# Supplementary material for: Immune profiling reveals prognostic genes in high-grade serous ovarian cancer
Source: publisher site journal article supplement (doi:10.18632/aging.103199), 2020-06-16
Supplement: Supplementary file [file aging-v12i12-103199-supplementary-material-SD2.pdf]

## SUPPLEMENTARY FIGURE

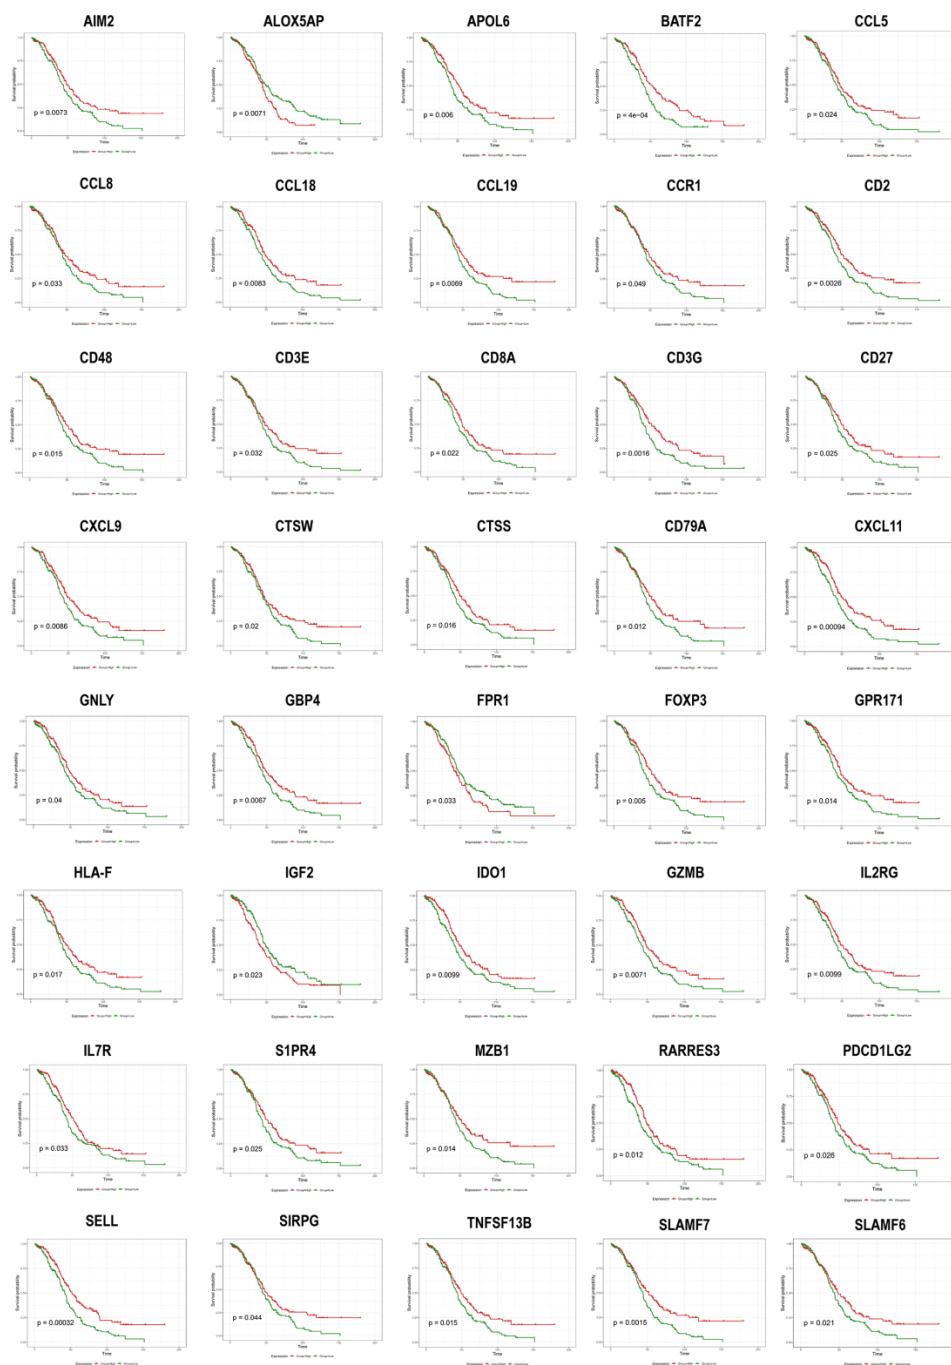

Supplementary Figure 1. The survival analysis of DEGs in HGSOC. OS=overall survival time in months.
