# Supplementary material for: Immune profiling reveals prognostic genes in high-grade serous ovarian cancer
Source: Aging (Albany NY). 2020 Jun 16;12(12):11398–415. doi: 10.18632/aging.103199 (PMC7343445; doi:10.18632/aging.103199)
Supplement: Supplementary Table 1 [file aging-12-103199-s004..xlsx]

## Sheet: SupplementaryTable1_TCGA_OS
Supplementary Table 1. The TMEscore values of TCGA samples calculated by CIBERSORT algorithm.
Samples	Time	Event	TMEscore	Group	Stage	Age
TCGA-04-1331	43.89	1	-0.70637	Low	III	78
TCGA-04-1332	40.97	1	-0.680369	Low	III	70
TCGA-04-1338	46.58	0	1.01135	High	III	78
TCGA-04-1341	1.08	0	-0.9644	Low	Not Available	85
TCGA-04-1343	11.86	1	-0.0142115	Low	IV	72
TCGA-04-1347	63.04	0	-1.80921	Low	IV	81
TCGA-04-1350	63.93	1	-1.42025	Low	III	46
TCGA-04-1356	49.24	1	-0.131649	Low	II	62
TCGA-04-1361	32.49	0	0.364974	High	III	57
TCGA-04-1362	44.28	1	-0.424585	Low	II	59
TCGA-04-1364	33.64	1	-2.4877	Low	III	61
TCGA-04-1365	76.51	0	1.19481	High	III	87
TCGA-04-1514	56.5	1	-2.25243	Low	III	45
TCGA-04-1530	118.99	1	0.606322	High	III	68
TCGA-04-1536	29.07	1	-0.414844	Low	IV	60
TCGA-04-1542	84.13	1	-2.32987	Low	III	52
TCGA-04-1648	28.61	1	0.420694	High	III	57
TCGA-04-1651	36.2	1	-0.302149	Low	III	53
TCGA-04-1655	45.34	1	-2.37651	Low	III	49
TCGA-09-0364	29.14	1	-2.93883	Low	II	80
TCGA-09-0366	57.72	1	0.662502	High	III	55
TCGA-09-0367	17.97	1	-0.0363983	Low	III	67
TCGA-09-0369	35.55	1	-1.19452	Low	III	56
TCGA-09-1659	9.99	1	-0.067952	Low	III	51
TCGA-09-1661	38.4	1	-0.822636	Low	III	75
TCGA-09-1662	89.26	1	0.609481	High	IV	58
TCGA-09-1665	41.59	1	0.538695	High	III	73
TCGA-09-1666	57.56	0	0.893566	High	III	57
TCGA-09-1667	61.83	0	1.0837	High	II	61
TCGA-09-1668	55.32	0	0.899589	High	III	57
TCGA-09-1669	30.49	0	0.672073	High	III	54
TCGA-09-1670	17.97	0	0.191864	High	III	57
TCGA-09-1673	3.02	0	-0.374135	Low	IV	50
TCGA-09-2044	6.11	0	0.662007	High	II	77
TCGA-09-2045	35.12	1	-0.177912	Low	IV	50
TCGA-09-2048	4.53	1	-1.06593	Low	III	63
TCGA-09-2051	63.04	0	0.655762	High	III	42
TCGA-09-2053	39.72	0	0.813122	High	III	72
TCGA-09-2054	20.93	1	-0.500204	Low	III	58
TCGA-09-2056	12.45	0	0.248156	High	III	62
TCGA-10-0927	81.8	1	-1.62376	Low	III	65
TCGA-10-0928	18.5	1	-1.58316	Low	III	71
TCGA-10-0931	32.85	1	-0.260031	Low	III	44
TCGA-10-0933	14.65	1	-1.06283	Low	III	77
TCGA-10-0936	36.89	1	0.181375	High	III	69
TCGA-10-0937	19.97	1	0.450242	High	III	44
TCGA-10-0938	20.89	1	-2.1391	Low	III	80
TCGA-13-0714	6.21	1	0.120413	High	IV	55
TCGA-13-0720	44.51	1	-0.958182	Low	III	48
TCGA-13-0724	2.73	1	-0.319771	Low	IV	72
TCGA-13-0725	12.39	1	0.419342	High	III	44
TCGA-13-0726	31.18	1	-0.362462	Low	III	55
TCGA-13-0727	15.18	1	-0.849071	Low	III	71
TCGA-13-0730	17.81	1	-0.300531	Low	III	71
TCGA-13-0762	111.7	0	-1.04556	Low	III	65
TCGA-13-0766	56.67	1	-0.0242691	Low	III	42
TCGA-13-0768	58.61	1	1.86123	High	III	73
TCGA-13-0795	20.34	1	1.20943	High	III	66
TCGA-13-0797	69.68	0	0.119481	High	III	49
TCGA-13-0800	87.42	0	-2.17726	Low	III	52
TCGA-13-0804	35.25	1	0.66822	High	III	73
TCGA-13-0883	68.89	1	0.167179	High	III	61
TCGA-13-0884	107.1	1	0.716322	High	III	39
TCGA-13-0885	111.3	0	1.65301	High	III	70
TCGA-13-0886	153.25	0	1.10254	High	III	67
TCGA-13-0887	66.62	1	-0.289602	Low	III	42
TCGA-13-0888	92.35	1	-2.54959	Low	III	78
TCGA-13-0891	102.76	1	-0.540333	Low	IV	73
TCGA-13-0893	43.33	1	0.616102	High	III	48
TCGA-13-0897	71.68	1	0.602365	High	III	54
TCGA-13-0900	133.94	0	0.390544	High	III	59
TCGA-13-0901	19.35	0	-0.307222	Low	III	41
TCGA-13-0905	123.06	0	-0.260335	Low	III	51
TCGA-13-0906	118.89	0	-0.149588	Low	III	50
TCGA-13-0908	60.55	1	0.130851	High	IV	58
TCGA-13-0911	44.51	1	0.519996	High	IV	55
TCGA-13-0916	58.64	0	0.633467	High	III	49
TCGA-13-0920	48.75	1	-0.201227	Low	III	65
TCGA-13-0923	83.67	0	0.348897	High	III	74
TCGA-13-0924	85.87	0	1.03973	High	IV	45
TCGA-13-1403	77.04	1	-1.24229	Low	III	48
TCGA-13-1404	81.11	0	0.153857	High	III	48
TCGA-13-1405	28.52	1	0.477027	High	IV	49
TCGA-13-1407	83.25	0	-1.66051	Low	III	51
TCGA-13-1408	55.19	1	-0.0945256	Low	III	59
TCGA-13-1409	57.23	1	-2.35149	Low	III	73
TCGA-13-1410	80.95	0	0.108611	High	IV	57
TCGA-13-1411	17.44	1	1.44977	High	III	81
TCGA-13-1477	54.6	1	-1.30407	Low	IV	49
TCGA-13-1483	29.4	1	0.0708728	High	III	61
TCGA-13-1485	20.66	1	-1.08189	Low	IV	48
TCGA-13-1487	22.37	1	-0.990816	Low	IV	74
TCGA-13-1488	70.76	1	0.718079	High	IV	59
TCGA-13-1489	83.87	1	-1.49327	Low	III	70
TCGA-13-1492	125.46	1	-0.755309	Low	III	66
TCGA-13-1495	90.31	1	-0.232103	Low	III	60
TCGA-13-1496	4.24	1	1.54096	High	III	65
TCGA-13-1497	127.17	0	0.162561	High	III	47
TCGA-13-1498	66.1	1	0.900091	High	III	73
TCGA-13-1499	114.98	0	1.46916	High	III	56
TCGA-13-1501	43.17	1	-0.644312	Low	IV	50
TCGA-13-1505	65.64	0	0.116869	High	III	63
TCGA-13-1506	34.13	1	-0.53842	Low	III	45
TCGA-13-1507	65.47	1	1.49924	High	III	77
TCGA-13-1509	80.09	0	0.253036	High	IV	64
TCGA-13-1510	44.65	1	0.193543	High	III	62
TCGA-13-1511	54.2	1	-0.64823	Low	IV	52
TCGA-13-1512	14.52	0	0.50401	High	III	49
TCGA-13-2060	77.83	0	1.45477	High	IV	51
TCGA-13-A5FT	70.4	0	-0.671174	Low	III	67
TCGA-20-0987	23.03	1	1.36491	High	III	61
TCGA-20-0991	26.18	0	2.24771	High	II	78
TCGA-20-1682	27.5	0	0.65271	High	III	56
TCGA-20-1683	25.36	0	-0.203793	Low	III	65
TCGA-20-1686	2.92	0	-0.593793	Low	III	75
TCGA-20-1687	2.66	0	0.207159	High	IV	46
TCGA-23-1021	47.5	1	-0.685265	Low	IV	45
TCGA-23-1022	49.64	1	-1.99138	Low	III	67
TCGA-23-1023	40.51	0	0.563931	High	III	65
TCGA-23-1024	15.37	0	-0.603682	Low	IV	52
TCGA-23-1026	26.81	0	0.659733	High	III	45
TCGA-23-1027	32.06	1	-0.115189	Low	III	48
TCGA-23-1028	49.38	0	0.25248	High	III	43
TCGA-23-1029	8.8	0	-0.510134	Low	III	46
TCGA-23-1030	29.11	0	-0.390308	Low	III	64
TCGA-23-1109	51.31	1	-0.0158412	Low	III	62
TCGA-23-1110	54.47	0	-2.34878	Low	III	42
TCGA-23-1111	3.22	0	-1.78442	Low	III	63
TCGA-23-1113	31.18	1	-1.74899	Low	IV	48
TCGA-23-1114	68.63	1	-1.76173	Low	III	55
TCGA-23-1116	19.45	1	0.735705	High	III	83
TCGA-23-1118	85.94	0	0.773502	High	III	45
TCGA-23-1119	129.86	0	0.837695	High	III	64
TCGA-23-1120	4.27	0	1.24828	High	III	60
TCGA-23-1122	39.06	1	-0.348708	Low	III	53
TCGA-23-1123	33.44	1	1.43055	High	III	59
TCGA-23-2077	115.8	0	0.528224	High	III	45
TCGA-23-2078	87.42	0	0.774563	High	III	66
TCGA-23-2084	49.8	1	0.0727427	High	IV	45
TCGA-24-0966	7.62	0	-0.110601	Low	III	78
TCGA-24-0970	11.63	1	-1.22358	Low	III	63
TCGA-24-0979	41.52	1	-0.473224	Low	IV	53
TCGA-24-0982	22.31	1	-0.333676	Low	III	77
TCGA-24-1103	54.07	1	-0.972254	Low	III	50
TCGA-24-1104	63.5	1	0.642461	High	IV	56
TCGA-24-1105	47.37	1	0.155968	High	III	36
TCGA-24-1413	6.31	0	-0.135012	Low	III	51
TCGA-24-1416	6.37	0	-0.326486	Low	IV	34
TCGA-24-1417	7.82	0	1.17496	High	IV	54
TCGA-24-1418	7.98	0	-0.175514	Low	III	68
TCGA-24-1419	7.85	0	-2.35768	Low	III	62
TCGA-24-1423	6.24	0	-0.0109686	High	III	61
TCGA-24-1424	6.01	0	-0.00885915	High	III	67
TCGA-24-1425	5.95	0	0.304281	High	III	45
TCGA-24-1426	5.35	0	-1.20014	Low	III	43
TCGA-24-1427	4.83	0	0.343919	High	III	58
TCGA-24-1428	17.38	0	0.863572	High	III	50
TCGA-24-1430	28.35	1	-1.48764	Low	III	68
TCGA-24-1431	18.63	1	-0.312458	Low	III	67
TCGA-24-1434	18.66	1	0.531865	High	III	59
TCGA-24-1435	43.5	1	0.510464	High	III	57
TCGA-24-1464	12.45	1	0.848645	High	III	70
TCGA-24-1467	105.91	1	-0.0809685	Low	III	51
TCGA-24-1469	9.1	0	0.133024	High	III	71
TCGA-24-1470	3.45	0	1.33936	High	III	54
TCGA-24-1471	1.18	0	-0.0335803	Low	III	60
TCGA-24-1474	22.21	1	0.0675388	High	III	57
TCGA-24-1544	26.94	1	-1.11786	Low	III	71
TCGA-24-1546	64.22	1	-0.213998	Low	III	46
TCGA-24-1549	56.54	1	0.780197	High	III	58
TCGA-24-1550	41.03	1	0.699631	High	III	49
TCGA-24-1551	51.87	1	0.761991	High	III	53
TCGA-24-1552	41.36	1	-1.11087	Low	III	77
TCGA-24-1553	58.05	1	1.76039	High	III	53
TCGA-24-1557	39.85	1	-0.388517	Low	III	49
TCGA-24-1558	19.51	1	-0.923969	Low	III	73
TCGA-24-1560	44.05	1	-0.715466	Low	III	51
TCGA-24-1562	45.47	1	0.0953218	High	III	67
TCGA-24-1563	47.67	1	0.271379	High	III	66
TCGA-24-1565	10.25	1	0.682585	High	III	74
TCGA-24-1567	17.21	1	-2.07226	Low	III	54
TCGA-24-1603	90.08	1	-0.24022	Low	III	53
TCGA-24-1604	88.3	1	0.022538	High	III	66
TCGA-24-1616	38.21	1	-1.19801	Low	III	56
TCGA-24-1842	8.31	0	1.01525	High	III	49
TCGA-24-1843	3.48	0	0.835839	High	III	66
TCGA-24-1844	3.71	0	-1.36489	Low	III	64
TCGA-24-1845	3.81	0	-0.0594925	Low	III	42
TCGA-24-1846	4.37	0	0.356018	High	III	45
TCGA-24-1847	11.27	0	1.59188	High	IV	45
TCGA-24-1850	5.52	0	0.34917	High	III	72
TCGA-24-1923	22.67	1	-0.324204	Low	III	51
TCGA-24-1924	30.19	1	1.47125	High	III	65
TCGA-24-1928	11.04	1	0.15594	High	III	77
TCGA-24-1930	81.04	1	1.22648	High	III	53
TCGA-24-2020	151.91	1	-1.39153	Low	III	67
TCGA-24-2023	44.81	1	0.117642	High	III	54
TCGA-24-2024	58.11	1	-0.245956	Low	III	72
TCGA-24-2026	34.79	1	0.553295	High	III	79
TCGA-24-2027	109.63	1	-1.20656	Low	IV	51
TCGA-24-2033	18.46	1	-0.491531	Low	III	87
TCGA-24-2035	28.15	1	0.879696	High	III	65
TCGA-24-2036	63.96	1	-1.49305	Low	III	50
TCGA-24-2038	44.48	1	-0.609553	Low	III	68
TCGA-24-2254	57.03	1	-0.492909	Low	III	66
TCGA-24-2267	47.5	1	1.43988	High	II	58
TCGA-24-2271	31.6	1	0.686869	High	III	55
TCGA-24-2280	70.4	0	-0.125186	Low	III	74
TCGA-24-2281	44.58	0	1.31363	High	II	68
TCGA-24-2289	67.31	1	0.201745	High	IV	68
TCGA-24-2290	36.2	1	0.139718	High	III	56
TCGA-24-2293	16.62	1	0.604905	High	Not Available	47
TCGA-24-2297	55.81	1	-0.535272	Low	III	56
TCGA-24-2298	53.22	1	-0.513595	Low	III	55
TCGA-25-1312	1.02	1	-0.416854	Low	IV	69
TCGA-25-1313	26.94	1	0.666986	High	IV	62
TCGA-25-1315	52	1	-1.95419	Low	III	50
TCGA-25-1316	42.02	1	0.565635	High	III	55
TCGA-25-1317	2	1	-0.692576	Low	III	66
TCGA-25-1318	34.95	1	-0.487745	Low	III	54
TCGA-25-1319	64.95	1	0.36229	High	III	73
TCGA-25-1320	37.94	1	-0.190621	Low	III	65
TCGA-25-1321	33.94	1	-0.79443	Low	III	65
TCGA-25-1322	2.99	1	-0.137909	Low	IV	62
TCGA-25-1323	12.98	1	-1.15968	Low	III	72
TCGA-25-1326	41.03	1	0.577641	High	III	61
TCGA-25-1328	66	1	-0.135032	Low	III	38
TCGA-25-1329	15.01	1	-0.326814	Low	III	76
TCGA-25-1623	18.56	1	1.25108	High	IV	71
TCGA-25-1626	17.02	1	1.02312	High	III	65
TCGA-25-1627	12.94	1	-0.632971	Low	III	73
TCGA-25-1628	20.6	1	0.982407	High	III	67
TCGA-25-1630	38.17	1	0.653252	High	III	73
TCGA-25-1632	59.1	1	-2.17407	Low	IV	68
TCGA-25-1633	62.12	1	0.642617	High	III	64
TCGA-25-1634	35.84	1	-2.4906	Low	III	75
TCGA-25-1635	52	1	0.481963	High	III	71
TCGA-25-1870	14.95	1	-0.199529	Low	III	59
TCGA-25-1877	23.98	1	0.976794	High	III	81
TCGA-25-2042	13.01	1	-0.016797	Low	III	60
TCGA-25-2391	49.01	1	0.0816682	High	III	57
TCGA-25-2392	1.02	1	0.858689	High	IV	75
TCGA-25-2393	38.01	1	-0.542744	Low	III	81
TCGA-25-2396	3.02	1	0.754817	High	III	71
TCGA-25-2398	44.97	1	-0.244443	Low	III	71
TCGA-25-2399	19.97	1	0.602754	High	III	80
TCGA-25-2400	41.98	1	-0.670015	Low	III	76
TCGA-25-2401	2.96	1	1.00502	High	III	64
TCGA-25-2404	29.01	1	0.100338	High	III	38
TCGA-25-2409	26.97	1	0.525317	High	IV	71
TCGA-29-1688	78.84	1	1.00953	High	III	39
TCGA-29-1690	47.57	1	0.817553	High	III	66
TCGA-29-1691	48.29	1	0.112581	High	III	51
TCGA-29-1693	101.71	0	0.278764	High	III	72
TCGA-29-1694	38.99	1	-0.222958	Low	III	45
TCGA-29-1695	40.37	1	0.782108	High	III	62
TCGA-29-1696	33.9	1	0.117024	High	III	43
TCGA-29-1697	31.18	1	-1.01822	Low	III	62
TCGA-29-1701	16.92	1	0.834782	High	III	56
TCGA-29-1703	59.63	1	-0.429952	Low	III	56
TCGA-29-1705	18.23	1	-0.16835	Low	III	47
TCGA-29-1710	31.24	1	1.40751	High	III	54
TCGA-29-1711	34.59	0	1.13895	High	III	45
TCGA-29-1761	17.35	1	0.647975	High	III	80
TCGA-29-1762	86.53	1	-1.37358	Low	IV	59
TCGA-29-1763	66.75	0	0.158333	High	II	43
TCGA-29-1766	39.39	1	0.560318	High	III	74
TCGA-29-1768	31.27	1	1.1782	High	IV	50
TCGA-29-1769	22.96	0	0.488989	High	III	40
TCGA-29-1770	24.34	0	-0.595619	Low	III	54
TCGA-29-1774	17.31	0	-1.91951	Low	III	82
TCGA-29-1776	11.83	0	-0.107372	Low	III	63
TCGA-29-1777	12.29	0	0.451334	High	III	47
TCGA-29-1778	14.91	0	0.65797	High	III	77
TCGA-29-1781	8.38	0	2.03448	High	III	69
TCGA-29-1783	7.23	0	0.382181	High	III	58
TCGA-29-1784	5.35	0	1.46563	High	III	55
TCGA-29-1785	36.27	1	1.56064	High	III	55
TCGA-29-2414	86.1	1	-1.48269	Low	III	75
TCGA-29-2425	64.95	0	-0.359966	Low	III	60
TCGA-29-2427	62.42	0	1.85286	High	III	60
TCGA-29-2428	45.07	0	1.2881	High	III	58
TCGA-29-A5NZ	35.74	1	-0.860057	Low	III	66
TCGA-30-1714	38.04	1	-0.748169	Low	IV	68
TCGA-30-1718	51.87	1	0.618435	High	III	44
TCGA-30-1853	36.24	1	-2.59083	Low	III	58
TCGA-30-1860	44.88	1	1.77001	High	III	58
TCGA-30-1861	34.76	1	-1.21697	Low	III	74
TCGA-30-1862	6.11	1	0.0389022	High	IV	65
TCGA-30-1866	36.6	1	0.838877	High	IV	61
TCGA-30-1891	30.03	1	0.214423	High	III	61
TCGA-30-1892	48.75	1	-0.0257449	Low	III	52
TCGA-31-1944	45.53	0	0.0858752	High	III	47
TCGA-31-1946	30.16	0	0.675717	High	III	30
TCGA-31-1950	18.76	0	0.682203	High	III	76
TCGA-31-1951	22.47	0	0.667377	High	III	58
TCGA-31-1953	6.7	0	1.49111	High	III	52
TCGA-31-1956	44.09	0	2.27524	High	III	60
TCGA-31-1959	2.2	0	0.862403	High	IV	49
TCGA-36-1568	28.75	0	0.345391	High	III	52
TCGA-36-1569	29.07	0	0.851853	High	III	52
TCGA-36-1570	21.52	0	-0.0296138	Low	III	49
TCGA-36-1571	22.83	1	-1.40934	Low	III	53
TCGA-36-1574	22.54	0	0.475296	High	III	48
TCGA-36-1576	30.06	0	1.05336	High	III	76
TCGA-36-1577	25.72	0	-1.6296	Low	II	43
TCGA-36-1580	24.21	1	0.423264	High	III	82
TCGA-36-1581	24.67	0	1.61291	High	II	63
TCGA-57-1582	24.01	1	-0.187683	Low	III	50
TCGA-57-1583	11.37	1	-1.14779	Low	III	57
TCGA-57-1584	21.12	0	-0.163466	Low	III	47
TCGA-57-1585	1.74	1	0.271888	High	III	57
TCGA-57-1586	22.31	0	0.117276	High	III	66
TCGA-57-1993	25.07	0	-0.669904	Low	III	56
TCGA-57-1994	25	0	1.3426	High	Not Available	63
TCGA-59-2348	180.06	0	0.0077539	High	III	59
TCGA-59-2350	22.31	1	-0.326953	Low	IV	44
TCGA-59-2351	116.03	0	1.03163	High	III	51
TCGA-59-2352	9.4	1	0.421084	High	III	78
TCGA-59-2354	34.36	1	0.811577	High	III	63
TCGA-59-2355	2.14	1	0.222856	High	IV	58
TCGA-59-2363	5.42	0	-1.20623	Low	III	40
TCGA-59-A5PD	20.5	1	-0.0343131	Low	I	55
TCGA-5X-AA5U	11.86	0	-1.81397	Low	II	61
TCGA-61-1721	11.1	0	0.515456	High	IV	38
TCGA-61-1724	20.93	1	-0.0963226	Low	III	47
TCGA-61-1725	31.41	0	0.471275	High	III	40
TCGA-61-1728	27.86	0	-0.427199	Low	IV	59
TCGA-61-1733	31.77	0	-0.46302	Low	III	71
TCGA-61-1736	48.75	1	-0.0740336	Low	III	45
TCGA-61-1737	44.81	0	0.340654	High	IV	42
TCGA-61-1738	35.78	1	0.129619	High	III	60
TCGA-61-1741	33.64	1	0.424234	High	III	76
TCGA-61-1900	5.78	0	-0.870353	Low	III	51
TCGA-61-1907	31.27	0	1.74546	High	III	63
TCGA-61-1910	37.02	0	-0.657274	Low	II	56
TCGA-61-1911	42.48	0	1.7057	High	II	55
TCGA-61-1914	56.57	0	0.651388	High	III	65
TCGA-61-1918	15.74	1	0.305243	High	IV	45
TCGA-61-1919	38.14	1	1.02522	High	III	58
TCGA-61-1995	2	0	0.837738	High	III	43
TCGA-61-1998	5.52	0	0.0449328	High	III	48
TCGA-61-2000	14.49	0	0.180803	High	III	67
TCGA-61-2002	17.97	0	1.21815	High	III	46
TCGA-61-2003	4.01	0	0.699025	High	III	53
TCGA-61-2008	30.62	0	0.010218	High	II	40
TCGA-61-2009	39.82	0	0.558797	High	III	65
TCGA-61-2012	30.62	0	1.14618	High	II	81
TCGA-61-2088	4.76	0	-1.49622	Low	III	51
TCGA-61-2092	51.68	0	-1.67558	Low	III	57
TCGA-61-2097	60.58	0	-0.294109	Low	II	71
TCGA-61-2098	65.47	0	-2.17114	Low	III	62
TCGA-61-2101	55.45	1	-0.766459	Low	III	55
TCGA-61-2102	6.47	1	-0.867259	Low	III	74
TCGA-61-2104	76.81	0	0.862315	High	II	53
TCGA-61-2109	20.66	1	-0.295256	Low	III	40
TCGA-61-2110	44.48	1	-0.790592	Low	III	56
TCGA-61-2111	125.66	0	0.349443	High	IV	61
TCGA-61-2113	22.21	1	0.616158	High	II	53
TCGA-OY-A56Q	18.92	0	-2.49096	Low	II	78
TCGA-WR-A838	9.99	1	-1.99018	Low	III	72
