# Supplementary material for: Immune profiling reveals prognostic genes in high-grade serous ovarian cancer
Source: Aging (Albany NY). 2020 Jun 16;12(12):11398–415. doi: 10.18632/aging.103199 (PMC7343445; doi:10.18632/aging.103199)
Supplement: Supplementary Table 2 [file aging-12-103199-s008..xlsx]

## Sheet: SupplementaryTable 2_TCGA_nrDEG
Supplementary Table 2. The list of DEGs between the TMEscore groups.
	logFC	AveExpr	t	P.Value	adj.P.Val	B
CD2	2.22997	2.96748	24.0665	3.83946e-77	6.44377e-73	165.029
CD48	1.7654	2.94504	22.3741	2.86106e-70	2.40086e-66	149.337
CD3D	1.94722	2.35436	21.8313	4.78682e-68	2.6779e-64	144.258
CD3E	1.98222	2.66969	21.7914	6.98276e-68	2.92979e-64	143.883
CCL5	2.32145	4.95907	20.959	1.86033e-64	6.24439e-61	136.057
IL2RG	1.98998	3.84058	20.7359	1.54858e-63	4.33164e-60	133.954
GZMA	1.98138	2.93928	20.3202	8.08444e-62	1.93165e-58	130.029
NKG7	2.18261	3.97403	20.3066	9.20763e-62	1.93165e-58	129.9
CXCR3	1.63331	2.07278	20.0809	7.89788e-61	1.47278e-57	127.767
SIT1	1.53022	2.03291	19.6338	5.60792e-59	9.41177e-56	123.536
CXCR6	1.21664	1.2923	19.5919	8.36383e-59	1.27609e-55	123.14
CCR5	1.37743	1.78626	19.5351	1.43829e-58	2.01156e-55	122.602
PRF1	1.5276	2.03828	19.4761	2.52604e-58	3.26112e-55	122.043
FYB	1.51923	2.67664	19.3586	7.74658e-58	9.28649e-55	120.93
PTPRC	1.5572	2.58147	19.1866	4.00192e-57	4.47761e-54	119.3
IL2RB	1.84223	2.66587	19.1431	6.05644e-57	6.35283e-54	118.889
SLAMF6	1.30971	1.40184	19.1024	8.93397e-57	8.46824e-54	118.503
LCP2	1.42048	2.8428	19.1007	9.0823e-57	8.46824e-54	118.487
SIRPG	1.19074	1.20933	18.9499	3.83193e-56	3.38481e-53	117.058
GIMAP4	1.37528	4.09876	18.8153	1.38405e-55	1.16142e-52	115.783
TNFSF13B	1.54677	3.32992	18.7083	3.84452e-55	3.0725e-52	114.769
SAMSN1	1.34521	2.41862	18.6983	4.22844e-55	3.22572e-52	114.675
CD247	0.998548	1.16535	18.6463	6.94446e-55	5.06734e-52	114.182
SLAMF8	1.78063	3.07867	18.5933	1.15252e-54	8.05948e-52	113.679
CXCL9	2.86455	3.80735	18.5833	1.26774e-54	8.5106e-52	113.585
CD53	1.78178	4.80938	18.3962	7.55825e-54	4.87885e-51	111.812
GIMAP7	1.31214	2.91703	18.3494	1.18054e-53	7.33817e-51	111.37
CD86	1.46832	2.93589	18.3184	1.58768e-53	9.51646e-51	111.076
SH2D1A	0.955976	0.858569	18.2458	3.17119e-53	1.83525e-50	110.389
EVI2B	1.69767	3.82324	18.1934	5.22845e-53	2.92497e-50	109.893
PTPN22	1.01903	1.41597	18.0856	1.46149e-52	7.91231e-50	108.872
ARHGAP15	0.709778	0.966491	18.0348	2.3734e-52	1.24477e-49	108.391
PYHIN1	0.800864	0.715432	18.031	2.4608e-52	1.2515e-49	108.355
CD96	1.02608	1.35307	18.0164	2.82911e-52	1.3965e-49	108.216
SASH3	1.57884	3.24165	18.0093	3.02547e-52	1.45076e-49	108.15
GMFG	1.16434	3.586	17.8573	1.28823e-51	6.00566e-49	106.712
HAVCR2	1.46446	3.18802	17.8414	1.4993e-51	6.80077e-49	106.561
GZMH	1.54242	1.84996	17.8102	2.01759e-51	8.91085e-49	106.266
ICOS	0.953102	0.819199	17.8074	2.07342e-51	8.92263e-49	106.239
SNX20	1.10997	1.43292	17.8003	2.21792e-51	9.30585e-49	106.172
TFEC	1.00191	1.29782	17.7421	3.86116e-51	1.55592e-48	105.622
STX11	1.18052	2.13385	17.7412	3.89373e-51	1.55592e-48	105.614
ITGAL	1.43615	2.21205	17.7249	4.54838e-51	1.77524e-48	105.459
NCF1	1.17658	1.76906	17.7017	5.67093e-51	2.16307e-48	105.24
GZMM	1.08694	1.29707	17.6543	8.91194e-51	3.32376e-48	104.792
SLA2	0.985811	1.28207	17.6247	1.18121e-50	4.30961e-48	104.512
CD8A	1.56183	2.20588	17.6166	1.27597e-50	4.55628e-48	104.435
LST1	1.44898	3.41198	17.5098	3.52387e-50	1.23211e-47	103.427
FCER1G	1.57872	7.27881	17.4835	4.52979e-50	1.5515e-47	103.178
PDCD1LG2	1.29192	1.75508	17.4466	6.43437e-50	2.15976e-47	102.829
FGL2	1.63799	3.36766	17.438	6.98332e-50	2.29806e-47	102.748
LILRB4	1.54239	2.76729	17.4354	7.15385e-50	2.30891e-47	102.724
ABI3	1.32335	3.36996	17.4281	7.6732e-50	2.4298e-47	102.655
AIF1	1.56042	4.99582	17.4224	8.09954e-50	2.51731e-47	102.601
GZMK	1.38784	1.41694	17.3884	1.11923e-49	3.41529e-47	102.28
C1QA	1.79085	7.51936	17.3433	1.71745e-49	5.14713e-47	101.855
TNFAIP8L2	1.35148	2.97072	17.3027	2.52831e-49	7.44434e-47	101.471
P2RY10	1.03916	0.928715	17.2426	4.47409e-49	1.29463e-46	100.904
FASLG	0.911891	0.80285	17.2328	4.91284e-49	1.39749e-46	100.811
BIN2	1.21248	2.15246	17.2162	5.75406e-49	1.60951e-46	100.655
MS4A6A	1.61322	3.4439	17.2091	6.15227e-49	1.674e-46	100.588
IGSF6	1.14893	2.52675	17.2086	6.18412e-49	1.674e-46	100.583
SLAMF1	0.721551	0.650504	17.1588	9.91911e-49	2.60538e-46	100.114
TIGIT	0.798342	0.759417	17.1587	9.93531e-49	2.60538e-46	100.112
CTSS	1.61883	5.12726	17.0989	1.75346e-48	4.52742e-46	99.5484
GPR65	1.04822	1.58713	17.0821	2.05565e-48	5.22727e-46	99.3906
TYROBP	1.50787	7.77081	17.0395	3.07946e-48	7.71383e-46	98.9894
CD3G	1.0513	1.1521	17.0305	3.35592e-48	8.2827e-46	98.904
MNDA	1.49503	3.04022	17.0066	4.20962e-48	1.02391e-45	98.679
CTSW	1.63367	2.71557	16.9396	7.94859e-48	1.90573e-45	98.0481
RHOH	0.687868	0.756588	16.8622	1.65614e-47	3.91478e-45	97.3194
C1QB	1.91186	7.90615	16.8599	1.69286e-47	3.946e-45	97.2976
SLAMF7	1.70402	1.99158	16.8557	1.76234e-47	4.05168e-45	97.2577
HLA-DQA1	2.18308	4.82838	16.843	1.98628e-47	4.50484e-45	97.1389
FCGR1A	1.28091	2.4287	16.8097	2.7258e-47	6.09962e-45	96.8248
GBP5	1.64424	2.28173	16.7431	5.12106e-47	1.13088e-44	96.1988
LAIR1	1.39663	2.86709	16.6568	1.15948e-46	2.51056e-44	95.3876
SPI1	1.45443	5.25176	16.6562	1.1668e-46	2.51056e-44	95.3814
LTA	0.842104	0.993768	16.635	1.42627e-46	3.03001e-44	95.182
CD7	1.51757	2.51558	16.5954	2.07392e-46	4.35083e-44	94.8104
PLEK	1.59305	3.62217	16.5656	2.74867e-46	5.69517e-44	94.5308
S1PR4	1.04488	1.60588	16.5611	2.87033e-46	5.87473e-44	94.4878
EVI2A	1.38493	2.94778	16.5507	3.16572e-46	6.40123e-44	94.3906
GPR171	1.01261	1.04767	16.5436	3.38627e-46	6.76569e-44	94.3237
CLEC7A	1.37823	2.39318	16.5244	4.05988e-46	8.01612e-44	94.1437
LAPTM5	1.79071	6.92407	16.4912	5.55675e-46	1.08441e-43	93.8321
CD300LF	1.07302	1.49524	16.4677	6.94084e-46	1.33894e-43	93.6113
XCL2	1.46007	1.92525	16.4602	7.45416e-46	1.42163e-43	93.5405
SRGN	1.53102	6.97421	16.4533	7.95201e-46	1.49953e-43	93.4763
KLRB1	1.10372	1.47142	16.4415	8.89296e-46	1.65834e-43	93.3653
ANKRD22	1.35419	2.01017	16.4297	9.94222e-46	1.82299e-43	93.2546
CD37	1.28581	3.6009	16.4291	9.99317e-46	1.82299e-43	93.2495
TRAT1	0.775965	0.657582	16.3606	1.91009e-45	3.44699e-43	92.6065
TBX21	0.643018	0.60108	16.3351	2.42881e-45	4.33647e-43	92.368
CD5	1.07757	1.47383	16.2947	3.55817e-45	6.28597e-43	91.989
C1QC	1.81627	8.17764	16.1866	9.86929e-45	1.72538e-42	90.9764
LILRB2	1.2141	2.07804	16.1687	1.16815e-44	2.02114e-42	90.809
BTK	1.04772	1.71653	16.129	1.69758e-44	2.9072e-42	90.438
FCGR3A	1.81087	5.01709	16.1062	2.1055e-44	3.56936e-42	90.2243
ITK	0.660527	0.601225	16.0307	4.28666e-44	7.1943e-42	89.5186
HLA-DPB1	1.72426	7.23781	16.0222	4.64525e-44	7.71893e-42	89.4388
NCF4	1.23824	3.07371	16.0017	5.63193e-44	9.21701e-42	89.2477
LILRB1	1.1613	1.95258	16.0013	5.65663e-44	9.21701e-42	89.2433
TESPA1	0.568019	0.584471	15.9867	6.4852e-44	1.04655e-41	89.1076
LYZ	2.35267	5.84252	15.9394	1.0124e-43	1.61821e-41	88.6656
TAGAP	1.14354	1.94512	15.905	1.39895e-43	2.21495e-41	88.3446
CD52	1.69543	4.98366	15.9009	1.4547e-43	2.28171e-41	88.3058
GZMB	1.76402	2.44832	15.8754	1.84838e-43	2.87236e-41	88.0681
FERMT3	1.32469	3.91288	15.8533	2.27429e-43	3.50179e-41	87.8622
HLA-DPA1	2.00645	6.69458	15.8406	2.56317e-43	3.91069e-41	87.7436
FOXP3	1.10553	2.07951	15.7487	6.07793e-43	9.18973e-41	86.8866
LY96	1.34901	4.1149	15.7421	6.4657e-43	9.68874e-41	86.8252
ARHGAP9	1.08023	1.97871	15.7254	7.56309e-43	1.12329e-40	86.6696
CYTIP	1.13232	2.05319	15.7191	8.02348e-43	1.18121e-40	86.6109
ZNF683	1.4307	1.55691	15.6874	1.07982e-42	1.57589e-40	86.3162
CTLA4	0.949555	0.938759	15.6776	1.18374e-42	1.71265e-40	86.225
CCRL2	0.801561	1.45825	15.6607	1.38685e-42	1.98936e-40	86.0678
TRAF3IP3	0.652478	0.808546	15.6538	1.47999e-42	2.10497e-40	86.0033
APBB1IP	1.3969	2.89722	15.6493	1.54447e-42	2.17822e-40	85.9609
IL10RA	1.37724	2.65385	15.6427	1.64278e-42	2.29757e-40	85.8997
IL12RB1	0.917154	1.32427	15.6194	2.04276e-42	2.83336e-40	85.6834
IL21R	0.982121	0.973893	15.6144	2.14248e-42	2.94732e-40	85.6361
CYBB	1.80729	4.4719	15.5607	3.5435e-42	4.83501e-40	85.1367
SP140	0.767348	1.01273	15.5223	5.07473e-42	6.86848e-40	84.7803
AIM2	1.16459	1.27868	15.4662	8.57798e-42	1.15171e-39	84.2593
CXCL13	2.25494	2.55093	15.4557	9.46866e-42	1.26121e-39	84.1613
LY86	1.32206	3.70378	15.4089	1.46588e-41	1.93716e-39	83.7275
WAS	1.22765	3.58043	15.3652	2.20664e-41	2.89329e-39	83.3216
CXCL10	2.47024	6.37752	15.3114	3.64445e-41	4.74146e-39	82.8236
HLA-E	1.05612	8.53026	15.308	3.7616e-41	4.85622e-39	82.7922
RASAL3	1.0503	1.90941	15.2789	4.93813e-41	6.32646e-39	82.5221
C1orf162	1.14124	4.10397	15.2318	7.66112e-41	9.74065e-39	82.0863
MS4A4A	1.39402	3.08491	15.2306	7.74979e-41	9.7793e-39	82.0749
SELPLG	1.44441	3.94855	15.1986	1.04443e-40	1.30811e-38	81.7787
B2M	1.26845	10.0858	15.196	1.06964e-40	1.32976e-38	81.7551
RAC2	1.39309	4.54243	15.1262	2.05035e-40	2.53023e-38	81.1093
CD68	0.900701	2.00831	15.113	2.31892e-40	2.84077e-38	80.9872
HCK	1.40662	3.31197	15.1114	2.35405e-40	2.8629e-38	80.9722
THEMIS	0.602928	0.516518	15.1079	2.43071e-40	2.93486e-38	80.9404
GIMAP6	1.13335	2.75376	15.0833	3.05719e-40	3.66491e-38	80.7129
CD27	1.26212	2.38778	15.0397	4.58551e-40	5.45806e-38	80.3105
RNASE6	1.51008	4.66943	15.0317	4.93872e-40	5.83708e-38	80.2369
CCL4	1.51675	3.44775	15.0004	6.6102e-40	7.75067e-38	79.9476
CLEC4A	1.13326	2.14096	14.9997	6.65016e-40	7.75067e-38	79.9416
NCKAP1L	1.22731	2.23785	14.996	6.88104e-40	7.96445e-38	79.9078
ADAMDEC1	1.91301	2.11231	14.995	6.94695e-40	7.98566e-38	79.8983
DOK2	1.19176	2.65359	14.9892	7.33545e-40	8.37489e-38	79.8443
HLA-F	1.42614	4.15292	14.9506	1.04975e-39	1.1904e-37	79.4886
FPR3	1.70695	3.8178	14.9467	1.08806e-39	1.22557e-37	79.4531
C3AR1	1.55964	3.90164	14.9228	1.35875e-39	1.52026e-37	79.2326
HLA-DRA	1.8281	10.2268	14.881	2.00198e-39	2.22512e-37	78.848
CD84	1.1929	1.983	14.8576	2.48959e-39	2.74887e-37	78.6317
FCGR1B	0.590044	0.798002	14.8541	2.57005e-39	2.81916e-37	78.6001
CD244	0.521542	0.499097	14.8412	2.898e-39	3.15825e-37	78.4809
CXorf21	0.954615	1.55738	14.7977	4.33618e-39	4.6951e-37	78.0811
ARHGDIB	1.15291	6.40143	14.7945	4.46689e-39	4.80563e-37	78.0516
SELL	1.38748	2.59058	14.7571	6.31697e-39	6.75272e-37	77.7077
CXCL11	2.15167	3.64784	14.7399	7.40582e-39	7.86657e-37	77.5499
RGS18	0.790183	1.07909	14.7305	8.07584e-39	8.52433e-37	77.464
SIGLEC10	1.30787	2.08751	14.7011	1.06028e-38	1.11217e-36	77.1938
CCR1	1.3537	3.35206	14.6821	1.26411e-38	1.31774e-36	77.0194
SLA	1.06372	1.97328	14.6136	2.38231e-38	2.46805e-36	76.3906
AOAH	1.34987	2.28651	14.5431	4.56752e-38	4.70286e-36	75.7447
GBP4	1.71073	4.02136	14.5099	6.20249e-38	6.34734e-36	75.4411
FCGR2A	1.38513	3.97044	14.468	9.1285e-38	9.23917e-36	75.0577
HLA-B	1.46306	9.54191	14.4678	9.13843e-38	9.23917e-36	75.0566
SCIMP	0.873351	1.54052	14.449	1.08732e-37	1.09272e-35	74.8841
IL2RA	1.00538	1.44303	14.4422	1.15775e-37	1.15657e-35	74.8219
TYMP	1.49932	5.45968	14.4277	1.32225e-37	1.31309e-35	74.69
LRRC25	1.20904	3.15677	14.4144	1.49435e-37	1.47527e-35	74.5686
CST7	1.66806	3.71755	14.4048	1.63344e-37	1.60316e-35	74.4803
PTPN7	0.979728	1.77556	14.3823	2.00966e-37	1.96094e-35	74.2747
HCST	1.11921	4.75445	14.3239	3.4371e-37	3.33439e-35	73.7422
TMEM150B	0.915712	1.50904	14.2694	5.6674e-37	5.46644e-35	73.246
TLR2	1.16845	2.87809	14.2371	7.624e-37	7.31163e-35	72.9518
CD40LG	0.680573	0.668032	14.181	1.27614e-36	1.2169e-34	72.4408
LPXN	0.865422	3.61657	14.1683	1.43295e-36	1.35871e-34	72.3258
MSR1	1.27968	3.28893	14.1459	1.76002e-36	1.65946e-34	72.1218
CYTH4	1.15273	2.40333	14.1385	1.88301e-36	1.76551e-34	72.0548
CLEC4E	1.19034	1.50059	14.1363	1.92093e-36	1.79106e-34	72.035
FCGR2B	1.18034	2.07663	14.1304	2.02756e-36	1.88003e-34	71.9814
LAT2	1.03277	2.58742	14.1235	2.16091e-36	1.99267e-34	71.9182
BATF	1.32068	2.49583	14.1184	2.26383e-36	2.07616e-34	71.8721
HLA-DRB1	1.76838	9.12873	14.107	2.51264e-36	2.29183e-34	71.7686
GIMAP2	1.06484	2.7711	14.0689	3.56019e-36	3.22976e-34	71.4229
LY9	0.428445	0.396427	14.0516	4.16985e-36	3.76251e-34	71.2661
UBASH3A	0.650137	0.772712	14.0181	5.6649e-36	5.08417e-34	70.9621
PSMB9	1.52862	5.29955	13.9794	8.06715e-36	7.20165e-34	70.6114
CSF2RB	1.17288	1.87834	13.9761	8.31161e-36	7.38062e-34	70.5818
MPEG1	1.48534	3.4418	13.9724	8.59457e-36	7.59172e-34	70.5486
CD4	1.24441	4.94205	13.9645	9.23767e-36	8.11706e-34	70.477
GIMAP1	0.710197	1.34854	13.9551	1.00703e-35	8.8026e-34	70.3914
ZAP70	0.810428	1.10158	13.9505	1.0498e-35	9.12889e-34	70.3502
APOC1	1.41479	5.92379	13.9142	1.46159e-35	1.26443e-33	70.0219
LCK	1.07762	2.05527	13.8986	1.6852e-35	1.4504e-33	69.8807
TLR8	0.911395	1.07015	13.8919	1.79131e-35	1.53386e-33	69.8201
IL18RAP	0.437373	0.446265	13.8733	2.12188e-35	1.80769e-33	69.6521
CD180	0.937225	1.65007	13.8285	3.18978e-35	2.70374e-33	69.2477
IGJ	3.03512	4.68645	13.8251	3.29138e-35	2.77584e-33	69.2166
C16orf54	0.894086	1.20374	13.8007	4.10926e-35	3.44828e-33	68.9965
IKZF1	0.984157	1.6761	13.7979	4.21377e-35	3.51839e-33	68.9715
APOL3	1.32073	2.91068	13.7896	4.54399e-35	3.77534e-33	68.8967
CD38	1.13515	1.5381	13.7849	4.74393e-35	3.92204e-33	68.854
MS4A7	1.20788	3.09533	13.7787	5.0184e-35	4.12862e-33	68.7982
CASP1	1.16136	3.33297	13.7703	5.41726e-35	4.43502e-33	68.7223
ITGB2	1.55206	4.49887	13.7202	8.53493e-35	6.95348e-33	68.2714
GLRX	0.838726	2.5272	13.6831	1.19559e-34	9.69348e-33	67.9371
DOCK2	0.93328	1.49021	13.6177	2.16244e-34	1.74482e-32	67.3493
CCR2	0.93898	0.952159	13.6124	2.26866e-34	1.82177e-32	67.3018
CD14	1.44744	6.62748	13.6057	2.41124e-34	1.92704e-32	67.2413
GPR84	1.17924	1.96276	13.5922	2.7235e-34	2.16628e-32	67.1205
RCSD1	0.886121	1.76957	13.5584	3.69741e-34	2.92706e-32	66.8173
HLA-A	1.10906	9.17087	13.4941	6.6124e-34	5.21014e-32	66.2408
GRAP2	0.476201	0.495247	13.4853	7.15596e-34	5.61208e-32	66.1624
CCL8	1.58341	3.00824	13.4819	7.38245e-34	5.76277e-32	66.1315
TMEM156	0.564103	0.661378	13.4778	7.65805e-34	5.95024e-32	66.0952
ICAM3	0.644063	0.718376	13.4645	8.63627e-34	6.67938e-32	65.9759
NPL	0.926385	2.58859	13.4488	9.94756e-34	7.65825e-32	65.8357
SAMD3	0.288885	0.295772	13.3744	1.94644e-33	1.49165e-31	65.17
NCF2	1.13281	2.89497	13.3633	2.1509e-33	1.64084e-31	65.071
2019-03-01	0.74476	1.81006	13.3422	2.59896e-33	1.96961e-31	64.8833
TAP1	1.41505	5.68455	13.342	2.60534e-33	1.96961e-31	64.8809
LSP1	1.18956	4.22009	13.3342	2.7937e-33	2.10254e-31	64.8116
EOMES	0.705629	0.7736	13.332	2.85074e-33	2.13589e-31	64.7916
GIMAP5	0.446757	0.514393	13.3036	3.67882e-33	2.74408e-31	64.5387
NCR3	0.711217	0.780999	13.2417	6.41416e-33	4.76322e-31	63.9874
SIGLEC9	1.01019	1.99409	13.2389	6.57702e-33	4.86265e-31	63.9625
FAM26F	1.48235	3.68583	13.2134	8.26951e-33	6.08716e-31	63.7355
CD80	0.585377	0.739727	13.118	1.94354e-32	1.42438e-30	62.8881
GPSM3	1.15922	4.94036	13.104	2.20211e-32	1.60687e-30	62.7643
NFAM1	1.00225	1.97206	13.0447	3.74147e-32	2.71832e-30	62.2387
AMICA1	0.744042	0.953179	13.0209	4.62792e-32	3.34786e-30	62.0278
TLR7	1.02329	1.66923	12.9803	6.6457e-32	4.7869e-30	61.669
BCL2A1	1.25241	2.83755	12.9541	8.39519e-32	6.02122e-30	61.4373
CD300C	0.980661	1.76886	12.9534	8.44657e-32	6.03229e-30	61.4313
CD33	0.737705	1.2434	12.9191	1.14553e-31	8.14634e-30	61.1292
MLKL	0.76437	1.85118	12.918	1.1577e-31	8.19817e-30	61.1187
CD300A	1.07581	2.83321	12.873	1.72675e-31	1.21765e-29	60.7223
APOBEC3H	0.828857	1.27099	12.8495	2.12714e-31	1.49372e-29	60.5156
IFNG	0.587612	0.469505	12.8277	2.58146e-31	1.80519e-29	60.3237
TMEM52B	0.633931	0.926923	12.8149	2.89144e-31	2.01357e-29	60.2112
CD163	1.4653	3.63941	12.7992	3.32524e-31	2.30609e-29	60.0726
PDCD1	1.00899	1.46442	12.7974	3.37718e-31	2.33248e-29	60.0573
IRF8	1.07794	2.24594	12.7835	3.82162e-31	2.62862e-29	59.9347
CSF2RA	0.855772	1.48667	12.7773	4.03737e-31	2.76568e-29	59.8803
C10orf128	0.770081	1.35894	12.7688	4.35261e-31	2.96951e-29	59.8057
ITGAX	1.06583	2.55116	12.7181	6.81937e-31	4.63358e-29	59.3606
VSIG4	1.56311	4.81369	12.7093	7.37181e-31	4.98875e-29	59.2834
SIRPB2	0.804216	1.10498	12.68	9.55323e-31	6.43903e-29	59.0264
GPR183	1.42089	3.56651	12.6653	1.08733e-30	7.29947e-29	58.8981
UBD	1.83631	2.44284	12.6378	1.386e-30	9.26745e-29	58.6575
LAG3	1.18757	2.68475	12.6299	1.4867e-30	9.90132e-29	58.588
VAMP5	0.904009	5.23008	12.6208	1.61017e-30	1.06812e-28	58.5089
EBI3	1.20848	2.4595	12.5991	1.95134e-30	1.28935e-28	58.3184
FGR	0.993061	2.33698	12.583	2.24714e-30	1.47897e-28	58.1785
HLA-DMA	1.41334	6.54182	12.5706	2.50759e-30	1.64394e-28	58.0698
WIPF1	0.937834	3.42411	12.5408	3.25996e-30	2.12887e-28	57.8097
GPR18	0.500777	0.748164	12.4965	4.81109e-30	3.12963e-28	57.4239
ADAP2	1.02012	3.14025	12.4912	5.04385e-30	3.26838e-28	57.3771
SIGLEC14	1.21418	1.99954	12.488	5.18543e-30	3.3472e-28	57.3497
TRIM22	1.24305	4.2672	12.4872	5.22355e-30	3.35888e-28	57.3424
CCR7	0.905873	1.38102	12.485	5.32339e-30	3.41001e-28	57.3237
OSCAR	1.09044	2.74251	12.477	5.71006e-30	3.6438e-28	57.2542
SIGLEC8	0.878659	0.980801	12.4678	6.19481e-30	3.93816e-28	57.1734
HLA-C	1.23816	9.45963	12.4576	6.76992e-30	4.28753e-28	57.0854
GNGT2	0.660405	1.42405	12.4498	7.25042e-30	4.57458e-28	57.0174
IL15RA	1.17268	3.15174	12.4437	7.65032e-30	4.80881e-28	56.9642
GAB3	0.651397	1.17899	12.3438	1.83591e-29	1.1497e-27	56.0966
OLR1	1.38242	3.01611	12.3319	2.03651e-29	1.27059e-27	55.9939
DPYD	1.07075	2.33737	12.3196	2.26811e-29	1.40984e-27	55.8871
STAT4	0.584128	0.867789	12.3144	2.37317e-29	1.4697e-27	55.8422
GNA15	1.03922	2.77022	12.314	2.38236e-29	1.46997e-27	55.8384
CD74	1.44825	11.0188	12.3047	2.58353e-29	1.58826e-27	55.7581
TRPV2	0.884456	2.63776	12.2794	3.22303e-29	1.97416e-27	55.5389
GFI1	0.571594	0.732244	12.2762	3.31264e-29	2.02168e-27	55.5117
CCR4	0.603533	0.652286	12.2003	6.42231e-29	3.90527e-27	54.8556
GBP2	1.26817	4.13116	12.1864	7.24672e-29	4.39068e-27	54.736
TLR4	1.04974	2.07429	12.1554	9.49091e-29	5.72971e-27	54.4686
SDS	1.13416	3.09714	12.1434	1.05367e-28	6.33827e-27	54.365
CD72	0.722766	1.94882	12.1318	1.1645e-28	6.97993e-27	54.2659
TMC8	0.898734	2.59094	12.1314	1.16885e-28	6.98105e-27	54.2622
SIGLEC7	0.913649	1.78129	12.1172	1.32295e-28	7.87341e-27	54.1395
APOL6	1.26122	3.99457	12.1073	1.44159e-28	8.54921e-27	54.0544
ALOX5AP	1.62377	4.85145	12.0987	1.55242e-28	9.17401e-27	53.981
HMOX1	1.17007	4.86561	12.0659	2.06367e-28	1.21525e-26	53.699
HLA-DMB	1.33149	4.89247	12.0572	2.22542e-28	1.30592e-26	53.6242
GPR34	1.24215	3.10328	11.999	3.68172e-28	2.15297e-26	53.1254
SPN	0.780241	1.34177	11.9729	4.61246e-28	2.68788e-26	52.9021
FLI1	0.724984	1.79498	11.9574	5.27622e-28	3.06404e-26	52.7689
CSF1R	1.46953	4.68313	11.9449	5.87449e-28	3.39971e-26	52.6625
PIK3CG	0.759937	1.16844	11.9285	6.77155e-28	3.90539e-26	52.5217
KIR2DL4	0.628112	0.598621	11.9273	6.83643e-28	3.92931e-26	52.5122
LILRB3	0.594033	1.18104	11.9257	6.9369e-28	3.97345e-26	52.4978
HK3	0.920096	1.77453	11.9216	7.18228e-28	4.10001e-26	52.4633
FAM78A	0.777564	1.96859	11.9212	7.20956e-28	4.10163e-26	52.4596
SLC9A9	0.835442	1.87489	11.9112	7.85707e-28	4.45491e-26	52.3744
PARP15	0.473335	0.666173	11.9004	8.62255e-28	4.87247e-26	52.2823
HLA-DQB1	1.74538	5.66484	11.8724	1.09763e-27	6.18173e-26	52.0431
CLIC2	0.837938	2.39311	11.8452	1.38639e-27	7.78185e-26	51.8118
APOBEC3G	0.99543	3.25053	11.8082	1.90646e-27	1.06654e-25	51.4962
LILRA5	0.699491	1.14683	11.7426	3.34571e-27	1.86548e-25	50.9391
PIK3AP1	0.965701	2.90221	11.7361	3.53603e-27	1.96507e-25	50.8843
TMIGD2	0.618137	0.632663	11.7061	4.57213e-27	2.53248e-25	50.6297
CORO1A	1.12487	4.35204	11.69	5.24644e-27	2.89642e-25	50.4935
P2RY8	0.512812	0.680312	11.6763	5.90206e-27	3.24768e-25	50.3768
P2RY13	1.04587	1.73452	11.6738	6.02683e-27	3.3055e-25	50.3561
CD69	1.08315	2.07767	11.6726	6.09153e-27	3.3301e-25	50.3455
ITGAM	1.10599	2.3119	11.6431	7.83796e-27	4.27093e-25	50.0958
HCLS1	1.09035	3.43522	11.599	1.14105e-26	6.19749e-25	49.7239
PLA2G2D	1.15702	0.993849	11.5955	1.17615e-26	6.36751e-25	49.6939
ETV7	1.24283	2.84241	11.5735	1.41827e-26	7.65364e-25	49.5085
TBXAS1	0.854556	2.12516	11.5545	1.66677e-26	8.96581e-25	49.3486
MYO1F	0.905229	2.42335	11.5354	1.96094e-26	1.05145e-24	49.1876
RNASE2	1.06972	2.28515	11.515	2.33247e-26	1.24668e-24	49.0158
DOCK8	0.85191	1.87678	11.5091	2.45235e-26	1.30659e-24	48.9661
SIGLEC1	1.28768	2.95454	11.4899	2.88638e-26	1.53298e-24	48.8048
CD226	0.254243	0.358829	11.4874	2.94779e-26	1.56066e-24	48.7839
IL7R	1.23338	1.76795	11.4853	3.00007e-26	1.58334e-24	48.7665
PSMB8	1.05308	6.82341	11.4732	3.32441e-26	1.74901e-24	48.6648
GPRIN3	0.567098	1.15021	11.4646	3.57525e-26	1.87511e-24	48.5928
GNLY	1.42521	2.16931	11.4464	4.17059e-26	2.18053e-24	48.4403
GLIPR1	0.878132	2.60432	11.4418	4.33635e-26	2.26015e-24	48.4017
ARHGAP30	0.884776	3.13722	11.429	4.8361e-26	2.51282e-24	48.2937
SLFN12L	0.345227	0.471938	11.3947	6.46096e-26	3.34674e-24	48.0068
PSMB10	0.934622	5.07194	11.3928	6.56812e-26	3.39178e-24	47.9905
IL18BP	0.773535	3.22294	11.3919	6.61705e-26	3.40656e-24	47.9832
TLR1	0.903763	2.18246	11.3862	6.94227e-26	3.56306e-24	47.9357
SLC7A7	1.00685	3.13043	11.3715	7.86414e-26	4.0239e-24	47.8122
DOK3	0.788182	2.51051	11.3701	7.95404e-26	4.05753e-24	47.801
CD274	0.735313	1.47186	11.3649	8.31332e-26	4.22795e-24	47.7572
GIMAP8	0.776088	1.7693	11.3399	1.02642e-25	5.20435e-24	47.5485
IFI30	0.63676	1.38483	11.3374	1.04801e-25	5.29784e-24	47.5279
SERPINA1	1.56391	5.07739	11.3053	1.37387e-25	6.92421e-24	47.2598
TNFRSF9	0.679026	0.958797	11.2988	1.45062e-25	7.28915e-24	47.206
VNN2	0.907076	1.45266	11.2881	1.5875e-25	7.95312e-24	47.1167
PIK3R5	0.771391	1.60584	11.287	1.60212e-25	8.0025e-24	47.1076
EPB41L3	0.845059	1.73845	11.2689	1.86588e-25	9.29232e-24	46.9567
HLA-DRB5	2.01013	6.80734	11.2495	2.19621e-25	1.0905e-23	46.7954
IRF4	0.878119	0.855596	11.2241	2.71889e-25	1.34605e-23	46.584
MYO1G	0.675733	1.62674	11.1741	4.13552e-25	2.04137e-23	46.1688
ARHGEF6	0.795979	2.1594	11.1455	5.25601e-25	2.58685e-23	45.9314
TREM2	1.29452	4.80675	11.1261	6.17838e-25	3.03192e-23	45.7714
ADORA3	0.996485	2.40757	11.1066	7.27243e-25	3.5584e-23	45.61
SLC37A2	0.921712	2.10959	11.0574	1.09662e-24	5.35016e-23	45.2034
FPR1	1.21579	2.55118	11.046	1.20547e-24	5.86416e-23	45.1098
SMPDL3A	0.833093	2.40985	11.0219	1.47332e-24	7.14645e-23	44.9112
KLHDC7B	1.18576	2.1075	11.0162	1.54532e-24	7.47412e-23	44.8639
HLA-DOA	1.59826	4.23448	10.9966	1.81814e-24	8.76833e-23	44.703
IKZF3	0.804954	1.3409	10.9815	2.06144e-24	9.91322e-23	44.5787
CARD16	0.834805	3.48765	10.9773	2.13522e-24	1.02387e-22	44.5439
SNX10	0.897558	3.69625	10.9579	2.50865e-24	1.19951e-22	44.3844
DOCK10	0.674674	1.4813	10.9563	2.54122e-24	1.21163e-22	44.3716
GBP1	1.17368	5.41023	10.92	3.43491e-24	1.63309e-22	44.0734
CLEC2B	1.04268	2.92123	10.908	3.79354e-24	1.7985e-22	43.9751
TNFRSF1B	1.09521	4.11582	10.9072	3.81802e-24	1.80501e-22	43.9687
PTAFR	1.08132	3.4279	10.897	4.15596e-24	1.95926e-22	43.8848
KYNU	0.469582	0.696538	10.8703	5.18297e-24	2.43658e-22	43.6662
DPEP2	0.52667	1.05316	10.8627	5.5161e-24	2.58594e-22	43.6046
SLCO2B1	1.22023	3.10207	10.8517	6.04416e-24	2.8256e-22	43.5141
IGLL5	2.43886	2.96544	10.8492	6.16687e-24	2.87496e-22	43.4942
APOBR	0.903842	2.11236	10.8332	7.04006e-24	3.27295e-22	43.3632
IRF1	0.986675	4.73742	10.8305	7.19785e-24	3.33706e-22	43.3413
HLA-DQB2	1.56333	3.18912	10.8281	7.34025e-24	3.3937e-22	43.3219
MILR1	1.03333	2.68997	10.8229	7.66139e-24	3.53245e-22	43.2795
ALOX5	1.22412	3.92118	10.8203	7.82802e-24	3.59174e-22	43.2582
GPR174	0.495282	0.440573	10.8202	7.83279e-24	3.59174e-22	43.2576
RGS1	1.43722	4.60543	10.7987	9.35309e-24	4.27719e-22	43.0821
WDFY4	0.66558	1.06926	10.7933	9.77767e-24	4.4592e-22	43.0381
UBE2L6	0.938107	7.40863	10.7909	9.97413e-24	4.53647e-22	43.0185
PTCRA	0.297854	0.372534	10.7143	1.8724e-23	8.49313e-22	42.3953
NLRP3	0.665252	1.2686	10.6989	2.12414e-23	9.60901e-22	42.2705
STAP1	0.489817	0.61954	10.6848	2.38575e-23	1.07453e-21	42.1556
LHFPL2	0.734519	3.57217	10.6846	2.38813e-23	1.07453e-21	42.1546
INPP5D	1.01565	2.67052	10.6616	2.8838e-23	1.29409e-21	41.968
IL16	0.689371	1.46957	10.6553	3.03707e-23	1.35923e-21	41.9167
SQRDL	0.917918	3.8638	10.6096	4.4137e-23	1.97008e-21	41.5469
CLECL1	0.468667	0.820017	10.5701	6.08789e-23	2.71016e-21	41.2288
NLRC5	0.875556	2.38235	10.5614	6.5397e-23	2.90359e-21	41.158
IFI35	0.979302	5.34275	10.5462	7.3978e-23	3.27592e-21	41.036
IDO1	1.67691	3.53053	10.524	8.86531e-23	3.91544e-21	40.857
FAIM3	0.801027	2.35813	10.5171	9.37508e-23	4.12971e-21	40.8017
P2RX7	0.712576	2.05274	10.4775	1.29327e-22	5.68194e-21	40.4835
KLRC1	0.450234	0.401671	10.4488	1.63249e-22	7.15356e-21	40.2531
CASP5	0.303784	0.350498	10.4273	1.94272e-22	8.49079e-21	40.0811
LCP1	1.13693	5.15803	10.3879	2.67026e-22	1.16402e-20	39.7665
MZB1	1.60914	2.20725	10.3812	2.81849e-22	1.22546e-20	39.713
GNB4	0.838099	2.934	10.3651	3.20983e-22	1.392e-20	39.5845
HTRA4	0.352549	0.448293	10.3356	4.07318e-22	1.76186e-20	39.3489
APOE	1.10037	8.44272	10.3293	4.28448e-22	1.84849e-20	39.2989
LAX1	0.676514	0.714662	10.3175	4.71329e-22	2.02829e-20	39.2046
IL15	0.824283	1.6521	10.2677	7.02996e-22	3.01749e-20	38.8092
KMO	0.366312	0.652578	10.2523	7.95433e-22	3.40555e-20	38.6871
PECAM1	0.830132	4.01576	10.1977	1.23241e-21	5.26299e-20	38.2542
CLEC10A	0.894452	1.22082	10.1955	1.25399e-21	5.34157e-20	38.237
MAN1A1	1.18941	3.70928	10.1881	1.33057e-21	5.65342e-20	38.1784
ARL11	0.640608	1.37897	10.181	1.40753e-21	5.96529e-20	38.1228
DRAM1	0.802077	3.48742	10.176	1.46493e-21	6.19292e-20	38.0833
EMR2	0.618736	1.04158	10.1698	1.53985e-21	6.49328e-20	38.034
NOD2	0.652183	1.57317	10.1644	1.60816e-21	6.76435e-20	37.9911
EPSTI1	1.09795	3.80449	10.1568	1.70859e-21	7.16883e-20	37.9312
CCL3	1.08743	2.97728	10.1439	1.8936e-21	7.92528e-20	37.8296
TNFSF10	1.44054	6.28014	10.1324	2.07532e-21	8.66418e-20	37.739
MPP1	0.716945	3.00802	10.1192	2.30626e-21	9.60446e-20	37.6347
CD1D	0.534772	1.31848	10.1177	2.33339e-21	9.69339e-20	37.6231
LILRA6	0.490701	0.880793	10.0855	3.01524e-21	1.2495e-19	37.3697
CCL2	1.19209	5.52251	10.0754	3.26592e-21	1.35005e-19	37.2908
TIFAB	0.285674	0.257145	10.0659	3.52156e-21	1.45215e-19	37.2163
VMO1	0.887256	2.61779	10.0301	4.68089e-21	1.92548e-19	36.935
ITGA4	0.748029	1.47705	10.0254	4.85794e-21	1.99342e-19	36.8983
BATF2	1.02418	2.97268	9.99287	6.28419e-21	2.57238e-19	36.6439
IGSF21	0.833105	1.61012	9.97692	7.12933e-21	2.91123e-19	36.5191
ZC3H12D	0.359906	0.643856	9.9663	7.7533e-21	3.15834e-19	36.4362
CCL4L1	1.20892	2.91327	9.914	1.1712e-20	4.7594e-19	36.0286
FCRL3	0.26314	0.247169	9.91198	1.18999e-20	4.82407e-19	36.0128
GAL3ST4	0.945972	3.55629	9.90265	1.28073e-20	5.17938e-19	35.9402
GPNMB	1.3091	5.37912	9.89421	1.36872e-20	5.52193e-19	35.8746
CFD	1.06974	4.12236	9.84183	2.06541e-20	8.31265e-19	35.468
NLRC4	0.435104	1.19302	9.83709	2.14369e-20	8.60706e-19	35.4312
EMP3	0.807437	5.25189	9.81398	2.56941e-20	1.02917e-18	35.2523
SLC2A5	0.853226	1.95589	9.79758	2.92143e-20	1.16739e-18	35.1254
HMHA1	0.809448	3.22058	9.77673	3.43854e-20	1.37076e-18	34.9644
CYSLTR1	0.680735	0.878017	9.77184	3.57258e-20	1.42082e-18	34.9266
LYL1	0.610032	2.25089	9.76668	3.71947e-20	1.47574e-18	34.8868
LIPM	0.249269	0.268723	9.75974	3.92657e-20	1.55423e-18	34.8333
CCL19	1.19719	1.49402	9.73896	4.6181e-20	1.82366e-18	34.673
LYN	0.762174	4.26793	9.69954	6.27759e-20	2.47316e-18	34.3697
MFSD1	0.613061	4.56735	9.69843	6.33239e-20	2.48891e-18	34.3612
TIMD4	0.781998	0.918703	9.69003	6.75956e-20	2.6506e-18	34.2967
FUT7	0.304731	0.404699	9.64759	9.39904e-20	3.67702e-18	33.9711
ATP8B4	0.351358	0.615114	9.64144	9.85809e-20	3.84763e-18	33.924
CCL23	0.416084	0.498039	9.62265	1.14033e-19	4.44042e-18	33.7801
KCNA3	0.478804	0.58991	9.59887	1.37073e-19	5.32523e-18	33.5984
ZEB2	0.653971	1.63704	9.59226	1.44259e-19	5.59147e-18	33.5479
GAPT	0.815725	1.48333	9.56754	1.74622e-19	6.75273e-18	33.3593
CRTAM	0.577638	0.761616	9.53622	2.22328e-19	8.57777e-18	33.1207
FMNL1	0.688287	3.66849	9.53292	2.28046e-19	8.7782e-18	33.0957
VAV1	0.922556	2.73	9.49394	3.07812e-19	1.18215e-17	32.7995
TLR10	0.420786	0.533727	9.48349	3.33549e-19	1.27807e-17	32.7202
TRIM21	0.637108	4.92492	9.4684	3.74518e-19	1.43179e-17	32.6058
CCL22	0.619302	0.847368	9.45389	4.18593e-19	1.59665e-17	32.496
ELL2	0.750143	2.31935	9.45029	4.30321e-19	1.63766e-17	32.4687
DNAJC5B	0.362234	0.473827	9.44633	4.43588e-19	1.68433e-17	32.4387
PDE4B	0.78395	1.78178	9.4425	4.56788e-19	1.73054e-17	32.4097
MCTP1	0.409078	0.743069	9.42278	5.31219e-19	2.00799e-17	32.2607
LAIR2	0.333158	0.345026	9.4148	5.64665e-19	2.12961e-17	32.2004
LILRA1	0.430577	0.724083	9.4035	6.15603e-19	2.31652e-17	32.1152
LILRA4	0.379037	0.382712	9.39631	6.50368e-19	2.44186e-17	32.0609
C4orf32	0.447676	1.0599	9.38526	7.07663e-19	2.65105e-17	31.9776
SLC31A2	0.429256	0.872056	9.33744	1.01887e-18	3.8084e-17	31.6178
SPP1	1.23807	8.63694	9.33682	1.02366e-18	3.81779e-17	31.6131
CCL13	1.09803	1.35958	9.29928	1.36179e-18	5.0676e-17	31.3314
NCR1	0.241827	0.300982	9.2906	1.45455e-18	5.40084e-17	31.2664
LTB	1.44956	3.63462	9.28482	1.51971e-18	5.63031e-17	31.2231
TAP2	0.848255	3.76386	9.28178	1.5552e-18	5.74911e-17	31.2003
TMEM176B	1.25918	5.70282	9.27324	1.65916e-18	6.11994e-17	31.1365
SAMD9L	0.960165	3.40892	9.27135	1.68315e-18	6.19482e-17	31.1223
PRDM1	0.753268	2.48217	9.26649	1.74622e-18	6.41288e-17	31.086
TNFRSF11A	0.569354	1.112	9.26564	1.7576e-18	6.44056e-17	31.0796
JAKMIP1	0.279941	0.427016	9.2591	1.84684e-18	6.75285e-17	31.0307
CSF3R	1.06304	2.38983	9.24811	2.00694e-18	7.32229e-17	30.9487
PKIB	0.775012	2.02521	9.24349	2.07844e-18	7.55693e-17	30.9141
CMKLR1	0.858136	2.07335	9.24337	2.08026e-18	7.55693e-17	30.9132
RHOG	0.429845	6.79052	9.23165	2.27302e-18	8.23934e-17	30.8258
IL7	0.508111	0.892314	9.2259	2.3741e-18	8.58719e-17	30.7828
LACTB	0.470069	3.14245	9.22214	2.44251e-18	8.81564e-17	30.7548
TLR6	0.540666	1.01969	9.22162	2.4521e-18	8.83123e-17	30.7509
XCR1	0.310391	0.299341	9.2135	2.60726e-18	9.36995e-17	30.6904
CD200R1	0.481291	1.21311	9.2029	2.82427e-18	1.01281e-16	30.6115
PTGDR	0.245889	0.332464	9.18833	3.15237e-18	1.12806e-16	30.503
MMP9	1.64827	4.66477	9.17366	3.52084e-18	1.25724e-16	30.394
TM6SF1	0.604725	1.32782	9.17266	3.54753e-18	1.26408e-16	30.3865
C1S	1.16677	6.12802	9.14817	4.26534e-18	1.51664e-16	30.2047
IL27	0.282878	0.398145	9.13655	4.65456e-18	1.65153e-16	30.1185
PLCB2	0.787333	2.36797	9.13372	4.75443e-18	1.68341e-16	30.0976
PILRA	0.740198	3.87571	9.12296	5.15439e-18	1.82118e-16	30.0179
CIITA	1.07881	2.98327	9.12107	5.22821e-18	1.84338e-16	30.0039
SOWAHD	0.508396	1.43028	9.0946	6.37616e-18	2.24342e-16	29.808
CLEC12A	0.631896	0.961359	9.07872	7.18091e-18	2.52128e-16	29.6908
ABCD2	0.138255	0.160606	9.07576	7.34213e-18	2.5725e-16	29.6688
EMR1	0.595959	0.895823	9.05441	8.61243e-18	3.0113e-16	29.5114
LAP3	0.723992	6.20072	9.05413	8.63057e-18	3.01137e-16	29.5093
IFFO1	0.654761	1.88081	9.05182	8.78086e-18	3.05745e-16	29.4923
FOLR2	1.01065	4.117	9.05065	8.85785e-18	3.07787e-16	29.4837
MDFIC	0.860477	2.86357	9.04344	9.34832e-18	3.24159e-16	29.4305
SIRPB1	0.536988	0.907513	9.04118	9.50701e-18	3.28982e-16	29.4139
FCN1	0.82427	1.46432	9.035	9.95626e-18	3.43819e-16	29.3684
APOBEC3A	0.752833	1.26183	9.03463	9.98323e-18	3.44042e-16	29.3657
CD79A	1.48377	2.37746	9.01246	1.17777e-17	4.05053e-16	29.2027
HLA-DQA2	1.79869	3.94053	8.99357	1.35564e-17	4.65269e-16	29.0639
IFNGR1	0.59379	6.0681	8.97367	1.57186e-17	5.38379e-16	28.918
RARRES3	1.27851	6.8333	8.96792	1.64049e-17	5.60742e-16	28.8758
SECTM1	1.28276	4.68624	8.94319	1.97092e-17	6.72317e-16	28.6948
LILRA2	0.481438	0.890328	8.93905	2.03244e-17	6.91894e-16	28.6645
BTN3A3	0.745649	4.18148	8.93299	2.12586e-17	7.22233e-16	28.6202
TNFSF12	0.553548	4.39117	8.92812	2.20389e-17	7.47229e-16	28.5847
LPAR5	0.774122	2.82519	8.92656	2.22953e-17	7.544e-16	28.5733
SH2D1B	0.332028	0.423781	8.91191	2.48496e-17	8.39138e-16	28.4663
HNMT	0.722451	3.46286	8.90797	2.55833e-17	8.62178e-16	28.4376
GPR82	0.604652	1.00526	8.8981	2.75206e-17	9.25607e-16	28.3656
IL9R	0.133263	0.130494	8.89726	2.7692e-17	9.29511e-16	28.3595
TGFBI	1.11946	5.4171	8.87674	3.22262e-17	1.07955e-15	28.21
CERKL	0.546786	1.80913	8.85894	3.67466e-17	1.22852e-15	28.0805
C5AR1	0.912469	3.74759	8.85324	3.83232e-17	1.27868e-15	28.0391
PARVG	0.654085	2.26192	8.84912	3.95062e-17	1.31554e-15	28.0091
ACP5	0.977886	4.90477	8.81184	5.19739e-17	1.72728e-15	27.7387
SOD2	0.853445	4.62817	8.81109	5.22607e-17	1.73338e-15	27.7333
CD6	0.738784	1.61433	8.80807	5.343e-17	1.76867e-15	27.7115
TNFRSF17	0.778019	0.892539	8.79899	5.71155e-17	1.88695e-15	27.6457
PPP1R18	0.697402	4.77505	8.78343	6.40258e-17	2.11109e-15	27.5331
APOL1	1.18786	6.06862	8.7817	6.48421e-17	2.13381e-15	27.5206
ARRDC5	0.297594	0.448541	8.7752	6.80039e-17	2.23348e-15	27.4737
STAB1	0.975268	3.69855	8.76481	7.33852e-17	2.40552e-15	27.3986
P2RY14	0.376365	0.591097	8.75363	7.9641e-17	2.60549e-15	27.318
GPBAR1	0.429566	1.11675	8.72528	9.79829e-17	3.19931e-15	27.1137
TGFB1	0.856315	5.58606	8.72386	9.90039e-17	3.22637e-15	27.1034
PLEKHO2	0.65172	4.57052	8.709	1.1034e-16	3.58882e-15	26.9966
PYCARD	0.754654	4.8625	8.70525	1.13401e-16	3.68126e-15	26.9696
HPSE	0.835906	2.95579	8.7018	1.16291e-16	3.76779e-15	26.9448
WARS	0.765299	5.96545	8.69706	1.20376e-16	3.89263e-15	26.9108
SLC15A3	1.01432	4.31814	8.6748	1.41559e-16	4.56881e-15	26.751
C19orf35	0.342548	0.737467	8.66853	1.48172e-16	4.77307e-15	26.706
RASSF4	0.63857	2.80114	8.66587	1.51068e-16	4.85703e-15	26.687
RASGRP3	0.398857	1.25595	8.66162	1.55809e-16	4.99988e-15	26.6565
OASL	1.20147	3.51744	8.6565	1.61705e-16	5.17917e-15	26.6199
CARD17	0.51963	0.684994	8.6442	1.76828e-16	5.65276e-15	26.5318
DAPP1	0.794205	2.27215	8.63847	1.8433e-16	5.8814e-15	26.4908
ADAM8	0.921223	3.93336	8.63791	1.85075e-16	5.89395e-15	26.4869
RTP4	1.10384	5.00317	8.63584	1.87876e-16	5.97181e-15	26.4721
MS4A14	0.434244	0.800343	8.63414	1.9021e-16	6.03457e-15	26.4599
SIGLEC5	0.285659	0.41997	8.63057	1.95199e-16	6.18117e-15	26.4344
FPR2	0.389651	0.495673	8.62245	2.0704e-16	6.54378e-15	26.3764
TMEM86A	0.573995	2.52669	8.61587	2.17155e-16	6.85059e-15	26.3294
STK17B	0.713	4.09848	8.56981	3.02985e-16	9.54033e-15	26.0012
P2RY6	0.841817	2.77036	8.56582	3.11847e-16	9.801e-15	25.9728
RENBP	0.801394	3.32421	8.55633	3.33948e-16	1.0476e-14	25.9053
OSM	0.898696	2.09287	8.52416	4.21036e-16	1.31833e-14	25.677
GNG2	0.608099	1.94454	8.5225	4.2612e-16	1.33176e-14	25.6652
LGALS9	0.854804	5.29595	8.50911	4.69167e-16	1.46357e-14	25.5704
RAB31	0.834851	4.51697	8.48931	5.40854e-16	1.68407e-14	25.4303
NMI	0.571641	5.10665	8.48458	5.59521e-16	1.73897e-14	25.3969
KCNMB1	0.460347	1.02903	8.46819	6.29298e-16	1.95222e-14	25.2811
HLA-DOB	0.838487	2.28244	8.45835	6.75246e-16	2.09089e-14	25.2117
CTSL	0.61542	6.63125	8.45339	6.99672e-16	2.16254e-14	25.1767
TLR3	0.68542	2.54213	8.44648	7.35147e-16	2.26801e-14	25.128
CEACAM21	0.539925	1.01434	8.4214	8.79458e-16	2.70825e-14	24.9515
CLEC6A	0.252736	0.265411	8.42048	8.85197e-16	2.72093e-14	24.9451
ARHGAP18	0.586769	3.52284	8.41141	9.44407e-16	2.89762e-14	24.8813
IL1B	0.944631	2.65662	8.39411	1.06841e-15	3.27209e-14	24.7598
OSTF1	0.56206	5.53053	8.38061	1.17619e-15	3.59562e-14	24.6652
CLEC5A	0.844595	2.2289	8.35718	1.38939e-15	4.23966e-14	24.5011
CCDC109B	0.788394	4.01167	8.35455	1.41561e-15	4.31182e-14	24.4827
CTSO	0.680621	4.70856	8.34901	1.47245e-15	4.47683e-14	24.444
PLSCR1	0.780475	6.00568	8.34574	1.50701e-15	4.57363e-14	24.4211
APOC2	0.371106	0.574201	8.33553	1.62016e-15	4.90814e-14	24.3498
PIM2	0.690067	4.93764	8.32802	1.70879e-15	5.16733e-14	24.2974
CD58	0.589661	3.9006	8.32519	1.7434e-15	5.26249e-14	24.2777
CEACAM4	0.308905	0.378435	8.30912	1.95363e-15	5.88649e-14	24.1656
KLRD1	0.25854	0.375375	8.30789	1.9706e-15	5.92699e-14	24.157
CYB5R4	0.429638	1.92926	8.30732	1.97856e-15	5.94029e-14	24.1531
TMEM154	0.373182	0.810123	8.27304	2.52092e-15	7.55511e-14	23.9146
AGAP2	0.403631	0.952478	8.24435	3.08602e-15	9.2322e-14	23.7155
IL10	0.74827	1.73753	8.24241	3.12854e-15	9.34276e-14	23.702
ASGR2	0.249388	0.377393	8.23429	3.31247e-15	9.87445e-14	23.6458
APOBEC3D	0.782622	2.5394	8.23104	3.38915e-15	1.00851e-13	23.6233
STOM	0.654894	5.79772	8.22794	3.46377e-15	1.02889e-13	23.6018
TMEM229B	0.622638	1.57109	8.21082	3.90659e-15	1.15838e-13	23.4834
PSTPIP1	0.584269	1.63676	8.20977	3.93559e-15	1.16492e-13	23.4761
IL4R	0.858149	3.49846	8.20293	4.12916e-15	1.22006e-13	23.4289
FGD2	0.601687	1.73095	8.20095	4.18679e-15	1.23492e-13	23.4153
FAM105A	0.744434	2.91582	8.19512	4.36172e-15	1.28426e-13	23.375
CARD6	0.724242	2.60179	8.18504	4.68117e-15	1.3759e-13	23.3054
CCL11	1.37889	2.41108	8.17535	5.00991e-15	1.46995e-13	23.2386
ZBP1	0.801048	1.53212	8.17079	5.17221e-15	1.51492e-13	23.2072
SFMBT2	0.577875	1.35543	8.15994	5.5803e-15	1.63161e-13	23.1325
TNFAIP6	0.969266	2.59234	8.15166	5.9127e-15	1.72579e-13	23.0756
GM2A	0.437977	5.28109	8.15093	5.94298e-15	1.73162e-13	23.0705
CRYBB1	0.502433	1.45288	8.14939	6.00722e-15	1.7473e-13	23.06
GPR141	0.761453	1.25842	8.1482	6.05738e-15	1.75884e-13	23.0518
CD300E	0.55893	0.985791	8.14203	6.3245e-15	1.83323e-13	23.0093
GPR114	0.516376	0.751707	8.13244	6.76233e-15	1.95676e-13	22.9435
BTN3A1	0.637847	4.53533	8.1285	6.95044e-15	2.00773e-13	22.9165
CTSH	0.626503	5.02464	8.12722	7.01286e-15	2.02228e-13	22.9077
S100A9	1.63033	6.81232	8.12001	7.37447e-15	2.12291e-13	22.8582
LYSMD2	0.657066	3.71768	8.11821	7.46748e-15	2.14601e-13	22.8459
RAP2B	0.580341	4.77923	8.11106	7.84923e-15	2.25186e-13	22.7968
INPP4B	0.54253	1.21574	8.09961	8.50039e-15	2.43451e-13	22.7184
MRC1	0.820387	1.95246	8.0927	8.91899e-15	2.55004e-13	22.6711
STAT1	0.773829	6.77209	8.09183	8.97353e-15	2.56127e-13	22.6651
CLNK	0.14466	0.149824	8.0709	1.03784e-14	2.95722e-13	22.522
CHST11	0.767607	3.26579	8.05848	1.13125e-14	3.21792e-13	22.4372
DHX58	0.690901	3.35001	8.0569	1.14371e-14	3.24785e-13	22.4265
IFI16	0.882724	5.88614	8.05653	1.14664e-14	3.25069e-13	22.4239
FAM129A	0.88647	2.53909	8.04803	1.21618e-14	3.44201e-13	22.366
SH2B3	0.683977	3.69973	8.03873	1.29717e-14	3.66506e-13	22.3026
CSF1	0.987082	5.57695	8.03341	1.34583e-14	3.79615e-13	22.2664
CEBPE	0.124603	0.177213	8.01974	1.47926e-14	4.1655e-13	22.1734
IL32	0.981222	5.42161	8.0038	1.65148e-14	4.64267e-13	22.0651
C2	0.947062	4.54245	7.99644	1.73756e-14	4.8765e-13	22.0151
RAB27A	0.565321	3.17471	7.99165	1.79596e-14	5.032e-13	21.9826
C15orf48	1.08893	4.00381	7.98903	1.8287e-14	5.11517e-13	21.9648
LRRK2	0.38718	0.675305	7.98651	1.86078e-14	5.19624e-13	21.9477
OSTM1	0.500452	3.24072	7.95138	2.36977e-14	6.60661e-13	21.7099
EMB	0.901443	3.25462	7.94285	2.51275e-14	6.98441e-13	21.6523
PLXNC1	0.588689	2.41836	7.94281	2.51361e-14	6.98441e-13	21.652
JAK2	0.488871	2.22466	7.93831	2.59246e-14	7.19163e-13	21.6216
VCAM1	1.07616	2.96502	7.93449	2.66126e-14	7.37029e-13	21.5959
TNFRSF4	0.628491	2.72621	7.92604	2.82015e-14	7.79745e-13	21.5388
CD44	0.818808	4.12575	7.92434	2.85322e-14	7.87591e-13	21.5274
TMEM106A	0.526274	2.60816	7.91389	3.06522e-14	8.44722e-13	21.4569
IFIT3	1.02665	6.01343	7.90772	3.1974e-14	8.79704e-13	21.4154
CD8B	0.864322	1.53789	7.90601	3.23506e-14	8.8861e-13	21.4039
PIK3R6	0.438613	1.22492	7.89875	3.39984e-14	9.32345e-13	21.355
ATP2A3	0.749148	2.35898	7.88448	3.74852e-14	1.02629e-12	21.2591
MEI1	0.534604	0.916962	7.88141	3.82805e-14	1.04635e-12	21.2384
MICB	0.925069	3.13539	7.8738	4.03224e-14	1.10038e-12	21.1873
OAS2	1.17348	5.1834	7.86448	4.29698e-14	1.17072e-12	21.1248
PLAUR	0.757665	4.43579	7.85585	4.55747e-14	1.23968e-12	21.067
KLHL6	0.454389	1.09083	7.85431	4.60553e-14	1.25072e-12	21.0566
NAGA	0.465208	4.95354	7.83364	5.30204e-14	1.43755e-12	20.9182
PLAU	1.18829	5.23361	7.83243	5.34572e-14	1.44705e-12	20.9101
SUCNR1	0.606587	1.07058	7.82917	5.46541e-14	1.47707e-12	20.8884
FBXO6	0.648594	4.74632	7.82231	5.72649e-14	1.54514e-12	20.8425
PCED1B	0.691056	2.91759	7.81383	6.06619e-14	1.63417e-12	20.7859
LIPA	0.606801	5.12958	7.81135	6.16945e-14	1.65933e-12	20.7693
NNMT	1.48984	5.38157	7.80924	6.25839e-14	1.68055e-12	20.7552
FGF17	-1.21443	1.00023	-7.80612	6.39245e-14	1.71381e-12	20.7344
HTR7	0.254548	0.372929	7.7891	7.17464e-14	1.92045e-12	20.6209
ST8SIA4	0.658252	2.13373	7.76648	8.36233e-14	2.23479e-12	20.4704
SLC11A1	0.582334	2.33929	7.76476	8.46018e-14	2.25735e-12	20.459
PSME2	0.532418	6.65462	7.74404	9.73172e-14	2.5925e-12	20.3214
NUGGC	0.3792	0.718778	7.74137	9.90848e-14	2.6354e-12	20.3037
MEF2C	0.513056	2.11463	7.72759	1.08737e-13	2.88755e-12	20.2123
FCRL5	0.387471	0.340313	7.72657	1.0949e-13	2.90296e-12	20.2056
SPHK1	0.799543	2.48995	7.72255	1.12499e-13	2.97803e-12	20.1789
TPST2	0.542501	3.72651	7.72229	1.12695e-13	2.97852e-12	20.1772
BST1	0.842651	2.95638	7.71824	1.15807e-13	3.05596e-12	20.1505
LPAR6	0.732944	3.09408	7.71458	1.18703e-13	3.12747e-12	20.1262
BLNK	0.631069	2.31906	7.7131	1.19891e-13	3.15381e-12	20.1164
RTN1	0.678327	1.65227	7.7117	1.21023e-13	3.17859e-12	20.1072
TNFSF8	0.678375	1.39378	7.70999	1.22429e-13	3.21051e-12	20.0958
FFAR4	0.443252	0.773864	7.70467	1.26886e-13	3.32221e-12	20.0607
RSAD2	1.02968	3.99377	7.6997	1.31206e-13	3.42995e-12	20.0278
TMEM176A	1.08878	4.76499	7.69838	1.32375e-13	3.4549e-12	20.0191
CTSZ	0.580712	7.55067	7.69815	1.32572e-13	3.4549e-12	20.0176
KCNAB2	0.57808	2.94348	7.68589	1.43961e-13	3.74588e-12	19.9367
CCL18	1.25687	1.98718	7.6781	1.51692e-13	3.94094e-12	19.8853
CCL7	0.879981	1.45271	7.66347	1.67332e-13	4.34054e-12	19.7889
FCAR	0.35811	0.519431	7.65976	1.7155e-13	4.4431e-12	19.7644
GCH1	0.577837	2.99419	7.65602	1.75898e-13	4.5487e-12	19.7398
MEFV	0.233223	0.38444	7.65191	1.80807e-13	4.66844e-12	19.7128
DDX60	0.762106	3.31916	7.6499	1.83256e-13	4.7244e-12	19.6996
CACNA2D4	0.352256	1.14612	7.60228	2.51902e-13	6.48416e-12	19.3871
APOC4-APOC2	0.190508	0.280579	7.5926	2.6868e-13	6.90546e-12	19.3238
KLRK1	0.152476	0.170513	7.59215	2.69492e-13	6.91571e-12	19.3208
IRF2	0.390783	5.13547	7.57224	3.07666e-13	7.8833e-12	19.1907
TNFRSF14	0.679998	3.71892	7.56176	3.29845e-13	8.4387e-12	19.1224
IL4I1	1.13805	5.91617	7.55246	3.50853e-13	8.96252e-12	19.0618
TNFAIP8	0.549803	2.36581	7.54983	3.57016e-13	9.10607e-12	19.0447
MT2A	0.864551	8.13275	7.54902	3.58953e-13	9.1416e-12	19.0393
ADRB2	0.338501	0.642068	7.53369	3.97347e-13	1.01041e-11	18.9396
IGFL2	0.975509	1.40331	7.53068	4.05348e-13	1.02919e-11	18.92
DDX60L	0.561564	2.14122	7.52571	4.18892e-13	1.06197e-11	18.8877
FLVCR2	0.450819	1.59599	7.52413	4.23305e-13	1.07154e-11	18.8774
FCRLA	0.283038	0.313831	7.50902	4.67809e-13	1.18242e-11	18.7793
HAMP	0.575492	1.21382	7.50781	4.71564e-13	1.19011e-11	18.7715
ADAM19	0.677839	2.24747	7.50058	4.94603e-13	1.24626e-11	18.7246
PSME1	0.482763	8.37482	7.50037	4.95295e-13	1.24626e-11	18.7233
SAT1	0.734068	7.85115	7.46826	6.12108e-13	1.53788e-11	18.5154
STK10	0.534771	2.93189	7.46181	6.38664e-13	1.6022e-11	18.4737
COTL1	0.601649	5.03922	7.46095	6.42283e-13	1.60887e-11	18.4682
BTN3A2	0.645082	4.06878	7.43649	7.54266e-13	1.88657e-11	18.3104
PLEKHG4B	-0.879687	2.8391	-7.43088	7.82577e-13	1.95446e-11	18.2743
SGPP1	0.627322	3.12271	7.42378	8.19853e-13	2.04452e-11	18.2286
MAPK8IP1	-0.857335	5.35252	-7.42235	8.27602e-13	2.06078e-11	18.2194
MARCO	1.01208	2.29637	7.42206	8.29182e-13	2.06165e-11	18.2175
SOCS1	0.709354	4.36294	7.41883	8.46883e-13	2.10255e-11	18.1968
C10orf54	0.744594	4.51622	7.41059	8.93879e-13	2.21595e-11	18.1438
CBR3	0.843354	2.75609	7.40269	9.41345e-13	2.33017e-11	18.093
OGFRL1	0.487275	2.91124	7.37232	1.14792e-12	2.83734e-11	17.8984
ITGB7	0.558743	1.72617	7.36917	1.17177e-12	2.89203e-11	17.8782
PARP9	0.673217	4.81228	7.36669	1.19086e-12	2.93484e-11	17.8623
CASP4	0.54461	4.36924	7.36202	1.2277e-12	3.02118e-11	17.8324
APOL2	0.690942	5.01092	7.35154	1.31446e-12	3.22995e-11	17.7654
SERPINF1	1.15613	5.63751	7.33055	1.50669e-12	3.69689e-11	17.6316
ICAM1	1.06702	5.45161	7.32922	1.51982e-12	3.72367e-11	17.623
TAPBP	0.565135	7.60471	7.30567	1.77076e-12	4.33217e-11	17.4731
DLEU7	0.282129	0.716065	7.29811	1.8597e-12	4.54314e-11	17.4251
OPTN	0.566495	5.69619	7.29551	1.89119e-12	4.61336e-11	17.4086
CD209	0.726345	1.64292	7.28867	1.97694e-12	4.81553e-11	17.3651
CTSK	1.30753	5.37814	7.28303	2.05042e-12	4.98728e-11	17.3293
CYLD	0.429618	2.46605	7.2821	2.06273e-12	5.00995e-11	17.3235
BATF3	0.362203	1.18639	7.27632	2.14127e-12	5.1932e-11	17.2868
PAG1	0.449811	1.70841	7.27154	2.2085e-12	5.34853e-11	17.2565
PARP14	0.706826	4.81955	7.26792	2.26072e-12	5.4671e-11	17.2336
TNIP3	0.462899	0.602985	7.26621	2.28576e-12	5.5197e-11	17.2228
IL12B	0.0988552	0.117264	7.26189	2.35052e-12	5.66792e-11	17.1954
TNFRSF13B	0.13768	0.125673	7.24773	2.5752e-12	6.20079e-11	17.1059
STAC3	0.451406	2.17731	7.23542	2.78773e-12	6.70294e-11	17.0281
IFIH1	0.793204	4.22233	7.23059	2.87575e-12	6.90467e-11	16.9976
IL1RN	0.742764	3.78667	7.21914	3.09553e-12	7.42175e-11	16.9254
CAPG	0.554228	6.96724	7.21177	3.24568e-12	7.77065e-11	16.879
GPR68	0.596261	1.4508	7.20156	3.46569e-12	8.28556e-11	16.8147
SULF1	1.28694	4.56373	7.1997	3.50716e-12	8.37278e-11	16.803
CASS4	0.426579	1.2268	7.19295	3.66233e-12	8.73081e-11	16.7606
TRPM2	0.576661	2.97407	7.17694	4.05802e-12	9.66039e-11	16.66
P2RY12	0.485936	0.689504	7.16598	4.35253e-12	1.03468e-10	16.5913
OAS1	0.944343	5.21027	7.16408	4.40579e-12	1.04586e-10	16.5794
GK	0.417239	1.85142	7.14179	5.07988e-12	1.20418e-10	16.4399
A2M	0.724218	6.66697	7.12574	5.62707e-12	1.332e-10	16.3396
CD1C	0.651318	1.04562	7.11634	5.9737e-12	1.41207e-10	16.281
MS4A1	0.383978	0.343106	7.10389	6.46584e-12	1.52604e-10	16.2035
FBP1	0.851365	4.14457	7.10369	6.47407e-12	1.52604e-10	16.2022
PSTPIP2	0.706248	2.77543	7.10103	6.58474e-12	1.54995e-10	16.1856
DTX3L	0.601227	5.7812	7.07773	7.6334e-12	1.79428e-10	16.0408
ARHGAP31	0.590094	2.2077	7.07467	7.78281e-12	1.82684e-10	16.0218
NAAA	0.606529	3.08537	7.07392	7.82034e-12	1.83308e-10	16.0171
LRRC8C	0.429828	1.7547	7.06603	8.22099e-12	1.92431e-10	15.9682
RCOR2	-1.0202	3.80943	-7.05364	8.89082e-12	2.0782e-10	15.8914
TMEM198	-0.697986	2.40513	-7.05312	8.92039e-12	2.08221e-10	15.8882
CD28	0.361172	0.858988	7.04819	9.2026e-12	2.14326e-10	15.8577
GPR25	0.531116	0.767202	7.0481	9.20749e-12	2.14326e-10	15.8571
CD40	0.701465	4.32293	7.0448	9.40147e-12	2.18539e-10	15.8367
DNAH6	-0.417422	0.725451	-7.04222	9.55626e-12	2.21829e-10	15.8207
NR1H3	0.419735	3.88289	7.0313	1.02377e-11	2.3732e-10	15.7532
RAB32	0.540333	5.78829	7.01763	1.11591e-11	2.58322e-10	15.6688
DAB2	0.668563	3.82401	7.01667	1.12268e-11	2.5953e-10	15.6629
NEK5	-0.481566	1.45969	-7.01573	1.12934e-11	2.60711e-10	15.6571
PLEK2	0.627971	3.11767	7.01524	1.13283e-11	2.61157e-10	15.6541
TMEM140	0.590175	4.49858	7.01366	1.14418e-11	2.63413e-10	15.6443
TDO2	0.882803	1.86212	7.00596	1.201e-11	2.76115e-10	15.5969
SERPINB1	0.593331	5.85734	7.00108	1.23842e-11	2.84329e-10	15.5668
CMPK2	0.861669	3.79374	6.99544	1.28309e-11	2.94183e-10	15.5321
LMO2	0.57514	3.26371	6.98599	1.36152e-11	3.11738e-10	15.474
XXbac-BPG181M17.5	0.345112	0.549207	6.97639	1.44606e-11	3.30644e-10	15.415
VENTX	0.393117	0.836715	6.97447	1.46357e-11	3.34192e-10	15.4032
PTPRO	0.473126	1.25983	6.95733	1.62949e-11	3.71572e-10	15.2981
HTATIP2	0.618013	4.45029	6.95344	1.66966e-11	3.80216e-10	15.2742
HPGDS	0.534462	1.53806	6.9494	1.71242e-11	3.89424e-10	15.2495
CCDC181	-0.628788	1.15999	-6.94821	1.72517e-11	3.91794e-10	15.2422
S100A8	1.29258	3.77075	6.94582	1.75111e-11	3.97148e-10	15.2276
LKAAEAR1	-0.799182	1.81972	-6.94516	1.75839e-11	3.9826e-10	15.2235
CLEC9A	0.211264	0.229998	6.94246	1.78836e-11	4.04502e-10	15.207
CATSPER1	0.304841	0.657716	6.93972	1.8192e-11	4.10925e-10	15.1902
C1R	0.742909	6.3325	6.93361	1.89001e-11	4.26345e-10	15.1529
LACC1	0.44406	1.92762	6.91645	2.10354e-11	4.73875e-10	15.0481
CEACAM1	0.830383	2.4722	6.91317	2.147e-11	4.83017e-10	15.028
ANXA2R	0.47783	1.1274	6.90529	2.25497e-11	5.06628e-10	14.98
YWHAH	0.449919	7.22171	6.90198	2.30187e-11	5.16475e-10	14.9599
MVP	0.55059	5.70079	6.89826	2.3557e-11	5.27847e-10	14.9372
CD300LB	0.301499	0.599665	6.8968	2.37723e-11	5.3196e-10	14.9283
BHLHE22	0.38094	0.528097	6.89237	2.44369e-11	5.46104e-10	14.9013
PHF11	0.394471	3.90112	6.88601	2.54221e-11	5.67366e-10	14.8627
PPM1M	0.432716	3.84777	6.87768	2.67714e-11	5.96686e-10	14.812
SMAP2	0.486617	4.84082	6.86918	2.82205e-11	6.28149e-10	14.7604
STARD8	0.461323	1.68986	6.86881	2.82862e-11	6.28778e-10	14.7582
TPP1	0.47471	6.46606	6.86723	2.85644e-11	6.34122e-10	14.7486
ARPC1B	0.531185	6.97714	6.85511	3.07913e-11	6.82655e-10	14.6751
ARRB1	0.495114	2.6757	6.84497	3.27852e-11	7.25903e-10	14.6137
CCDC173	-0.652634	1.52592	-6.84426	3.29293e-11	7.28132e-10	14.6094
SCARF1	0.431105	2.07277	6.83641	3.45679e-11	7.63359e-10	14.5619
GBP3	0.893751	4.05217	6.822	3.7785e-11	8.33307e-10	14.4748
FBN3	-1.11217	2.38707	-6.82126	3.7958e-11	8.36022e-10	14.4704
SPPL2A	0.389902	3.97633	6.81935	3.84061e-11	8.44783e-10	14.4589
CD1E	0.609735	0.745117	6.81818	3.86859e-11	8.49823e-10	14.4518
DCK	0.466984	4.82893	6.81495	3.94641e-11	8.65785e-10	14.4323
MICAL1	0.5647	2.81864	6.81122	4.03806e-11	8.84736e-10	14.4098
LAMP3	0.955396	3.7726	6.80806	4.11761e-11	9.00592e-10	14.3907
MSN	0.571634	7.31997	6.80792	4.12116e-11	9.00592e-10	14.3899
C1orf54	0.40646	3.45757	6.79576	4.44151e-11	9.69336e-10	14.3167
ZNF286A	-0.387772	1.85216	-6.79474	4.4695e-11	9.74177e-10	14.3105
SIRPA	0.718728	4.59898	6.79405	4.48839e-11	9.77025e-10	14.3064
ANKRD13B	-0.689607	2.80211	-6.7806	4.87536e-11	1.05988e-09	14.2255
HHEX	0.584809	2.63367	6.77986	4.89739e-11	1.0633e-09	14.2211
FAM49B	0.467977	4.77706	6.77827	4.94544e-11	1.07234e-09	14.2115
MAFB	0.680178	5.43124	6.77495	5.04745e-11	1.09305e-09	14.1916
SLC46A3	0.553756	3.09884	6.75148	5.82857e-11	1.26058e-09	14.0508
CDCP1	0.701886	4.49552	6.74849	5.9363e-11	1.28222e-09	14.0329
OSMR	0.723759	4.31692	6.74394	6.10377e-11	1.3167e-09	14.0057
TRIM69	0.402266	3.83411	6.74152	6.19465e-11	1.33459e-09	13.9912
ODF3B	0.755192	4.18873	6.7363	6.39582e-11	1.37617e-09	13.96
PLAC8	0.441739	1.14868	6.73503	6.44548e-11	1.3845e-09	13.9524
DERL3	0.794957	3.5937	6.73489	6.45103e-11	1.3845e-09	13.9516
NAGK	0.316976	4.54441	6.71674	7.20687e-11	1.54474e-09	13.8432
LRRC48	-0.521576	1.68366	-6.70462	7.75986e-11	1.66115e-09	13.7709
RASGRP4	0.445792	1.33755	6.70063	7.95061e-11	1.69981e-09	13.7472
SDCBP	0.388875	6.24854	6.69356	8.3001e-11	1.77227e-09	13.7051
IFIT2	0.847523	4.3402	6.69016	8.47353e-11	1.807e-09	13.6849
TCIRG1	0.649953	5.51455	6.68816	8.57721e-11	1.82679e-09	13.673
CCL17	0.622129	1.02502	6.67489	9.29758e-11	1.97543e-09	13.5942
RIPK3	0.620141	2.75739	6.67487	9.29861e-11	1.97543e-09	13.5941
UPP1	0.650956	2.82783	6.67213	9.45485e-11	2.00608e-09	13.5778
ZNF831	0.176731	0.190359	6.67156	9.48737e-11	2.01044e-09	13.5744
RAB8B	0.409275	3.13032	6.65854	1.02669e-10	2.17288e-09	13.4972
NR3C1	0.50127	3.68589	6.65538	1.04654e-10	2.2121e-09	13.4785
OLFML2B	0.962625	4.02171	6.6548	1.05025e-10	2.21715e-09	13.4751
COL2A1	-1.07918	1.2323	-6.64765	1.0967e-10	2.3123e-09	13.4328
HIVEP3	0.421331	1.50087	6.63417	1.18985e-10	2.50556e-09	13.3531
C19orf38	0.534728	2.02293	6.63197	1.20578e-10	2.53592e-09	13.3401
DUSP10	0.774495	3.50138	6.62961	1.22306e-10	2.56904e-09	13.3262
MSC	0.906517	2.54592	6.622	1.28064e-10	2.68661e-09	13.2812
GRN	0.500583	8.44929	6.62005	1.29574e-10	2.71491e-09	13.2698
B3GALT4	0.513307	3.5808	6.61901	1.30391e-10	2.72862e-09	13.2636
RNF19B	0.533154	5.58261	6.61566	1.33056e-10	2.78091e-09	13.2438
PLD4	0.682853	1.76833	6.60878	1.38694e-10	2.89515e-09	13.2033
CSTA	0.766515	2.87049	6.60527	1.41652e-10	2.95323e-09	13.1827
LRRC16B	-0.390298	0.763143	-6.6023	1.44208e-10	3.00279e-09	13.1652
ARHGAP25	0.42105	2.65578	6.59599	1.49791e-10	3.11517e-09	13.1281
NRROS	0.545954	2.79582	6.58613	1.58948e-10	3.29906e-09	13.0701
IGFLR1	0.403249	2.09596	6.58605	1.59026e-10	3.29906e-09	13.0696
RNASE1	0.765927	8.81333	6.57939	1.65514e-10	3.42941e-09	13.0305
FAS	0.572164	3.69995	6.56536	1.80061e-10	3.72621e-09	12.9482
RAMP3	0.490579	2.59497	6.56379	1.81764e-10	3.75683e-09	12.939
HVCN1	0.416813	2.18038	6.56339	1.82205e-10	3.76131e-09	12.9367
FTH1	0.566289	11.2599	6.56191	1.83821e-10	3.79e-09	12.9281
MRO	0.238863	0.569978	6.55601	1.90443e-10	3.92173e-09	12.8935
SELP	0.453101	0.988882	6.5549	1.91711e-10	3.94299e-09	12.887
RNF213	0.648113	4.46705	6.55445	1.92223e-10	3.94868e-09	12.8844
HGF	0.34363	0.689026	6.55255	1.94428e-10	3.9891e-09	12.8732
PSAP	0.470553	9.92071	6.54515	2.03235e-10	4.1647e-09	12.83
CLEC1A	0.324389	1.1128	6.54295	2.05932e-10	4.21483e-09	12.8171
TMEM200A	0.559048	1.54979	6.53421	2.16975e-10	4.43543e-09	12.7661
IFI44L	0.91142	4.32447	6.51448	2.44098e-10	4.98382e-09	12.651
TNFAIP3	0.697571	4.36796	6.50854	2.52892e-10	5.15708e-09	12.6165
HERPUD1	0.431126	5.62621	6.50415	2.59598e-10	5.28742e-09	12.5909
MAF	0.658651	3.52029	6.49508	2.7399e-10	5.5738e-09	12.5382
CD70	0.58756	1.00121	6.49336	2.76816e-10	5.62446e-09	12.5282
PTGIR	0.470455	1.40584	6.48992	2.82531e-10	5.73199e-09	12.5082
TICAM2	0.0855404	0.1636	6.48976	2.82791e-10	5.73199e-09	12.5073
NFKBIE	0.495784	4.51804	6.4853	2.90404e-10	5.8792e-09	12.4814
VDR	0.695221	3.36698	6.48262	2.9506e-10	5.96625e-09	12.4659
LGALS1	0.669397	9.09102	6.47572	3.07407e-10	6.20845e-09	12.4258
HEXB	0.400613	5.06813	6.46145	3.34549e-10	6.74849e-09	12.3432
HYDIN	-0.349281	0.630891	-6.45043	3.57117e-10	7.19507e-09	12.2795
FTL	0.398609	12.8039	6.44622	3.66112e-10	7.36745e-09	12.2552
UNC119B	-0.531364	4.367	-6.44527	3.68185e-10	7.4003e-09	12.2497
PKD2L1	0.162898	0.263791	6.43449	3.92414e-10	7.87785e-09	12.1875
HOPX	0.680844	2.74774	6.40574	4.64921e-10	9.31728e-09	12.022
ZNF660	-0.428088	1.6579	-6.40563	4.65226e-10	9.31728e-09	12.0213
TREML1	0.327881	0.758015	6.40541	4.65814e-10	9.31795e-09	12.0201
CTSC	0.544654	4.68609	6.40443	4.68517e-10	9.36085e-09	12.0145
CCDC69	0.569716	2.60282	6.40192	4.75487e-10	9.48883e-09	12.0001
ICA1L	-0.390631	1.53038	-6.39313	5.00717e-10	9.98044e-09	11.9496
FN1	1.20634	6.88495	6.38156	5.35944e-10	1.06699e-08	11.8832
B4GALNT4	-0.791642	4.6696	-6.36886	5.77392e-10	1.14815e-08	11.8106
MOB3C	0.47702	3.45238	6.36374	5.94972e-10	1.18171e-08	11.7813
KBTBD8	0.259613	0.724432	6.36313	5.97127e-10	1.18458e-08	11.7778
PRDM8	0.296354	0.66937	6.35756	6.16912e-10	1.22239e-08	11.746
LGMN	0.495601	6.09199	6.35152	6.39118e-10	1.2649e-08	11.7115
NFKB1	0.446653	4.27946	6.34821	6.51584e-10	1.28805e-08	11.6926
SERPINB9	0.499036	4.03042	6.34691	6.56564e-10	1.29637e-08	11.6852
WNK2	-0.79959	2.88319	-6.34543	6.62293e-10	1.30614e-08	11.6767
CYBA	0.525654	7.76261	6.34317	6.71075e-10	1.32191e-08	11.6639
SKAP2	0.636233	3.28578	6.33661	6.97291e-10	1.37194e-08	11.6265
CH25H	0.583433	1.48626	6.33028	7.23548e-10	1.42193e-08	11.5904
ENSG00000180044	0.667181	1.52656	6.32904	7.28797e-10	1.43011e-08	11.5834
MMP19	0.677443	2.68617	6.3289	7.29412e-10	1.43011e-08	11.5825
TBC1D10C	0.50681	2.2641	6.32702	7.37439e-10	1.44416e-08	11.5719
KBTBD6	-0.384832	3.017	-6.32649	7.39724e-10	1.44589e-08	11.5689
MTURN	-0.450806	3.52441	-6.32642	7.40048e-10	1.44589e-08	11.5684
PTPLAD2	0.412596	2.66763	6.3253	7.449e-10	1.45368e-08	11.5621
SPIRE2	-0.584073	2.09431	-6.32277	7.55957e-10	1.47355e-08	11.5477
TNFRSF18	0.844776	2.20413	6.32247	7.57278e-10	1.47441e-08	11.546
TTC23L	-0.284048	0.666952	-6.30657	8.30732e-10	1.61555e-08	11.4557
ENTPD1	0.342719	2.4762	6.30437	8.41435e-10	1.63447e-08	11.4432
ACVRL1	0.477405	2.51874	6.30193	8.53457e-10	1.6559e-08	11.4294
IFI27	1.11553	8.00151	6.2994	8.66134e-10	1.67856e-08	11.415
LITAF	0.514077	5.93877	6.28923	9.18832e-10	1.77863e-08	11.3574
IL18	0.662716	3.83182	6.27452	1.00071e-09	1.9349e-08	11.2741
FLT3LG	0.296481	1.26976	6.27229	1.01372e-09	1.95781e-08	11.2615
C10orf55	0.389112	0.93234	6.27178	1.0167e-09	1.9613e-08	11.2587
CPA3	0.575794	0.834808	6.27114	1.0205e-09	1.96637e-08	11.255
HERC5	0.758715	3.4542	6.26959	1.02972e-09	1.98186e-08	11.2463
MYD88	0.444598	5.58325	6.26913	1.03245e-09	1.98484e-08	11.2437
FOXN4	-0.759824	1.08922	-6.26827	1.03758e-09	1.99241e-08	11.2389
BSN	-0.47162	1.04074	-6.26465	1.05961e-09	2.03239e-08	11.2184
C10orf10	0.686012	5.30805	6.26368	1.06554e-09	2.04143e-08	11.2129
ME2	0.382668	3.7002	6.26085	1.08317e-09	2.07285e-08	11.1969
DCAF12L1	-0.84064	1.4389	-6.25984	1.08948e-09	2.08255e-08	11.1913
TTLL9	-0.508281	1.04592	-6.25464	1.12278e-09	2.14375e-08	11.1619
ISG20	0.560975	2.57682	6.25226	1.13834e-09	2.171e-08	11.1485
ACSL1	0.557351	3.60464	6.24707	1.17299e-09	2.23454e-08	11.1193
ABHD3	0.601879	2.74424	6.24664	1.17592e-09	2.23759e-08	11.1168
ATP6V0E1	0.374237	8.10937	6.24553	1.18343e-09	2.24932e-08	11.1106
MMP12	1.02848	1.72009	6.24213	1.20696e-09	2.29144e-08	11.0914
CLEC4D	0.175636	0.252146	6.24112	1.21399e-09	2.30219e-08	11.0858
MSMO1	0.491024	5.2847	6.23603	1.25021e-09	2.3682e-08	11.0571
WDR35	-0.468863	2.84101	-6.23274	1.27411e-09	2.41075e-08	11.0387
TMED7-TICAM2	0.0909639	0.211631	6.23205	1.27921e-09	2.41767e-08	11.0348
ABCB6	-0.354845	1.93402	-6.22791	1.31009e-09	2.47326e-08	11.0115
CCDC40	-0.609393	1.96077	-6.22008	1.37059e-09	2.58456e-08	10.9675
PRRX1	0.973318	2.56976	6.21511	1.41031e-09	2.65418e-08	10.9397
IRAK2	0.647245	2.2408	6.21507	1.41067e-09	2.65418e-08	10.9394
C2orf81	-0.573053	3.74302	-6.20751	1.47338e-09	2.76907e-08	10.897
ZNF10	-0.434524	2.17843	-6.20538	1.49152e-09	2.80003e-08	10.8851
UPF3A	-0.423787	4.04067	-6.20496	1.49509e-09	2.80359e-08	10.8828
SYNGR2	0.480051	7.45405	6.19961	1.54173e-09	2.88782e-08	10.8528
OAS3	0.845925	5.26445	6.19609	1.57329e-09	2.94364e-08	10.8331
RAB42	0.447813	2.83832	6.19556	1.57801e-09	2.9492e-08	10.8302
KRTDAP	-0.65749	1.49418	-6.19529	1.58046e-09	2.95048e-08	10.8286
RARRES1	1.16796	5.0249	6.19181	1.61234e-09	3.00665e-08	10.8092
SCO2	0.377021	4.47275	6.19055	1.62411e-09	3.02525e-08	10.8021
CTSB	0.485192	8.71779	6.18969	1.63213e-09	3.03681e-08	10.7973
NUPR1	0.659457	5.05644	6.18818	1.64635e-09	3.05987e-08	10.7888
KCNJ14	-0.392958	1.47329	-6.18746	1.65316e-09	3.06914e-08	10.7848
CFAP69	-0.367505	1.34775	-6.18702	1.65729e-09	3.07179e-08	10.7824
ETS1	0.509461	3.51175	6.18692	1.65825e-09	3.07179e-08	10.7818
SP100	0.406588	3.88755	6.18355	1.69061e-09	3.12828e-08	10.763
MATK	0.52802	1.37832	6.18199	1.70582e-09	3.15296e-08	10.7543
SELT	0.39908	6.24069	6.17898	1.73548e-09	3.20425e-08	10.7375
WDR92	-0.209665	1.11067	-6.17243	1.80184e-09	3.32311e-08	10.7009
BTN2A2	0.396256	2.43739	6.17143	1.81211e-09	3.33837e-08	10.6954
CCL3L3	0.730943	2.08952	6.16334	1.89801e-09	3.4928e-08	10.6502
ITGA5	0.673812	4.19651	6.16102	1.92336e-09	3.53558e-08	10.6373
FAP	0.888684	1.83288	6.15838	1.95251e-09	3.58524e-08	10.6227
GGT5	0.58053	2.7026	6.15656	1.97296e-09	3.61881e-08	10.6125
RSU1	0.365039	5.41825	6.14729	2.08024e-09	3.81143e-08	10.5609
RPL11	-0.409728	10.1117	-6.14358	2.12477e-09	3.88876e-08	10.5403
SELM	0.85815	5.33992	6.12738	2.33016e-09	4.26003e-08	10.4504
PIP4K2A	0.445598	3.89691	6.12336	2.38405e-09	4.3538e-08	10.4281
LGR5	-1.27683	3.43511	-6.12041	2.4245e-09	4.42287e-08	10.4117
MYO5A	0.414688	2.18895	6.11558	2.49189e-09	4.54087e-08	10.385
TRAF1	0.409909	2.12707	6.11034	2.56726e-09	4.67314e-08	10.356
EFR3B	-0.43913	1.00041	-6.10979	2.57531e-09	4.68272e-08	10.353
RAB7B	0.510762	2.24448	6.10168	2.69663e-09	4.89801e-08	10.3081
BIRC3	0.746908	2.77605	6.09785	2.75581e-09	5.00008e-08	10.287
MARCKS	0.543581	6.35388	6.09295	2.83354e-09	5.13557e-08	10.2599
BBS5	-0.366981	2.88661	-6.08178	3.01861e-09	5.46508e-08	10.1983
CETP	0.339342	0.942365	6.08157	3.02224e-09	5.46576e-08	10.1971
RAB9A	0.397947	5.10156	6.07988	3.05125e-09	5.51228e-08	10.1878
ZNF804A	0.167767	0.380406	6.07695	3.10218e-09	5.59827e-08	10.1717
SEMA4A	0.557128	3.58228	6.06962	3.23349e-09	5.82896e-08	10.1314
CCDC151	-0.671004	2.25459	-6.06677	3.28595e-09	5.91717e-08	10.1157
GPR155	0.416356	1.98001	6.05528	3.50611e-09	6.30686e-08	10.0526
AC109829.1	-0.298988	0.690081	-6.05351	3.54132e-09	6.36339e-08	10.0428
PNMT	-0.779162	1.60199	-6.04977	3.61688e-09	6.49221e-08	10.0223
TPPP3	-0.908112	4.39942	-6.03077	4.02512e-09	7.21726e-08	9.91818
SERPINB8	0.493028	2.83564	6.02972	4.0489e-09	7.25215e-08	9.91244
IFI44	0.775149	5.74928	6.02835	4.08025e-09	7.28918e-08	9.90494
GSDMC	0.67091	1.43731	6.02827	4.08223e-09	7.28918e-08	9.90446
VTCN1	1.24617	5.92164	6.02825	4.0826e-09	7.28918e-08	9.90437
SLC16A3	0.622831	4.15869	6.02719	4.10707e-09	7.31897e-08	9.89856
IFT81	-0.453721	2.68045	-6.02715	4.10801e-09	7.31897e-08	9.89834
RAP1A	0.275745	4.89186	6.02652	4.12256e-09	7.3371e-08	9.89489
CAMKV	-0.341399	0.292483	-6.02585	4.13814e-09	7.35704e-08	9.89122
SCML4	0.205274	0.246199	6.01697	4.34967e-09	7.72492e-08	9.8427
GUCY1A3	0.644348	1.99964	6.01449	4.41053e-09	7.82474e-08	9.82918
WDR60	-0.393452	3.53611	-6.00983	4.52744e-09	8.02366e-08	9.80372
MR1	0.480448	2.80126	6.00929	4.54117e-09	8.0395e-08	9.80077
TMEM132B	-0.530687	0.813484	-6.00645	4.61416e-09	8.16012e-08	9.78526
IRAK3	0.427809	1.26896	6.00617	4.62146e-09	8.16441e-08	9.78372
LILRB5	0.348999	0.786172	6.00513	4.64844e-09	8.20344e-08	9.77806
TNNI1	-0.575725	1.64054	-6.00332	4.69581e-09	8.27834e-08	9.76819
VWA3A	-0.810261	1.4166	-5.99727	4.85775e-09	8.54706e-08	9.7352
FXYD1	-0.737367	1.94144	-5.99724	4.85843e-09	8.54706e-08	9.73506
FBXO8	0.313581	3.67835	5.99357	4.95933e-09	8.71543e-08	9.71506
ZNF219	-0.644839	4.41628	-5.98835	5.10637e-09	8.96445e-08	9.68663
PNMA3	-0.802287	2.62053	-5.98782	5.12153e-09	8.98144e-08	9.68375
SAMHD1	0.601581	6.05191	5.98763	5.12675e-09	8.98144e-08	9.68275
TTC25	-0.558267	1.77014	-5.98619	5.16821e-09	9.04464e-08	9.67492
LCN2	1.19015	8.01908	5.97423	5.52541e-09	9.65969e-08	9.6099
KIAA0513	0.362762	1.26542	5.97398	5.53307e-09	9.66301e-08	9.60855
SAR1B	0.297611	3.35204	5.97205	5.59305e-09	9.75761e-08	9.59806
PIK3CD	0.543623	3.24917	5.97094	5.62801e-09	9.80841e-08	9.592
ARID5A	0.418002	4.13083	5.96451	5.83346e-09	1.01559e-07	9.55712
ACVR2B	-0.436814	2.29743	-5.95735	6.07082e-09	1.05582e-07	9.51832
IRF2BP1	-0.40823	6.07301	-5.95688	6.08676e-09	1.0575e-07	9.51577
HRH2	0.421568	1.14562	5.95573	6.1258e-09	1.06318e-07	9.50955
PDCD10	0.398219	5.60826	5.95295	6.22137e-09	1.07865e-07	9.49449
IKBKE	0.516266	4.04189	5.95087	6.2939e-09	1.0901e-07	9.48322
C17orf50	-0.294458	0.581015	-5.94892	6.36277e-09	1.10089e-07	9.47263
ZNF84	-0.446058	2.9369	-5.94664	6.44386e-09	1.11377e-07	9.46031
GJB2	1.11031	3.92405	5.94645	6.45068e-09	1.1138e-07	9.45928
NINJ1	0.413653	5.97513	5.94538	6.48921e-09	1.11931e-07	9.45349
TET1	-0.436928	1.37998	-5.94427	6.5295e-09	1.1251e-07	9.44747
TMEM178A	-0.822577	2.63595	-5.94398	6.53981e-09	1.12572e-07	9.44594
MMP25	0.310763	1.19685	5.93974	6.69568e-09	1.15137e-07	9.42303
PDZK1IP1	1.14373	6.17722	5.93933	6.71129e-09	1.15287e-07	9.42076
COLEC11	-1.11556	2.19769	-5.93807	6.75834e-09	1.15977e-07	9.41397
VNN1	0.685231	1.69045	5.9376	6.77606e-09	1.16162e-07	9.41142
GPX3	1.06636	7.70495	5.93493	6.8772e-09	1.17775e-07	9.39701
DACT2	-0.925128	2.42055	-5.92939	7.09208e-09	1.21332e-07	9.36709
CD83	0.435756	4.00969	5.92857	7.12425e-09	1.21758e-07	9.36269
PTGER4	0.51663	2.26957	5.92412	7.30255e-09	1.24678e-07	9.33865
C3	1.10938	8.52873	5.92117	7.42287e-09	1.26604e-07	9.32276
RPL6	-0.395036	9.05679	-5.91779	7.56327e-09	1.28867e-07	9.30454
CHMP5	0.382973	6.25553	5.91381	7.73202e-09	1.31609e-07	9.28308
THBS2	1.14061	4.62841	5.91289	7.77146e-09	1.32146e-07	9.27813
DEF6	0.415262	3.7813	5.90821	7.97566e-09	1.35481e-07	9.25291
CTSD	0.473407	9.16453	5.90724	8.01848e-09	1.36071e-07	9.24771
PRAM1	0.385443	1.42226	5.90536	8.10232e-09	1.37355e-07	9.23759
CD79B	0.511244	1.50663	5.90435	8.14752e-09	1.37982e-07	9.23218
HLA-G	0.635742	1.6387	5.89998	8.34688e-09	1.41215e-07	9.20868
EFCAB12	-0.507883	1.14177	-5.89603	8.53138e-09	1.44192e-07	9.18742
F13A1	0.857039	3.59012	5.89356	8.64826e-09	1.4602e-07	9.17419
TMEM165	0.41435	5.26201	5.88587	9.02371e-09	1.52206e-07	9.13288
MORN5	-0.895547	1.83267	-5.88426	9.10393e-09	1.53405e-07	9.12427
COQ2	0.343529	3.54159	5.88018	9.31142e-09	1.56744e-07	9.10237
TCF7L1	-0.838781	3.84578	-5.87943	9.34982e-09	1.57233e-07	9.09836
CCNB1IP1	-0.501777	5.39821	-5.87765	9.44226e-09	1.58628e-07	9.0888
CFAP43	-0.506616	1.45303	-5.87692	9.48028e-09	1.59108e-07	9.08489
ITM2A	0.61139	3.17845	5.87633	9.51108e-09	1.59465e-07	9.08174
MX1	0.911981	5.52479	5.87505	9.57817e-09	1.6043e-07	9.07491
RIPK2	0.450461	4.70289	5.87095	9.79739e-09	1.63938e-07	9.05291
TPSAB1	0.887414	1.66279	5.86957	9.87214e-09	1.65024e-07	9.04552
B4GALNT3	-0.7007	3.03231	-5.86551	1.00951e-08	1.68584e-07	9.02381
KIAA1549	-0.559469	2.28816	-5.86324	1.0222e-08	1.70533e-07	9.01167
XAF1	0.643064	2.72715	5.85834	1.05014e-08	1.75019e-07	8.98547
GYG1	0.411525	5.22992	5.85684	1.05883e-08	1.76293e-07	8.97745
GSDMA	0.369147	0.769423	5.8489	1.10605e-08	1.83972e-07	8.93505
TMSB4X	0.485375	10.733	5.84778	1.11288e-08	1.84926e-07	8.92906
AXL	0.569194	4.38022	5.84656	1.12032e-08	1.85977e-07	8.92259
C22orf23	-0.316151	1.09035	-5.84521	1.12868e-08	1.8718e-07	8.91537
KIAA0930	0.404132	3.77391	5.83693	1.18111e-08	1.95681e-07	8.87124
FGF19	-0.813312	0.78134	-5.83635	1.18493e-08	1.9612e-07	8.86811
NME9	-0.373145	0.859736	-5.8285	1.23701e-08	2.0454e-07	8.8263
FGF7	0.568693	1.06218	5.82747	1.24397e-08	2.05488e-07	8.82086
WBP1	-0.38217	4.74012	-5.82432	1.2656e-08	2.08855e-07	8.80411
MFNG	0.484915	2.6089	5.82161	1.28456e-08	2.11775e-07	8.78966
ZNF423	-0.796623	2.48295	-5.8213	1.28668e-08	2.11917e-07	8.78805
ENO4	-0.289598	0.797992	-5.81691	1.31799e-08	2.16861e-07	8.76469
GPR137B	0.542652	4.55421	5.81555	1.3278e-08	2.18262e-07	8.75749
IL24	0.342599	0.968718	5.81194	1.35431e-08	2.224e-07	8.73829
MSI1	-0.924567	4.26262	-5.80007	1.44496e-08	2.37056e-07	8.67534
ACP2	0.343045	5.47245	5.7996	1.44869e-08	2.37435e-07	8.67284
RILP	0.456252	3.73347	5.79485	1.48674e-08	2.43434e-07	8.64765
DMTN	-0.660345	4.52092	-5.79442	1.49021e-08	2.43763e-07	8.64539
PRKCB	0.477606	1.26837	5.79191	1.51069e-08	2.46874e-07	8.63213
ARNT2	-0.642574	3.51334	-5.7886	1.53819e-08	2.51122e-07	8.61461
DBI	0.382916	6.12626	5.78518	1.56713e-08	2.55599e-07	8.5965
DSE	0.424486	2.18609	5.78485	1.56995e-08	2.5581e-07	8.59476
NLRC3	0.317506	1.28136	5.78245	1.59061e-08	2.58925e-07	8.58206
CCDC146	-1.04259	4.22329	-5.77961	1.61542e-08	2.6271e-07	8.56702
LTBP4	-0.836231	5.3546	-5.77733	1.63555e-08	2.65725e-07	8.555
IL17RA	0.399627	3.44413	5.77583	1.64897e-08	2.67647e-07	8.54706
C20orf96	-0.518706	5.24263	-5.77297	1.67478e-08	2.71573e-07	8.53197
PNMAL1	-0.565687	4.52366	-5.77196	1.68397e-08	2.72749e-07	8.52666
CERS1	-0.376428	0.899636	-5.77179	1.68561e-08	2.72749e-07	8.52572
GYPC	0.556988	4.08234	5.77164	1.68691e-08	2.72749e-07	8.52497
TREM1	0.499877	1.61686	5.76209	1.77678e-08	2.87005e-07	8.47456
PSMA6	0.346459	3.26069	5.75894	1.80739e-08	2.91668e-07	8.45797
P2RX1	0.348441	0.626166	5.75761	1.82048e-08	2.93497e-07	8.45097
HLX	0.367546	1.96425	5.75617	1.83472e-08	2.9551e-07	8.4434
ING5	-0.386703	3.0114	-5.75569	1.83957e-08	2.96007e-07	8.44083
TRANK1	0.557529	2.76627	5.75481	1.84831e-08	2.97129e-07	8.43623
SUSD6	0.498622	4.98098	5.74903	1.90716e-08	3.06295e-07	8.4058
MAATS1	-0.529578	1.96957	-5.74869	1.9107e-08	3.06571e-07	8.404
NACA	-0.316373	7.19606	-5.7462	1.93664e-08	3.10339e-07	8.3909
KLHDC8A	-0.953855	3.21155	-5.74608	1.93789e-08	3.10339e-07	8.39028
LRG1	0.947987	3.57197	5.74347	1.96545e-08	3.14453e-07	8.37657
ACAP1	0.322151	1.92995	5.74073	1.99482e-08	3.18848e-07	8.36216
EDNRA	0.687815	2.67862	5.74042	1.99822e-08	3.19087e-07	8.36051
TAPBPL	0.55918	5.32959	5.73618	2.04462e-08	3.26186e-07	8.33822
RIN3	0.426537	3.38366	5.73145	2.09753e-08	3.3431e-07	8.31342
TMEM221	-0.76211	2.56684	-5.72975	2.11696e-08	3.37086e-07	8.30447
RNF166	0.327372	3.40547	5.72934	2.12163e-08	3.37511e-07	8.30233
NCOA7	0.519945	4.08135	5.72608	2.15926e-08	3.43171e-07	8.28526
PLA2G4C	0.335775	1.09858	5.72552	2.16581e-08	3.43886e-07	8.28232
CYSLTR2	0.22979	0.438048	5.72026	2.22828e-08	3.53471e-07	8.25472
KIAA1683	-0.744656	2.84696	-5.7134	2.31233e-08	3.66458e-07	8.21877
CFB	0.80128	5.22075	5.71064	2.34691e-08	3.71587e-07	8.20437
GRIN3A	0.103314	0.236813	5.71042	2.34973e-08	3.71683e-07	8.2032
S100A12	0.52138	1.12102	5.70989	2.35638e-08	3.72384e-07	8.20046
SNX9	0.394907	4.98463	5.70918	2.36542e-08	3.7346e-07	8.19674
PRKCH	0.396406	2.09627	5.70267	2.44994e-08	3.8644e-07	8.16267
SMO	-0.610993	4.93406	-5.70221	2.45601e-08	3.87034e-07	8.16026
MS4A4E	0.223599	0.433153	5.7002	2.48275e-08	3.90819e-07	8.14975
RAB39A	0.296663	0.672048	5.70005	2.48468e-08	3.90819e-07	8.149
APOL4	0.740843	3.06595	5.69923	2.49573e-08	3.9219e-07	8.14469
CYP11A1	-0.651394	1.70322	-5.69889	2.50022e-08	3.92527e-07	8.14295
RBM26	-0.334514	3.95025	-5.69705	2.52521e-08	3.96081e-07	8.13329
NRP1	0.527649	3.45078	5.69227	2.59098e-08	4.06016e-07	8.10834
FCGR3B	0.396979	0.583868	5.69031	2.61835e-08	4.09923e-07	8.09814
SNX11	0.348606	3.88057	5.68218	2.7353e-08	4.27834e-07	8.05574
TPSB2	0.747961	1.33201	5.68109	2.75125e-08	4.29928e-07	8.0501
SH3BP1	0.433305	3.6351	5.67973	2.77141e-08	4.32675e-07	8.04301
ELTD1	0.417251	2.68637	5.67874	2.78617e-08	4.34576e-07	8.03786
DNAH7	-0.249517	0.569286	-5.67813	2.79544e-08	4.35616e-07	8.03463
RP2	0.383836	3.70483	5.67659	2.81864e-08	4.38823e-07	8.02662
SIGLEC12	0.374796	0.530471	5.66917	2.93294e-08	4.56196e-07	7.98804
DCUN1D2	-0.41161	3.47718	-5.66409	3.01393e-08	4.6836e-07	7.96161
DNAH11	-0.272189	0.467701	-5.66378	3.01893e-08	4.68703e-07	7.96
CECR1	0.618889	5.13783	5.66212	3.04585e-08	4.72444e-07	7.95139
PTK2B	0.422769	3.20125	5.65785	3.11633e-08	4.82931e-07	7.9292
ATP6V1E1	0.32506	6.08772	5.65364	3.18727e-08	4.93468e-07	7.90736
ARID3C	-0.535002	0.9364	-5.65329	3.19319e-08	4.93929e-07	7.90556
CPED1	0.437254	1.4755	5.65236	3.20916e-08	4.95942e-07	7.90072
DPYSL5	-0.736972	0.642318	-5.64951	3.25839e-08	5.03087e-07	7.88595
SLC28A3	0.685812	2.45985	5.64929	3.26232e-08	5.03231e-07	7.88478
GJC2	-0.723471	2.44355	-5.64739	3.29567e-08	5.07909e-07	7.87492
SLC10A7	0.288345	2.17535	5.64721	3.2987e-08	5.07909e-07	7.87402
TOM1	0.380491	3.95411	5.63753	3.47375e-08	5.34372e-07	7.82387
ZNF483	-0.187317	0.471289	-5.63667	3.48981e-08	5.3606e-07	7.81939
DNASE1L3	0.135511	0.211376	5.6366	3.49111e-08	5.3606e-07	7.81903
PMAIP1	0.542452	3.47025	5.63571	3.50775e-08	5.38122e-07	7.81442
DMKN	-0.663135	5.20502	-5.63401	3.53964e-08	5.42519e-07	7.80564
GALK1	0.349719	4.11589	5.6327	3.5645e-08	5.4583e-07	7.79885
ARRB2	0.31797	4.90387	5.63238	3.57058e-08	5.46263e-07	7.7972
FAM49A	0.431504	2.60911	5.63183	3.58104e-08	5.47365e-07	7.79436
DDX25	-0.388972	0.620592	-5.63122	3.59273e-08	5.48651e-07	7.7912
PHF21B	-0.352636	0.332711	-5.62775	3.65967e-08	5.58365e-07	7.7733
NTAN1	0.347047	3.87336	5.62752	3.66427e-08	5.5856e-07	7.77208
FKBP5	0.64609	3.40396	5.62644	3.68528e-08	5.61253e-07	7.76653
SOAT1	0.402138	3.44941	5.62427	3.72825e-08	5.67282e-07	7.75529
ATP6V1B2	0.355455	4.40417	5.62311	3.75125e-08	5.70265e-07	7.74933
PACRG	-0.548084	1.60179	-5.62286	3.75636e-08	5.70525e-07	7.74801
POSTN	1.38562	3.84127	5.6178	3.85898e-08	5.85581e-07	7.72187
LUM	1.2317	6.51011	5.61521	3.91237e-08	5.93146e-07	7.70854
C6orf118	-0.602363	1.10334	-5.60555	4.11861e-08	6.2385e-07	7.65872
NCK1	0.348804	5.09938	5.60181	4.20114e-08	6.35778e-07	7.63948
ZNRF2	0.391319	4.1364	5.59689	4.31247e-08	6.52038e-07	7.61412
HMBOX1	-0.357561	2.55738	-5.5953	4.349e-08	6.56969e-07	7.60594
PDLIM3	0.736524	2.78452	5.59009	4.47072e-08	6.74749e-07	7.57918
HFE	0.352419	1.98065	5.58944	4.4862e-08	6.76478e-07	7.57583
ZNF512	-0.383634	4.85126	-5.58573	4.57529e-08	6.88717e-07	7.55676
HNRNPA1L2	-0.285784	1.86927	-5.58572	4.57558e-08	6.88717e-07	7.5567
PARP12	0.465227	4.81401	5.58306	4.64045e-08	6.97856e-07	7.54306
ME1	0.496903	2.59294	5.57673	4.79862e-08	7.20996e-07	7.51056
FGD3	0.350541	2.27188	5.57607	4.81544e-08	7.22876e-07	7.50717
AAAS	-0.284027	5.37643	-5.57476	4.84872e-08	7.27221e-07	7.5005
CCDC138	-0.355498	2.32032	-5.57168	4.92842e-08	7.38516e-07	7.48469
ZNF814	-0.356962	2.54428	-5.56911	4.99601e-08	7.47975e-07	7.47149
KAT2B	0.434814	3.18244	5.56691	5.05429e-08	7.55924e-07	7.46024
CFH	0.706187	3.57087	5.56677	5.05811e-08	7.55924e-07	7.45951
CFAP61	-0.331377	0.602497	-5.56555	5.09075e-08	7.60126e-07	7.45328
EPYC	1.30252	2.42463	5.56282	5.16466e-08	7.70475e-07	7.43931
CCDC148	-0.269259	1.10228	-5.55914	5.26591e-08	7.84882e-07	7.42049
NPAS3	-0.590948	2.99184	-5.55279	5.44549e-08	8.10766e-07	7.38799
STK36	-0.493226	4.16995	-5.55266	5.44923e-08	8.10766e-07	7.38732
MYL6B	-0.389901	5.51076	-5.55065	5.50722e-08	8.18669e-07	7.37706
C19orf44	-0.413654	2.99117	-5.54936	5.54474e-08	8.23517e-07	7.37048
EFCAB10	-0.47776	1.28572	-5.54679	5.62027e-08	8.33996e-07	7.35737
BAK1	0.40676	5.86764	5.54606	5.64213e-08	8.365e-07	7.35361
C1orf194	-1.01018	2.56202	-5.54157	5.77696e-08	8.55276e-07	7.33072
GAL3ST1	-0.629658	1.8405	-5.54151	5.77896e-08	8.55276e-07	7.33039
CTBS	0.325346	3.55628	5.54019	5.81907e-08	8.60454e-07	7.32368
NPHP1	-0.335346	1.78326	-5.53849	5.87138e-08	8.67425e-07	7.31501
DCN	0.922042	5.34372	5.53556	5.96263e-08	8.80131e-07	7.30007
DDO	0.436477	1.52393	5.5331	6.04029e-08	8.90052e-07	7.28753
EAF2	0.331341	2.14055	5.53303	6.04256e-08	8.90052e-07	7.28716
PLEKHF2	0.462016	4.73824	5.53293	6.04575e-08	8.90052e-07	7.28665
CKB	-0.739452	6.94254	-5.52766	6.21569e-08	9.14268e-07	7.25979
TFPI2	0.907894	3.98615	5.52484	6.30821e-08	9.27063e-07	7.24547
DHRS9	0.448935	0.771235	5.52218	6.39713e-08	9.39309e-07	7.23191
CAP1	0.352291	7.68674	5.5184	6.52536e-08	9.573e-07	7.21268
LEPROT	0.365921	5.66191	5.51806	6.53686e-08	9.58149e-07	7.21098
ARMC4	-0.451486	0.936944	-5.51572	6.61767e-08	9.69148e-07	7.19907
PLA2G15	0.37303	4.16629	5.51515	6.6375e-08	9.71204e-07	7.19617
TMEM71	0.368364	1.09249	5.51444	6.6623e-08	9.73984e-07	7.19256
AMPD3	0.39316	2.40099	5.51275	6.72163e-08	9.81802e-07	7.18397
CACNA2D2	-0.743203	2.23644	-5.51231	6.73696e-08	9.83186e-07	7.18177
UBA7	0.532736	5.2742	5.51155	6.76407e-08	9.86285e-07	7.17787
COMMD6	-0.39489	6.20722	-5.51055	6.79967e-08	9.90615e-07	7.17279
TSNAXIP1	-0.37472	1.14281	-5.50689	6.93124e-08	1.00891e-06	7.15422
SPEF2	-0.321531	1.53358	-5.50578	6.97161e-08	1.0139e-06	7.1486
FAM20A	0.822066	4.09965	5.50301	7.07361e-08	1.02785e-06	7.13453
SDK2	-0.7186	1.73181	-5.49899	7.22394e-08	1.04878e-06	7.11416
LRRC23	-0.498547	3.62033	-5.49848	7.24335e-08	1.05069e-06	7.11156
CSRNP3	-0.373487	1.3381	-5.49408	7.41194e-08	1.07422e-06	7.08927
TUBB2B	-1.18953	2.12054	-5.4924	7.47744e-08	1.08278e-06	7.08075
MYH6	-0.433495	0.40007	-5.49214	7.48732e-08	1.08327e-06	7.07947
TMEM81	-0.328927	2.40226	-5.49083	7.53899e-08	1.08981e-06	7.07281
VCAN	0.912808	3.52093	5.48881	7.61906e-08	1.10044e-06	7.06258
SMIM6	-0.680555	1.231	-5.48391	7.81621e-08	1.12794e-06	7.03783
NPM2	-0.394986	0.896133	-5.48127	7.92485e-08	1.14263e-06	7.02446
GJA5	0.762259	2.85019	5.47633	8.13171e-08	1.17145e-06	6.99951
CASC1	-0.653686	2.08106	-5.47238	8.30109e-08	1.19483e-06	6.97955
GRAP	0.173284	0.51179	5.46925	8.43766e-08	1.21345e-06	6.96374
RNFT2	-0.423285	2.33297	-5.46849	8.47112e-08	1.21722e-06	6.95991
TMEM70	0.301616	4.47237	5.468	8.4929e-08	1.2193e-06	6.95742
SV2C	-0.468655	0.710247	-5.46706	8.53417e-08	1.22418e-06	6.95273
ARL6IP5	0.389741	7.06754	5.46548	8.60498e-08	1.23328e-06	6.94473
LXN	0.484281	5.10795	5.46505	8.62428e-08	1.23499e-06	6.94256
TAS2R19	-0.196411	0.469126	-5.46163	8.77926e-08	1.25551e-06	6.92531
SPOCD1	0.289381	0.598487	5.46156	8.78252e-08	1.25551e-06	6.92495
INHBA	0.922173	2.53806	5.46024	8.84271e-08	1.26304e-06	6.91834
CCDC37	-0.615732	1.04942	-5.45747	8.97128e-08	1.28031e-06	6.90436
SOX6	-0.437518	1.31608	-5.45565	9.05668e-08	1.2914e-06	6.89519
GATA3	0.582139	1.85918	5.45185	9.23715e-08	1.31602e-06	6.87609
G0S2	0.58905	4.33754	5.44817	9.41574e-08	1.34033e-06	6.85755
MB21D1	0.536338	2.64544	5.44755	9.44591e-08	1.34348e-06	6.85445
NAMPT	0.369035	4.42149	5.44484	9.5797e-08	1.36136e-06	6.84083
SAMD9	0.603185	3.66645	5.44304	9.66954e-08	1.37296e-06	6.8318
UBE2D3	0.277029	5.8277	5.44225	9.70947e-08	1.37746e-06	6.82781
SNX6	0.326445	5.7396	5.44189	9.72744e-08	1.37885e-06	6.82602
CDKN2B	0.640183	3.41724	5.43809	9.92149e-08	1.40517e-06	6.8069
IRF7	0.628434	5.46321	5.43778	9.93717e-08	1.4062e-06	6.80537
IFIT1	0.82966	5.28987	5.43649	1.00039e-07	1.41445e-06	6.79889
C10orf107	-0.641332	1.30276	-5.43539	1.00612e-07	1.42135e-06	6.79336
TNFSF18	0.217577	0.417747	5.4337	1.015e-07	1.4327e-06	6.78485
EHD4	0.343722	4.57035	5.42824	1.0441e-07	1.47254e-06	6.75749
CCDC65	-0.532273	2.52691	-5.42805	1.04512e-07	1.47273e-06	6.75655
ANTXR2	0.492443	2.0839	5.42509	1.06126e-07	1.49422e-06	6.74171
PFKM	-0.431092	4.42736	-5.42244	1.07593e-07	1.51361e-06	6.72842
SQSTM1	0.418399	6.56881	5.42037	1.08752e-07	1.52863e-06	6.71806
EFEMP1	0.833557	3.84131	5.41759	1.10328e-07	1.54949e-06	6.70413
CPNE8	0.402835	1.538	5.41493	1.11856e-07	1.56964e-06	6.69082
ITGB6	0.743571	2.84186	5.4139	1.12452e-07	1.57668e-06	6.68568
COL10A1	1.11025	3.38173	5.41041	1.14501e-07	1.60406e-06	6.6682
ZNF428	-0.387632	5.43914	-5.41011	1.14678e-07	1.6052e-06	6.66671
GAL3ST3	-1.10583	2.69193	-5.40845	1.15666e-07	1.61768e-06	6.6584
ELMO1	0.471483	2.56407	5.40656	1.16799e-07	1.63217e-06	6.64897
STX12	0.320643	4.61832	5.4017	1.19768e-07	1.67227e-06	6.62468
CCDC8	-0.55122	5.53203	-5.40141	1.19944e-07	1.67333e-06	6.62326
HFM1	-0.269932	0.49559	-5.40076	1.20345e-07	1.67754e-06	6.62003
OAZ1	0.275696	8.12848	5.39897	1.21462e-07	1.6917e-06	6.61109
MAN2A1	0.35506	2.61876	5.39574	1.23507e-07	1.71876e-06	6.59493
GBP6	0.194541	0.365037	5.39557	1.23614e-07	1.71882e-06	6.5941
GLUL	0.334504	6.86716	5.39354	1.24912e-07	1.73164e-06	6.58399
RGS13	0.0517748	0.0715584	5.39352	1.24925e-07	1.73164e-06	6.58389
DLK1	-1.13026	1.44214	-5.39349	1.24945e-07	1.73164e-06	6.58374
IL13RA1	0.450237	6.09884	5.39348	1.24949e-07	1.73164e-06	6.5837
RASSF5	0.569518	2.86174	5.39292	1.25311e-07	1.73523e-06	6.5809
RABL2A	-0.382928	2.76482	-5.39256	1.25544e-07	1.73702e-06	6.5791
PTGER3	0.53378	1.24318	5.39119	1.26437e-07	1.74793e-06	6.57225
FBXL13	-0.299546	1.19844	-5.39007	1.27168e-07	1.75659e-06	6.56667
VAMP8	0.330746	8.31296	5.38903	1.27848e-07	1.76453e-06	6.56151
EFR3A	0.428738	5.23667	5.38872	1.28055e-07	1.76594e-06	6.55994
IFNGR2	0.281445	6.41318	5.38485	1.30629e-07	1.79996e-06	6.54069
MEST	-0.683131	6.39859	-5.38431	1.30992e-07	1.80348e-06	6.538
TAS2R14	-0.308762	1.35249	-5.3831	1.31813e-07	1.8133e-06	6.53196
MRVI1	0.564649	2.21948	5.38206	1.32518e-07	1.8215e-06	6.5268
CHRNA4	-0.280291	0.206483	-5.38026	1.33754e-07	1.83698e-06	6.51782
CALHM2	0.502981	5.11702	5.37901	1.34613e-07	1.84666e-06	6.51162
ANXA7	0.284986	6.33418	5.3789	1.34692e-07	1.84666e-06	6.51106
PTCH2	-0.48099	1.59799	-5.37876	1.34789e-07	1.84666e-06	6.51036
FXYD7	-0.892673	2.08876	-5.37661	1.36286e-07	1.86565e-06	6.49968
ACSL5	0.65132	4.37885	5.37521	1.37267e-07	1.87755e-06	6.49274
CRHBP	0.156641	0.309811	5.37478	1.37576e-07	1.88025e-06	6.49056
CD59	0.412011	6.93804	5.37314	1.38736e-07	1.89455e-06	6.48244
TMEM145	-0.415679	0.60802	-5.37156	1.3987e-07	1.9071e-06	6.47457
ADAMTS8	-0.383396	0.832098	-5.37154	1.39882e-07	1.9071e-06	6.47448
SFRP4	1.08741	4.39768	5.36836	1.42186e-07	1.93693e-06	6.45868
TIMP4	0.629058	1.44125	5.36779	1.42604e-07	1.94105e-06	6.45584
KIR3DX1	0.0541724	0.0634163	5.36714	1.4308e-07	1.94596e-06	6.45261
OLFML3	0.643931	5.55832	5.3648	1.44807e-07	1.96786e-06	6.44101
ZNF286B	-0.257381	0.807853	-5.36359	1.45714e-07	1.97857e-06	6.43497
C4orf33	0.326983	2.14826	5.36296	1.46185e-07	1.98337e-06	6.43185
C2orf70	-0.52494	1.13715	-5.36122	1.4749e-07	1.99946e-06	6.42325
TFEB	0.433207	3.11077	5.35995	1.48457e-07	2.01095e-06	6.41693
PPARG	0.438225	1.38959	5.35747	1.5036e-07	2.03413e-06	6.40461
GPR135	-0.35042	1.29853	-5.3574	1.50412e-07	2.03413e-06	6.40428
KAZALD1	-0.778326	2.85545	-5.35325	1.53645e-07	2.07618e-06	6.38371
CFAP46	-0.387271	0.835907	-5.35009	1.56151e-07	2.10835e-06	6.36806
MT1M	0.913664	2.82126	5.34944	1.56674e-07	2.11371e-06	6.36483
ELAVL3	-0.376004	0.344993	-5.34365	1.61384e-07	2.17551e-06	6.33618
ANKZF1	-0.357854	4.34255	-5.34337	1.61613e-07	2.17685e-06	6.33481
GPR115	0.313398	0.542288	5.34269	1.62174e-07	2.18266e-06	6.33146
C2orf82	-0.51151	2.2826	-5.34133	1.63307e-07	2.19614e-06	6.32473
ATL3	0.321321	5.26668	5.34051	1.63992e-07	2.20358e-06	6.32068
CTSA	0.368114	6.48561	5.33877	1.65463e-07	2.22157e-06	6.31205
EMC7	0.288234	6.1571	5.33617	1.67675e-07	2.24948e-06	6.2992
SEC14L5	-0.259872	0.403517	-5.3336	1.69888e-07	2.27734e-06	6.28653
LRRIQ1	-0.478666	1.29854	-5.33312	1.70306e-07	2.28112e-06	6.28415
ITGAV	0.497784	5.08904	5.3321	1.71197e-07	2.29122e-06	6.2791
ZCCHC3	-0.413803	5.16838	-5.33039	1.72703e-07	2.30954e-06	6.27064
SGK2	-0.432506	1.20176	-5.32919	1.73763e-07	2.32187e-06	6.26472
CALCOCO2	0.320402	4.10385	5.32734	1.75407e-07	2.34197e-06	6.25562
GSTO1	0.334525	6.40413	5.3245	1.77972e-07	2.37433e-06	6.24158
PLCE1	-0.450344	2.14465	-5.3203	1.81821e-07	2.42375e-06	6.22089
CD93	0.492684	3.40133	5.31798	1.83986e-07	2.45067e-06	6.20945
ITFG2	-0.372397	4.18246	-5.31753	1.84406e-07	2.45431e-06	6.20724
SPIB	0.280547	0.5555	5.31682	1.85073e-07	2.46124e-06	6.20375
SFT2D1	0.311078	5.14437	5.31209	1.89587e-07	2.51927e-06	6.18046
CXCL12	0.865108	4.13502	5.30658	1.9498e-07	2.58888e-06	6.15334
ALDH3A1	-0.592238	1.82444	-5.30625	1.95304e-07	2.59113e-06	6.15174
TAOK3	0.316847	2.96691	5.30348	1.98083e-07	2.62593e-06	6.13808
SLC50A1	0.341674	6.50299	5.30292	1.98645e-07	2.6313e-06	6.13534
ZMYND15	0.479816	2.65936	5.30276	1.98809e-07	2.63139e-06	6.13454
ATP10D	0.392443	1.96765	5.30201	1.99561e-07	2.63926e-06	6.1309
GLIPR2	0.550612	4.92902	5.30073	2.00871e-07	2.6545e-06	6.12457
BID	0.387762	4.52599	5.30013	2.01481e-07	2.66047e-06	6.12164
FAM181A	-0.667231	3.41513	-5.29969	2.01936e-07	2.66438e-06	6.11946
CLASRP	-0.330269	4.56565	-5.29918	2.02457e-07	2.66915e-06	6.11697
ZNF692	-0.390438	4.52707	-5.29776	2.03919e-07	2.68633e-06	6.11001
GPR150	0.155661	0.338603	5.29734	2.0436e-07	2.69003e-06	6.10792
LRP6	-0.456886	3.73156	-5.2965	2.05232e-07	2.69938e-06	6.10381
MAGI1	-0.447087	3.22741	-5.29188	2.10104e-07	2.76129e-06	6.08113
DIS3L2	-0.281221	2.84064	-5.29106	2.10983e-07	2.77068e-06	6.0771
ETFDH	0.282003	2.86693	5.29071	2.11351e-07	2.77334e-06	6.07541
TIGD1	-0.423758	3.36514	-5.29053	2.11549e-07	2.77377e-06	6.07451
AGR3	-0.96689	2.64881	-5.28823	2.14031e-07	2.80412e-06	6.06324
CXCL17	1.34772	5.47807	5.28758	2.14743e-07	2.81126e-06	6.06003
CCDC71L	0.333779	4.35358	5.28616	2.16295e-07	2.82936e-06	6.05307
WISP1	0.673282	2.44627	5.28579	2.16698e-07	2.83244e-06	6.05127
SHISA5	0.333175	7.1496	5.2851	2.17451e-07	2.84006e-06	6.04792
WDFY2	-0.335532	2.00412	-5.28064	2.22433e-07	2.90287e-06	6.02602
LGI3	-0.13546	0.180162	-5.28039	2.22711e-07	2.90425e-06	6.02482
LRGUK	-0.335891	1.15459	-5.27952	2.23691e-07	2.91476e-06	6.02058
DUSP15	-0.5609	1.94375	-5.27935	2.23885e-07	2.91501e-06	6.01974
STK33	-0.404036	1.77195	-5.2748	2.29109e-07	2.98073e-06	5.99745
PQLC3	0.370211	5.68752	5.27418	2.29826e-07	2.98774e-06	5.99443
GLI1	-0.414675	0.741383	-5.2729	2.31318e-07	3.00481e-06	5.98817
POU2F2	0.348673	1.91693	5.26986	2.34909e-07	3.04909e-06	5.97329
SLC43A3	0.49937	4.58893	5.26699	2.38337e-07	3.09119e-06	5.95929
PIK3IP1	0.481953	4.51588	5.26511	2.4062e-07	3.1184e-06	5.95008
2019-03-03	0.296958	1.28236	5.26128	2.45325e-07	3.17692e-06	5.93137
SOX3	-0.58481	0.548159	-5.2611	2.45544e-07	3.17731e-06	5.93051
MGAT4A	0.420748	3.15388	5.25998	2.46933e-07	3.19282e-06	5.92506
CTHRC1	0.847943	5.93307	5.25945	2.47599e-07	3.19896e-06	5.92246
ECM1	0.733053	3.98762	5.25894	2.48244e-07	3.20484e-06	5.91994
DDX58	0.564359	4.6621	5.25607	2.51862e-07	3.24904e-06	5.90597
NCEH1	0.521466	4.11037	5.2555	2.52596e-07	3.256e-06	5.90316
NFKBIA	0.414933	7.34073	5.25387	2.54679e-07	3.28034e-06	5.89522
NOVA1	-0.463753	1.17719	-5.25326	2.55461e-07	3.28788e-06	5.89226
PTPRE	0.336891	2.03376	5.25256	2.56364e-07	3.29698e-06	5.88885
STAT5A	0.451325	3.73029	5.25207	2.57002e-07	3.30265e-06	5.88645
C5orf56	0.30813	1.8027	5.2507	2.58779e-07	3.32295e-06	5.87979
SSC4D	-0.546931	3.01752	-5.24833	2.619e-07	3.36045e-06	5.86821
ZBBX	-0.513489	0.923757	-5.24734	2.63203e-07	3.37459e-06	5.86342
HMGA2	-0.89604	2.35217	-5.24691	2.63783e-07	3.37944e-06	5.86129
EEF1G	-0.328219	1.94866	-5.24434	2.67209e-07	3.42073e-06	5.84882
FGFR3	-0.840303	2.72992	-5.24336	2.68542e-07	3.43517e-06	5.84402
TACC1	0.503839	3.35166	5.23939	2.73969e-07	3.50192e-06	5.82469
TMEM59L	-0.615881	1.21696	-5.2372	2.77006e-07	3.53804e-06	5.81405
FMO2	0.655496	1.25563	5.23689	2.77435e-07	3.54083e-06	5.81255
SAA1	1.11973	4.14307	5.23589	2.78834e-07	3.55598e-06	5.80769
BTC	0.647803	3.29893	5.23305	2.82853e-07	3.6045e-06	5.79387
EMX2	-0.816252	6.66764	-5.22918	2.88404e-07	3.67245e-06	5.7751
FBRSL1	-0.408854	5.32165	-5.22508	2.94406e-07	3.74336e-06	5.75521
ANKLE1	-0.634664	1.96706	-5.22508	2.94419e-07	3.74336e-06	5.75516
CHRNA6	0.249903	0.485193	5.22483	2.94781e-07	3.74513e-06	5.75398
ACKR1	0.641675	2.11088	5.22434	2.95515e-07	3.75161e-06	5.75158
ASXL3	-0.274956	0.380704	-5.21998	3.0206e-07	3.8318e-06	5.73042
COL9A3	-0.855641	1.76482	-5.21799	3.05082e-07	3.86676e-06	5.72081
ZNF20	-0.235373	0.875489	-5.21787	3.05276e-07	3.86676e-06	5.72019
ITGAD	0.180646	0.39678	5.21686	3.06825e-07	3.88344e-06	5.71531
PRCD	-0.157699	0.464483	-5.21098	3.16001e-07	3.99657e-06	5.68685
DYNC2H1	-0.319884	1.51123	-5.20875	3.19557e-07	4.0385e-06	5.67605
ITGA11	0.803829	2.64025	5.20702	3.22334e-07	4.07053e-06	5.66769
NANOS3	-0.429568	2.0009	-5.20382	3.27555e-07	4.13335e-06	5.65218
WASH1	-0.355731	3.84391	-5.20333	3.28361e-07	4.14041e-06	5.64981
CNRIP1	0.443324	2.2637	5.20176	3.30955e-07	4.16998e-06	5.64221
ATP6V0B	0.362537	6.98024	5.1996	3.34548e-07	4.2121e-06	5.63178
KCNE4	0.586747	1.69767	5.19752	3.38039e-07	4.25286e-06	5.62176
NOXA1	-0.523717	5.33247	-5.19616	3.40363e-07	4.27889e-06	5.61515
COLEC12	0.629011	2.56517	5.19392	3.44193e-07	4.32379e-06	5.60435
ZSCAN18	-0.382509	3.63282	-5.19133	3.48669e-07	4.37675e-06	5.59187
TRPS1	0.621308	3.67665	5.18952	3.51844e-07	4.4133e-06	5.58312
ECSCR	0.329532	2.04634	5.18398	3.61714e-07	4.53372e-06	5.55642
ASCL5	-0.301926	0.78786	-5.18369	3.62252e-07	4.53707e-06	5.55498
IRF5	0.422447	3.44494	5.18029	3.6845e-07	4.61126e-06	5.53861
PTOV1	-0.294162	6.48058	-5.17907	3.70693e-07	4.63587e-06	5.53275
MORN4	-0.389898	3.45589	-5.17864	3.71496e-07	4.64246e-06	5.53066
ZNF267	0.262943	2.48427	5.17686	3.74799e-07	4.68025e-06	5.52212
GBA	0.383384	5.37899	5.17388	3.80406e-07	4.74673e-06	5.50778
THBD	0.547842	2.75392	5.17259	3.82864e-07	4.77385e-06	5.50157
ANPEP	0.892854	4.14478	5.17218	3.83645e-07	4.78004e-06	5.4996
SFSWAP	-0.310284	3.6372	-5.17084	3.86232e-07	4.8087e-06	5.49312
LEFTY2	-0.597468	1.05011	-5.16928	3.89237e-07	4.84252e-06	5.48564
IFIT5	0.42902	4.21327	5.16828	3.91181e-07	4.8631e-06	5.48083
ELOVL1	0.32183	6.77895	5.16697	3.93737e-07	4.89126e-06	5.47454
ATP6V0D1	0.33601	4.71714	5.16662	3.9442e-07	4.89611e-06	5.47287
EPAS1	0.481884	4.79035	5.16532	3.96995e-07	4.92445e-06	5.46659
CORO1C	0.361587	4.75667	5.16306	4.01479e-07	4.97639e-06	5.45575
SLC39A5	-0.362964	0.519506	-5.16285	4.01902e-07	4.97795e-06	5.45473
UBE2A	0.299328	4.9019	5.16136	4.04891e-07	5.01127e-06	5.44758
ANKRD23	-0.181726	0.71998	-5.15707	4.13626e-07	5.11562e-06	5.42699
RPL37A	-0.43217	9.22725	-5.15541	4.17062e-07	5.15431e-06	5.419
NAA16	-0.319834	2.5538	-5.15454	4.18867e-07	5.17281e-06	5.41484
ARSA	0.439772	4.6286	5.15283	4.22444e-07	5.21314e-06	5.40663
POU2F1	-0.317166	3.03552	-5.1521	4.23983e-07	5.22829e-06	5.40312
MST1	-0.513208	2.76816	-5.15174	4.24737e-07	5.23374e-06	5.40141
NTM	0.661781	1.35652	5.15061	4.27133e-07	5.2594e-06	5.39598
ATP1A2	-0.566515	0.878018	-5.15013	4.28135e-07	5.26562e-06	5.39372
OIT3	-0.217482	0.36436	-5.15004	4.28335e-07	5.26562e-06	5.39327
IFITM1	0.695257	9.68392	5.14993	4.28579e-07	5.26562e-06	5.39272
TMEM151B	-0.232911	0.246893	-5.1496	4.29272e-07	5.27028e-06	5.39116
FSD1L	-0.269033	1.38275	-5.14161	4.46635e-07	5.47944e-06	5.35291
GPX1	0.308923	9.76278	5.14008	4.50046e-07	5.51725e-06	5.34557
TEX11	0.18543	0.379904	5.13976	4.50767e-07	5.52206e-06	5.34402
STAR	-0.756759	1.31808	-5.13647	4.58176e-07	5.60872e-06	5.3283
CFAP44	-0.354779	1.29129	-5.13546	4.60458e-07	5.63256e-06	5.3235
RNF157	-0.52456	1.73337	-5.13457	4.62516e-07	5.65361e-06	5.3192
STAMBPL1	0.254794	1.19498	5.13261	4.67022e-07	5.70144e-06	5.30985
FGF9	-0.638205	1.51202	-5.13257	4.67108e-07	5.70144e-06	5.30967
PLN	0.56829	1.2445	5.1321	4.68191e-07	5.7105e-06	5.30744
SEMA4G	-0.468726	2.51785	-5.13176	4.68981e-07	5.71598e-06	5.30581
RNF32	-0.296821	1.67208	-5.13031	4.72378e-07	5.75175e-06	5.29885
LRRC61	-0.427815	5.73094	-5.13021	4.72601e-07	5.75175e-06	5.29839
RSPH10B	-0.11809	0.175587	-5.12966	4.73902e-07	5.7634e-06	5.29574
TSPEAR	-0.364337	0.54033	-5.12936	4.74605e-07	5.76777e-06	5.29431
RPL22	-0.33141	7.13199	-5.12662	4.81087e-07	5.84231e-06	5.28123
KCNH8	-0.333946	0.669818	-5.12567	4.83348e-07	5.86554e-06	5.2767
AKNA	0.430571	3.19687	5.12488	4.85234e-07	5.88416e-06	5.27295
XRCC1	-0.345239	5.234	-5.12423	4.86806e-07	5.89896e-06	5.26983
IHH	-0.549942	0.497448	-5.12071	4.95345e-07	5.9981e-06	5.25305
GSDMD	0.407808	4.99154	5.12041	4.96091e-07	6.0028e-06	5.2516
SGK1	0.504234	4.0724	5.11823	5.01473e-07	6.06356e-06	5.24119
PAPSS2	0.495652	2.97914	5.11745	5.0341e-07	6.0826e-06	5.23748
ZNF605	-0.370126	2.4326	-5.11483	5.09957e-07	6.15727e-06	5.22501
SLFN11	0.451236	3.43527	5.1139	5.12311e-07	6.18125e-06	5.22057
ZNF285	-0.328241	1.5755	-5.1136	5.13059e-07	6.18583e-06	5.21916
SH3BGRL3	0.306525	8.45793	5.10692	5.30271e-07	6.38876e-06	5.18734
RFTN1	0.452465	3.98214	5.1055	5.33991e-07	6.42896e-06	5.1806
KRT39	0.15228	0.213848	5.10347	5.39378e-07	6.48916e-06	5.17092
ZBED3	-0.434827	3.76287	-5.10291	5.40853e-07	6.50224e-06	5.16829
IQUB	-0.257794	0.45662	-5.09989	5.48975e-07	6.59516e-06	5.15392
DTX3	-0.42302	4.80512	-5.09903	5.51299e-07	6.61835e-06	5.14984
DYNLT3	0.331226	4.32321	5.09852	5.52704e-07	6.63047e-06	5.14739
ISG15	0.831919	8.28082	5.09519	5.61831e-07	6.73515e-06	5.1316
CA14	-0.39848	1.37674	-5.09504	5.62239e-07	6.73523e-06	5.1309
CCL26	0.312438	0.76653	5.09324	5.67265e-07	6.79059e-06	5.12231
HP	1.17557	2.96262	5.09212	5.70381e-07	6.82302e-06	5.11703
VWA5A	0.528912	3.36879	5.09159	5.7189e-07	6.8362e-06	5.11449
SOX11	-0.85825	1.31233	-5.08917	5.7872e-07	6.91293e-06	5.10304
ANKRD44	0.281994	1.38188	5.08831	5.81193e-07	6.93753e-06	5.09893
SPEF1	-0.66189	2.57441	-5.08687	5.85312e-07	6.98173e-06	5.09212
CXCL16	0.506114	7.13337	5.08422	5.92993e-07	7.06833e-06	5.07955
MLX	0.309336	4.72256	5.08096	6.02573e-07	7.17742e-06	5.0641
LAMA1	-0.571499	1.38472	-5.0797	6.06327e-07	7.21701e-06	5.05811
PIANP	-0.802903	1.91437	-5.07948	6.06972e-07	7.21957e-06	5.05709
TMEM246	-0.658059	3.0663	-5.07848	6.09971e-07	7.25011e-06	5.05234
FAM177B	0.229575	0.680946	5.07396	6.2365e-07	7.40744e-06	5.03096
ZNF574	-0.343231	4.67483	-5.07063	6.33929e-07	7.52421e-06	5.0152
CCDC27	-0.235684	0.624038	-5.07048	6.34384e-07	7.52429e-06	5.01451
GPR31	0.199915	0.380494	5.06927	6.38176e-07	7.56391e-06	5.00876
FMO1	0.59923	1.72069	5.06734	6.44238e-07	7.63038e-06	4.99965
FAM227A	-0.318212	1.25834	-5.06527	6.50811e-07	7.70279e-06	4.98987
S100A6	0.685601	10.2437	5.06298	6.58155e-07	7.78422e-06	4.97905
PTMS	-0.384347	10.1277	-5.06271	6.59014e-07	7.78889e-06	4.9778
KCP	-0.547097	1.47171	-5.06178	6.62037e-07	7.81912e-06	4.97338
LGALS2	0.502589	2.09096	5.05996	6.67958e-07	7.8835e-06	4.9648
CD302	0.368584	1.72813	5.0588	6.71755e-07	7.92274e-06	4.95934
DYX1C1	-0.301949	1.51994	-5.05598	6.81115e-07	8.02749e-06	4.946
FAM124B	0.141612	0.454411	5.05566	6.82182e-07	8.03443e-06	4.9445
NECAP2	0.280391	4.88089	5.0547	6.85386e-07	8.06651e-06	4.93998
ARSB	0.348953	2.24769	5.05323	6.90329e-07	8.11898e-06	4.93306
DNAI1	-0.571568	1.18411	-5.04951	7.02992e-07	8.26213e-06	4.91554
RPL23	-0.382366	8.12645	-5.04844	7.0669e-07	8.29848e-06	4.91048
SNX2	0.287905	5.32538	5.04833	7.07074e-07	8.29848e-06	4.90996
ADARB2	-0.318264	0.49006	-5.04816	7.07658e-07	8.29952e-06	4.90916
THEMIS2	0.618526	4.82465	5.04725	7.10815e-07	8.33073e-06	4.90487
CXCR2	0.273057	0.509475	5.04645	7.13601e-07	8.35755e-06	4.9011
HGFAC	-0.483194	1.35001	-5.04489	7.19054e-07	8.41554e-06	4.89377
FCER1A	0.55463	1.23961	5.04287	7.26182e-07	8.49304e-06	4.88426
STX1A	-0.363661	3.00311	-5.04158	7.30784e-07	8.54092e-06	4.87818
ATP10A	0.532378	2.04596	5.04141	7.31405e-07	8.54222e-06	4.87736
FRRS1L	-0.427626	0.902427	-5.03955	7.38061e-07	8.61397e-06	4.86863
OBSL1	-0.475953	5.42094	-5.03881	7.40751e-07	8.63828e-06	4.86512
ZC3H13	-0.354685	4.29336	-5.03869	7.41174e-07	8.63828e-06	4.86457
JPH4	-0.500242	1.11397	-5.03616	7.50376e-07	8.73946e-06	4.85269
RPS23	-0.387042	8.22941	-5.03539	7.53191e-07	8.76616e-06	4.84908
BRSK2	-0.416707	0.712057	-5.03508	7.54353e-07	8.7736e-06	4.84759
IQGAP1	0.384539	6.08495	5.03475	7.55572e-07	8.78169e-06	4.84604
KIAA0895	-0.356239	2.25643	-5.03384	7.58905e-07	8.81433e-06	4.8418
MTX3	-0.315783	2.64023	-5.03321	7.61245e-07	8.83539e-06	4.83883
TSPO	0.401175	7.61102	5.03203	7.65628e-07	8.88012e-06	4.8333
CYP4F22	0.235836	0.264158	5.03111	7.69089e-07	8.91411e-06	4.82895
TWF2	0.301059	6.10036	5.02949	7.752e-07	8.97873e-06	4.82133
NT5E	0.745009	3.38419	5.02856	7.78714e-07	9.01321e-06	4.81697
TICAM1	0.419617	4.70318	5.02589	7.88888e-07	9.11974e-06	4.80447
KLF12	-0.387078	2.37135	-5.02586	7.89004e-07	9.11974e-06	4.80433
WDR54	-0.444208	4.71697	-5.02547	7.90533e-07	9.13111e-06	4.80246
ZBTB8B	-0.209789	0.436232	-5.02412	7.9574e-07	9.18494e-06	4.79614
MOCOS	0.423065	1.97689	5.0211	8.07522e-07	9.31453e-06	4.78198
TMEM144	0.288406	1.82415	5.01715	8.23204e-07	9.4889e-06	4.76345
RPL5	-0.347442	10.2968	-5.01592	8.28116e-07	9.53897e-06	4.75772
GPR132	0.482665	2.12455	5.01015	8.5169e-07	9.80378e-06	4.73069
C5orf46	0.602332	1.1657	5.00921	8.55567e-07	9.84166e-06	4.72631
PIK3R2	-0.171	0.805536	-5.0089	8.56894e-07	9.84598e-06	4.72482
C2orf15	-0.330341	3.28906	-5.00884	8.57116e-07	9.84598e-06	4.72457
WDR44	0.349111	3.06608	5.00434	8.76058e-07	1.00567e-05	4.70352
IL22RA2	0.214827	0.286149	5.00388	8.78008e-07	1.00674e-05	4.70137
ENKUR	-0.59202	1.47776	-5.00384	8.78192e-07	1.00674e-05	4.70117
FANK1	-0.40175	2.09936	-5.00359	8.79274e-07	1.00729e-05	4.69999
CD36	0.517678	1.47505	5.00266	8.83246e-07	1.01115e-05	4.69565
ATG4A	0.309631	3.12997	5.00052	8.92458e-07	1.021e-05	4.68565
MURC	-0.320959	1.04172	-5.0001	8.9427e-07	1.02238e-05	4.6837
ACSM5	0.179599	0.390299	4.99888	8.99582e-07	1.02775e-05	4.678
CD1A	0.586455	0.87836	4.99756	9.05366e-07	1.03366e-05	4.67183
FNIP2	0.311771	1.94112	4.99556	9.14177e-07	1.04301e-05	4.6625
RHBDF2	0.368461	4.69111	4.99486	9.17304e-07	1.04586e-05	4.65921
KLHL5	0.378395	3.56669	4.9913	9.3323e-07	1.0633e-05	4.64264
TMEM72	-0.387414	0.435787	-4.98974	9.40333e-07	1.07067e-05	4.63534
ERAP1	0.408353	4.10246	4.98938	9.41984e-07	1.07182e-05	4.63365
TSGA10	-0.285299	1.91855	-4.98797	9.4841e-07	1.0784e-05	4.6271
ASPRV1	-0.332922	1.28392	-4.98767	9.49796e-07	1.07924e-05	4.62569
LAMA4	0.506459	2.99777	4.98487	9.62739e-07	1.09321e-05	4.61266
USP21	-0.292696	5.45169	-4.98444	9.64761e-07	1.09465e-05	4.61064
IGDCC3	-0.579656	0.611695	-4.98432	9.65313e-07	1.09465e-05	4.61009
GNAI2	0.277262	7.32848	4.98169	9.77706e-07	1.10764e-05	4.59781
POU2AF1	0.471495	1.171	4.98161	9.78085e-07	1.10764e-05	4.59744
RAB5C	0.307335	6.61296	4.98133	9.79403e-07	1.10773e-05	4.59614
KCNG1	-0.723345	2.26684	-4.98131	9.79485e-07	1.10773e-05	4.59606
FAR2	0.459614	1.94204	4.98019	9.8479e-07	1.11229e-05	4.59086
PTCHD2	-0.438689	0.614889	-4.98018	9.84846e-07	1.11229e-05	4.5908
B4GALT1	0.477938	6.79892	4.97928	9.89145e-07	1.1164e-05	4.58661
PRR33	0.181305	0.405503	4.97893	9.90815e-07	1.11753e-05	4.58499
SELE	0.218932	0.394767	4.9786	9.92396e-07	1.11856e-05	4.58345
MGAT5B	-0.619207	1.04748	-4.97837	9.93495e-07	1.11905e-05	4.58239
ZNF395	-0.36382	4.51276	-4.97653	1.00238e-06	1.1283e-05	4.57381
RSPH4A	-0.585361	1.48377	-4.97573	1.00625e-06	1.13126e-05	4.5701
BCL11B	0.287354	0.646671	4.97571	1.00636e-06	1.13126e-05	4.57
LGALS12	0.251741	0.452195	4.96994	1.03483e-06	1.16248e-05	4.54315
RAP2C	0.299225	4.12858	4.96957	1.03665e-06	1.16375e-05	4.54145
SIPA1	0.335895	5.1234	4.96897	1.03965e-06	1.16634e-05	4.53867
DMPK	-0.424623	3.81824	-4.96865	1.04129e-06	1.1674e-05	4.53715
CASQ1	-0.42718	1.0558	-4.96689	1.05015e-06	1.17655e-05	4.529
TTYH1	-0.922305	2.19893	-4.96593	1.05501e-06	1.1812e-05	4.52455
TMC6	0.413238	4.20147	4.96538	1.05782e-06	1.18356e-05	4.522
CYP20A1	-0.225414	3.31733	-4.96388	1.06549e-06	1.19128e-05	4.51504
TEKT2	-0.681893	3.11584	-4.96376	1.06614e-06	1.19128e-05	4.51445
CASP7	0.354915	4.19108	4.96237	1.0733e-06	1.19848e-05	4.50801
COPZ2	0.580897	3.3541	4.95668	1.10312e-06	1.23096e-05	4.48163
ALPP	-1.03873	2.27214	-4.95616	1.1059e-06	1.23325e-05	4.47921
FAM198B	0.510411	3.05238	4.956	1.10678e-06	1.2334e-05	4.47845
PDE1A	0.558856	1.79653	4.9557	1.10836e-06	1.23434e-05	4.47707
CCR8	0.375855	0.658172	4.95479	1.1132e-06	1.23891e-05	4.47288
ENSG00000187695	-0.238719	0.768463	-4.95332	1.12112e-06	1.2469e-05	4.46606
NT5DC2	-0.398667	6.28476	-4.9524	1.12612e-06	1.25163e-05	4.46178
DENND3	0.364997	2.12761	4.95076	1.13503e-06	1.2607e-05	4.45419
B9D1	-0.320049	3.50434	-4.94688	1.1564e-06	1.28358e-05	4.43624
NAIP	0.10772	0.32198	4.94641	1.15906e-06	1.28569e-05	4.43403
ICAM2	0.376034	1.97158	4.94591	1.16182e-06	1.28791e-05	4.43173
SOX12	-0.420162	6.52631	-4.94505	1.16666e-06	1.29241e-05	4.42774
SEMA5B	-0.768773	2.68007	-4.94481	1.16801e-06	1.29305e-05	4.42663
HNRNPA1	-0.281109	8.30628	-4.94284	1.17909e-06	1.30367e-05	4.41754
COL4A6	-0.370991	0.8477	-4.94283	1.17915e-06	1.30367e-05	4.41749
STEAP1	0.5704	4.20397	4.94175	1.1853e-06	1.3096e-05	4.41249
USP2	-0.417513	2.055	-4.94145	1.18699e-06	1.31061e-05	4.41111
RGS2	0.634416	3.9269	4.94124	1.18818e-06	1.31106e-05	4.41015
LPPR4	0.456661	1.23996	4.94104	1.18935e-06	1.31148e-05	4.40921
RSPH14	-0.318379	0.882883	-4.94024	1.19394e-06	1.31569e-05	4.40549
LRRC14B	-0.359443	0.868851	-4.94001	1.19526e-06	1.31628e-05	4.40443
LRRC75A	-0.355756	1.86808	-4.93968	1.19712e-06	1.31746e-05	4.40294
GJA1	0.729161	5.69533	4.93926	1.19956e-06	1.31928e-05	4.40098
RHOA	0.242358	9.13466	4.93785	1.20769e-06	1.32735e-05	4.39448
CXorf65	0.209022	0.528228	4.93744	1.21009e-06	1.32912e-05	4.39257
ACOT4	0.431909	2.70005	4.93723	1.21132e-06	1.3296e-05	4.39159
CCR3	0.161844	0.264338	4.93624	1.21711e-06	1.33508e-05	4.387
DMWD	-0.331216	4.71578	-4.93452	1.22718e-06	1.34525e-05	4.37907
DUSP22	0.320256	3.89507	4.93399	1.23028e-06	1.34777e-05	4.37664
ANKRD45	-0.522338	2.17468	-4.92656	1.27493e-06	1.39577e-05	4.34235
TCEA2	-0.302355	5.51992	-4.92566	1.28044e-06	1.40052e-05	4.3382
GINM1	0.290163	5.67527	4.92558	1.28094e-06	1.40052e-05	4.33782
BMP2K	0.306749	1.97851	4.92371	1.2925e-06	1.41224e-05	4.32918
RSPH1	-0.590626	2.79109	-4.9221	1.30247e-06	1.42221e-05	4.32179
MOXD1	0.649959	1.94144	4.92191	1.30368e-06	1.4226e-05	4.3209
IFT22	-0.287303	5.14608	-4.92076	1.31085e-06	1.4295e-05	4.31562
CHST10	-0.389476	3.58231	-4.91967	1.31773e-06	1.43607e-05	4.31058
LOX	0.767277	3.80705	4.91883	1.32303e-06	1.44091e-05	4.30672
ALPK1	0.305782	2.2215	4.91822	1.3269e-06	1.44419e-05	4.30391
SOSTDC1	-0.929319	2.5234	-4.91528	1.34571e-06	1.46371e-05	4.29038
C2orf73	-0.314363	0.612208	-4.91496	1.34777e-06	1.465e-05	4.2889
AHSG	-0.15828	0.194851	-4.91244	1.36409e-06	1.48178e-05	4.27732
SPATA17	-0.403371	1.53556	-4.90615	1.40574e-06	1.52604e-05	4.2484
DYNC2LI1	-0.284786	3.45094	-4.90492	1.41405e-06	1.53407e-05	4.24273
SGMS2	0.408678	3.34171	4.90438	1.41771e-06	1.53704e-05	4.24024
COL5A2	0.866913	4.71502	4.90327	1.4252e-06	1.54417e-05	4.23517
PRKAA2	-0.401953	1.89901	-4.90295	1.42742e-06	1.54557e-05	4.23368
CHD7	-0.437711	3.35537	-4.90259	1.42988e-06	1.5469e-05	4.23202
B3GNT3	0.807794	4.53953	4.90238	1.43131e-06	1.5469e-05	4.23106
SLC25A27	-0.482449	2.42548	-4.90236	1.43141e-06	1.5469e-05	4.23099
MEX3A	-0.627179	4.9201	-4.90176	1.43554e-06	1.55036e-05	4.22822
PRDM11	-0.378133	2.25514	-4.90028	1.44571e-06	1.56035e-05	4.22143
HERC3	0.300787	2.13489	4.90003	1.44743e-06	1.5612e-05	4.22029
FAM169A	-0.290818	0.762322	-4.89971	1.44962e-06	1.56255e-05	4.21883
PAFAH1B3	-0.397385	6.55297	-4.89795	1.46186e-06	1.57473e-05	4.21075
EFCAB2	-0.400755	2.39512	-4.89604	1.47523e-06	1.58812e-05	4.20199
SNX8	0.326533	3.80688	4.89329	1.49473e-06	1.60809e-05	4.18936
CKLF	0.348666	4.51065	4.89205	1.50359e-06	1.61658e-05	4.18368
FCRL2	0.112359	0.135543	4.89127	1.50921e-06	1.62158e-05	4.18009
SMARCD1	-0.346025	5.63991	-4.89082	1.51245e-06	1.62369e-05	4.17803
OTUD3	-0.350222	2.02364	-4.89073	1.51311e-06	1.62369e-05	4.17761
ERF	-0.358505	6.82838	-4.88959	1.52129e-06	1.63143e-05	4.17243
DNAH2	-0.407595	1.06249	-4.88538	1.55211e-06	1.66341e-05	4.15314
HERC6	0.540351	3.9088	4.88348	1.56621e-06	1.67746e-05	4.14445
SPINK5	-0.452307	1.47467	-4.88259	1.57289e-06	1.68354e-05	4.14036
JAZF1	0.362772	3.51152	4.88147	1.58127e-06	1.69142e-05	4.13525
TRADD	0.308464	4.30384	4.88004	1.59212e-06	1.70195e-05	4.12867
FLRT1	-0.38801	0.665424	-4.87781	1.60907e-06	1.71897e-05	4.11849
TMEM87B	0.295744	4.56856	4.87548	1.62698e-06	1.737e-05	4.10785
TIFA	0.296098	3.46964	4.87366	1.64108e-06	1.75094e-05	4.09955
TRAM1	0.356322	7.61838	4.86986	1.67099e-06	1.78172e-05	4.08219
SLC4A8	-0.309655	1.13696	-4.86897	1.67813e-06	1.78819e-05	4.0781
UNC93B1	0.402178	6.36763	4.86612	1.70096e-06	1.81138e-05	4.0651
SMAD1	0.37965	3.47139	4.86589	1.7028e-06	1.81218e-05	4.06407
SNAI3	0.281558	1.54574	4.86512	1.70904e-06	1.81767e-05	4.06055
NR2F6	-0.416737	7.8308	-4.86333	1.72361e-06	1.832e-05	4.05239
CEP290	-0.28482	1.75325	-4.86226	1.73241e-06	1.84019e-05	4.0475
NTN4	0.656382	4.28181	4.86204	1.73422e-06	1.84095e-05	4.04649
PCLO	-0.267528	0.752734	-4.86095	1.74322e-06	1.84825e-05	4.04151
ZNFX1	0.415534	4.84318	4.86094	1.7433e-06	1.84825e-05	4.04147
ATG7	0.250343	2.99967	4.86065	1.74566e-06	1.84959e-05	4.04017
AGPAT9	0.340156	1.27633	4.85938	1.75622e-06	1.8596e-05	4.03438
MORN2	-0.347082	5.23062	-4.85654	1.78e-06	1.88359e-05	4.02145
RUFY4	0.413718	1.10131	4.85426	1.79932e-06	1.90283e-05	4.01107
LANCL2	-0.325545	4.3142	-4.85322	1.80821e-06	1.91038e-05	4.00634
ANKDD1B	-0.204503	0.407857	-4.85316	1.80873e-06	1.91038e-05	4.00606
ACTR3	0.274317	5.78795	4.85275	1.81228e-06	1.91293e-05	4.00417
LRTM2	-0.37379	0.333777	-4.85258	1.81374e-06	1.91326e-05	4.0034
RAB37	0.208754	0.59879	4.85169	1.82134e-06	1.92007e-05	3.99939
COL8A1	0.815302	3.35444	4.84987	1.83717e-06	1.93555e-05	3.99107
SH2D3C	0.305232	2.44215	4.8483	1.8508e-06	1.94868e-05	3.98397
TMEFF1	-0.435293	1.3426	-4.84716	1.86086e-06	1.95804e-05	3.97876
ITPRIPL2	0.408665	3.3806	4.8448	1.88178e-06	1.97882e-05	3.96801
PPOX	-0.30782	3.78352	-4.84409	1.88808e-06	1.9842e-05	3.9648
CNN2	0.567976	6.25477	4.84283	1.89936e-06	1.9948e-05	3.95908
RETN	0.318566	0.589364	4.84133	1.91283e-06	2.00769e-05	3.95229
NKAIN1	-0.471716	1.03219	-4.8408	1.91764e-06	2.01038e-05	3.94988
IQCA1	-0.503468	3.08557	-4.84071	1.91851e-06	2.01038e-05	3.94944
FXYD6	-0.641525	3.628	-4.84065	1.91898e-06	2.01038e-05	3.9492
RHBDL2	0.442905	2.32184	4.8405	1.92034e-06	2.01055e-05	3.94852
S1PR1	0.414009	3.01264	4.84037	1.9216e-06	2.01059e-05	3.94789
CD55	0.485482	6.2488	4.84024	1.92278e-06	2.01059e-05	3.9473
CCDC30	-0.284839	1.3244	-4.8395	1.92952e-06	2.01638e-05	3.94394
SLC25A29	-0.455413	5.08116	-4.83778	1.94522e-06	2.03152e-05	3.93615
GABRE	0.721215	2.85964	4.83745	1.94822e-06	2.03339e-05	3.93467
CLEC14A	0.322626	3.37415	4.83533	1.96785e-06	2.05261e-05	3.92504
NEXN	0.463297	2.30985	4.83441	1.97642e-06	2.06026e-05	3.92086
FAM155B	-0.592976	2.03078	-4.83421	1.97825e-06	2.06089e-05	3.91998
TMEM190	-0.7215	1.90392	-4.83327	1.98714e-06	2.06887e-05	3.91567
ATP4B	-0.250532	0.316327	-4.83289	1.99062e-06	2.07121e-05	3.91398
BCS1L	-0.221704	4.55139	-4.83244	1.99488e-06	2.07436e-05	3.91193
RNF219	-0.285898	2.91444	-4.83159	2.00294e-06	2.08145e-05	3.90806
STMND1	-0.373963	0.660808	-4.83014	2.01669e-06	2.09444e-05	3.90148
CFAP57	-0.45821	1.12629	-4.82628	2.05374e-06	2.1316e-05	3.88399
HHATL	-0.227778	0.228141	-4.82541	2.06215e-06	2.139e-05	3.88007
CCDC74B	-0.504319	1.86246	-4.82504	2.06575e-06	2.14108e-05	3.87839
USP15	0.213624	2.3892	4.82494	2.0667e-06	2.14108e-05	3.87795
ANO2	-0.446269	1.25512	-4.82369	2.07893e-06	2.15242e-05	3.87228
TRIM14	0.462654	4.43968	4.81887	2.12666e-06	2.20047e-05	3.85048
ABCC3	0.466254	2.03498	4.81698	2.14569e-06	2.21879e-05	3.84192
VNN3	0.376564	0.677097	4.81583	2.15732e-06	2.22945e-05	3.83673
EVA1C	0.577848	4.19663	4.81525	2.16327e-06	2.23422e-05	3.83409
CHSY3	0.386758	1.16033	4.81449	2.171e-06	2.24083e-05	3.83066
ZKSCAN7	-0.342726	2.12098	-4.81376	2.1785e-06	2.24719e-05	3.82735
EOGT	0.311993	2.36703	4.81178	2.19879e-06	2.26672e-05	3.81844
NOXRED1	-0.23505	0.861554	-4.81002	2.21714e-06	2.28301e-05	3.81046
CRLF3	0.260429	3.25524	4.81	2.21731e-06	2.28301e-05	3.81039
HTR2B	0.365578	1.12076	4.80897	2.22811e-06	2.29273e-05	3.80572
IL6R	0.558619	3.88051	4.80812	2.23697e-06	2.30043e-05	3.80191
PRTG	-0.235946	0.468314	-4.80737	2.24485e-06	2.30713e-05	3.79853
SPSB1	0.420285	5.61611	4.80629	2.25628e-06	2.31745e-05	3.79365
GREM1	0.510598	0.971543	4.80575	2.26204e-06	2.32058e-05	3.79121
MFSD7	0.444486	2.76241	4.80575	2.2621e-06	2.32058e-05	3.79118
CX3CR1	0.664781	2.71077	4.80527	2.26714e-06	2.32434e-05	3.78904
KAL1	0.56682	2.41624	4.80408	2.27983e-06	2.33592e-05	3.78368
AIM1	0.478567	2.65771	4.8018	2.30442e-06	2.35878e-05	3.77338
CCDC80	0.719871	3.73534	4.8017	2.30545e-06	2.35878e-05	3.77295
DNAJC1	0.328961	4.3719	4.80162	2.30636e-06	2.35878e-05	3.77257
TPM3	0.237235	7.0866	4.8011	2.31196e-06	2.36307e-05	3.77024
OLFML1	0.552378	2.93748	4.79977	2.32648e-06	2.37647e-05	3.76423
CLDN19	-0.652589	0.883653	-4.79861	2.33915e-06	2.38796e-05	3.75901
LSM14B	-0.325805	5.34962	-4.7965	2.36246e-06	2.41028e-05	3.74949
POLD4	0.284427	4.0559	4.79391	2.39129e-06	2.43821e-05	3.73785
GPR4	0.326664	2.17476	4.79129	2.42089e-06	2.46689e-05	3.72603
SEC24D	0.355706	3.69575	4.79025	2.43276e-06	2.47748e-05	3.72134
TDRP	-0.488862	2.85259	-4.78976	2.43826e-06	2.48158e-05	3.71917
ARPC3	0.248821	7.61885	4.78744	2.46498e-06	2.50726e-05	3.7087
INHA	-0.547491	2.22853	-4.78383	2.50697e-06	2.54842e-05	3.69249
GRM6	-0.171609	0.438222	-4.78328	2.51348e-06	2.55349e-05	3.69
KRTAP5-1	-0.329199	0.788085	-4.78296	2.51719e-06	2.55571e-05	3.68858
CD99	0.393883	5.70721	4.78153	2.53405e-06	2.57128e-05	3.68217
FAM117B	-0.368354	3.73339	-4.78059	2.54522e-06	2.58106e-05	3.67795
RNF130	0.251002	4.30489	4.77963	2.55669e-06	2.59112e-05	3.67363
PODXL2	-0.558588	5.74497	-4.77902	2.56409e-06	2.59705e-05	3.67086
TNNT2	-0.580166	1.33575	-4.77689	2.58976e-06	2.62146e-05	3.6613
B3GNT2	0.338232	5.49406	4.77556	2.6059e-06	2.63544e-05	3.65533
SYS1-DBNDD2	-0.184856	0.702417	-4.77549	2.60671e-06	2.63544e-05	3.65503
NKAIN4	-0.78413	1.47293	-4.77456	2.61813e-06	2.6454e-05	3.65084
CAPSL	-0.842315	2.0782	-4.77235	2.64524e-06	2.67118e-05	3.64095
NXT2	0.424889	4.53208	4.77202	2.64928e-06	2.67366e-05	3.63948
PRAP1	-0.652861	1.70325	-4.77075	2.66513e-06	2.6873e-05	3.63376
UBB	0.720513	8.57954	4.77068	2.666e-06	2.6873e-05	3.63344
SLC12A8	0.444736	3.66383	4.77038	2.66974e-06	2.68945e-05	3.6321
CFAP221	-0.318193	0.708885	-4.76998	2.6747e-06	2.69283e-05	3.63032
C1orf158	-0.50714	0.830028	-4.76947	2.68111e-06	2.69767e-05	3.62802
ATP6AP2	0.331202	7.18554	4.76863	2.69161e-06	2.70661e-05	3.62427
PREPL	-0.298761	4.47532	-4.76741	2.70697e-06	2.72042e-05	3.6188
IRGQ	-0.385093	2.99588	-4.76639	2.71996e-06	2.73185e-05	3.61421
LRP4	-0.682912	1.78528	-4.76474	2.74088e-06	2.75121e-05	3.60685
AP1B1	0.368035	5.42651	4.76371	2.75415e-06	2.76288e-05	3.60222
KLF2	0.540423	4.56519	4.76279	2.76602e-06	2.77313e-05	3.59809
ADCYAP1R1	-0.744466	1.84212	-4.76069	2.79314e-06	2.79865e-05	3.58873
AP006285.2	-0.203208	0.45638	-4.7604	2.79692e-06	2.80075e-05	3.58743
RAB27B	0.371945	1.25582	4.76013	2.80048e-06	2.80123e-05	3.58621
ABHD1	-0.273473	1.22524	-4.76011	2.80073e-06	2.80123e-05	3.58613
KCNK13	0.428278	1.4251	4.75352	2.8881e-06	2.88519e-05	3.55664
THBS1	0.671779	5.41241	4.75352	2.88811e-06	2.88519e-05	3.55664
SIAH3	-0.490215	1.28365	-4.75123	2.91904e-06	2.91436e-05	3.54642
NACAD	-0.495536	2.43851	-4.75077	2.92535e-06	2.91892e-05	3.54435
ZNF711	-0.494493	2.09879	-4.75034	2.93122e-06	2.92304e-05	3.54242
AHR	0.41656	5.0838	4.74996	2.9364e-06	2.92646e-05	3.54073
KCNH3	-0.666634	2.46262	-4.74883	2.95182e-06	2.94009e-05	3.5357
CLMP	0.570054	2.22593	4.74526	3.00129e-06	2.98758e-05	3.51976
CDHR3	-0.447702	1.03181	-4.74446	3.01252e-06	2.99699e-05	3.51617
PRRT1	-0.420642	2.41275	-4.74033	3.07092e-06	3.05327e-05	3.49775
ZNF559-ZNF177	-0.229118	0.616395	-4.73842	3.09817e-06	3.07854e-05	3.48928
SALL2	-0.559526	3.82001	-4.73805	3.10355e-06	3.08207e-05	3.48761
RP9	-0.237989	4.24682	-4.7368	3.12161e-06	3.09816e-05	3.48204
UBXN8	-0.342031	3.03157	-4.73663	3.12417e-06	3.09887e-05	3.48126
ELOVL2	-0.412561	1.06338	-4.7347	3.15216e-06	3.12479e-05	3.4727
GMDS	0.321145	4.14985	4.73411	3.16085e-06	3.13155e-05	3.47006
EHBP1L1	0.391924	4.37668	4.73362	3.16801e-06	3.1368e-05	3.46789
NKPD1	-0.216884	0.612744	-4.73342	3.17097e-06	3.13788e-05	3.46699
IBSP	0.611802	1.70777	4.73255	3.18384e-06	3.1484e-05	3.46311
C2orf71	-0.0785396	0.105328	-4.73245	3.18535e-06	3.1484e-05	3.46265
SBNO2	0.413759	5.23577	4.73111	3.20517e-06	3.16612e-05	3.4567
SP110	0.251952	1.42886	4.72908	3.23547e-06	3.19417e-05	3.44767
ARMC3	-0.546764	1.71205	-4.72848	3.24458e-06	3.20128e-05	3.44498
PLK3	0.434707	4.10259	4.72754	3.25866e-06	3.21328e-05	3.44083
ADTRP	0.455536	1.18427	4.72726	3.2629e-06	3.21558e-05	3.43958
ZNF546	-0.294213	1.41271	-4.72645	3.27526e-06	3.22586e-05	3.43595
SHANK2	-0.407638	1.70635	-4.72454	3.30429e-06	3.25254e-05	3.42749
MBNL1	0.239709	4.63326	4.72383	3.31521e-06	3.26064e-05	3.42432
ADCY7	0.420209	1.8899	4.72375	3.3164e-06	3.26064e-05	3.42398
TSPAN7	-0.805685	3.91154	-4.71796	3.40661e-06	3.34738e-05	3.39823
SLC4A3	-0.477886	3.57977	-4.71672	3.42615e-06	3.36461e-05	3.39275
PARM1	0.435609	2.24329	4.71485	3.45591e-06	3.39185e-05	3.38445
TMEM50A	0.257015	6.80817	4.71291	3.48703e-06	3.42039e-05	3.37586
LPCAT2	0.35112	3.19372	4.71203	3.50135e-06	3.43243e-05	3.37193
CCDC14	-0.344187	3.36308	-4.71117	3.51532e-06	3.44412e-05	3.36811
ITGBL1	0.433353	0.836132	4.70992	3.53558e-06	3.46194e-05	3.3626
FAM171A2	-0.631908	4.8207	-4.70958	3.54118e-06	3.4654e-05	3.36108
MOK	-0.321384	2.25202	-4.70829	3.56246e-06	3.48419e-05	3.35533
SPDYA	-0.192487	0.950642	-4.70791	3.56868e-06	3.48825e-05	3.35366
MS4A2	0.0996178	0.125586	4.70669	3.58877e-06	3.50584e-05	3.34828
DACH1	-0.756474	2.89219	-4.70637	3.59414e-06	3.50904e-05	3.34684
FARP1	-0.385872	3.29749	-4.70414	3.63136e-06	3.54332e-05	3.33697
ST18	0.0340648	0.0493662	4.70346	3.64277e-06	3.55239e-05	3.33396
REEP5	0.269142	6.20936	4.70298	3.65079e-06	3.55814e-05	3.33185
PRSS33	-1.08605	2.29652	-4.70278	3.65417e-06	3.55937e-05	3.33096
ARFIP1	0.268731	4.44873	4.70181	3.67062e-06	3.57148e-05	3.32665
CIB4	-0.22975	0.37015	-4.7018	3.67085e-06	3.57148e-05	3.32659
SLC41A2	0.38071	2.79376	4.70031	3.69612e-06	3.59397e-05	3.32002
SMCO4	0.395124	4.5328	4.69997	3.70185e-06	3.59746e-05	3.31853
FAM84A	-0.732559	2.37818	-4.69975	3.70577e-06	3.59786e-05	3.31752
TFPI	0.30847	1.12592	4.6997	3.70655e-06	3.59786e-05	3.31732
YIPF5	0.261735	5.18298	4.69954	3.70927e-06	3.59842e-05	3.31661
GNB3	-0.357741	0.992109	-4.69885	3.72117e-06	3.60788e-05	3.31354
SIL1	0.288214	4.51324	4.6974	3.74609e-06	3.62994e-05	3.30714
PURG	-0.26264	0.533608	-4.69455	3.79572e-06	3.67591e-05	3.29452
MTMR7	-0.275958	1.03314	-4.69417	3.80231e-06	3.68017e-05	3.29286
ACTR3B	-0.290108	3.03429	-4.69358	3.81263e-06	3.68803e-05	3.29026
CCDC33	-0.485912	1.32757	-4.6933	3.81757e-06	3.69068e-05	3.28902
TEKT1	-0.610927	1.12804	-4.69275	3.82718e-06	3.69785e-05	3.28661
SNAI2	0.658295	3.44674	4.69135	3.852e-06	3.71968e-05	3.28041
SS18L1	-0.301522	3.66324	-4.69005	3.8752e-06	3.73994e-05	3.27465
PRR4	-0.200059	0.95523	-4.68922	3.8901e-06	3.75216e-05	3.27098
ZNF43	-0.357486	3.34505	-4.68752	3.92062e-06	3.77943e-05	3.26348
EIF5A2	0.371822	2.00519	4.68592	3.94957e-06	3.80514e-05	3.25643
CFAP52	-0.395056	0.980284	-4.68377	3.98884e-06	3.84078e-05	3.24695
TNFSF4	0.471597	2.02886	4.68245	4.01309e-06	3.86191e-05	3.24114
SIX5	-0.374133	4.44811	-4.68197	4.022e-06	3.86826e-05	3.23901
OMD	0.653879	1.39314	4.68145	4.03173e-06	3.87541e-05	3.23669
CELF2	0.458627	2.52318	4.68056	4.04819e-06	3.88899e-05	3.23279
GARNL3	-0.271389	1.29913	-4.67748	4.10585e-06	3.93994e-05	3.21923
NPAS1	-0.278326	1.24958	-4.67748	4.10591e-06	3.93994e-05	3.21922
GRID2	-0.290117	0.425141	-4.6764	4.12633e-06	3.95727e-05	3.21447
ACTA2	0.731213	6.42578	4.67567	4.14024e-06	3.96835e-05	3.21124
CYP2J2	0.481005	2.36589	4.67474	4.15788e-06	3.98297e-05	3.20716
CISH	0.423032	3.22839	4.67443	4.1639e-06	3.98557e-05	3.20578
PPP1R42	-0.356402	0.772105	-4.67435	4.16534e-06	3.98557e-05	3.20545
PRKCSH	-0.327773	8.14282	-4.67413	4.1697e-06	3.98747e-05	3.20444
ABCB1	0.224571	0.700127	4.67226	4.20561e-06	4.01952e-05	3.19622
RAB12	0.286791	5.67781	4.67108	4.22843e-06	4.03903e-05	3.19104
AKAP8L	-0.354603	5.03787	-4.66761	4.29637e-06	4.10159e-05	3.17576
SCG3	-0.416938	0.437862	-4.66478	4.35245e-06	4.15277e-05	3.16334
FBXO32	0.63889	4.6522	4.6642	4.36417e-06	4.16112e-05	3.16076
FBXO17	-0.646223	3.35915	-4.6641	4.36616e-06	4.16112e-05	3.16032
CLIC1	0.248672	8.76394	4.66345	4.37922e-06	4.17119e-05	3.15746
STX7	0.259389	3.01502	4.66227	4.40291e-06	4.19138e-05	3.15229
TDRD7	0.382915	3.51566	4.66098	4.42907e-06	4.21389e-05	3.14661
C6orf1	0.299834	5.15009	4.65904	4.46853e-06	4.24902e-05	3.13811
RAD52	-0.338705	3.14298	-4.65639	4.52308e-06	4.29846e-05	3.12649
LRP10	0.387583	6.59902	4.65575	4.53643e-06	4.30868e-05	3.12366
RNF13	0.269134	4.99172	4.65563	4.53897e-06	4.30868e-05	3.12313
FGFRL1	-0.556009	6.84761	-4.65535	4.54467e-06	4.31165e-05	3.12193
SOCS7	-0.375052	2.69388	-4.65424	4.5679e-06	4.32673e-05	3.11704
KBTBD7	-0.284773	2.98765	-4.65415	4.56975e-06	4.32673e-05	3.11665
FAM214B	0.300912	2.86717	4.65412	4.57041e-06	4.32673e-05	3.11651
DUSP19	-0.300386	1.87208	-4.6541	4.57087e-06	4.32673e-05	3.11642
CISD2	0.244271	5.10422	4.65354	4.58257e-06	4.33536e-05	3.11397
PLCB4	-0.460608	2.37269	-4.65324	4.58875e-06	4.33876e-05	3.11268
CAMK4	0.175216	0.432983	4.65308	4.59214e-06	4.33952e-05	3.11197
TOX3	-0.497826	0.694986	-4.65139	4.62776e-06	4.37072e-05	3.10456
ZNF3	-0.259732	4.55634	-4.6502	4.65312e-06	4.3922e-05	3.09933
DZANK1	-0.294456	1.82265	-4.64679	4.72632e-06	4.45878e-05	3.08438
ACKR4	0.40916	0.91518	4.64468	4.77205e-06	4.4994e-05	3.07515
TMEM9B	0.263392	5.21583	4.64441	4.77791e-06	4.5024e-05	3.07398
COL18A1	-0.482365	6.75807	-4.6441	4.78464e-06	4.50621e-05	3.07263
CYP1B1	0.59782	3.17189	4.64197	4.83144e-06	4.54559e-05	3.0633
SRGAP3	-0.369103	3.04862	-4.64195	4.83188e-06	4.54559e-05	3.06322
SOX5	-0.450087	2.10111	-4.64152	4.8414e-06	4.552e-05	3.06133
STAT3	0.311862	6.06381	4.64128	4.84668e-06	4.55441e-05	3.06029
PCP4	-1.15777	3.70775	-4.64095	4.85414e-06	4.55887e-05	3.05881
SFN	0.702691	5.59857	4.6407	4.85968e-06	4.56152e-05	3.05772
CPSF6	-0.253481	4.9503	-4.64028	4.86898e-06	4.56769e-05	3.05589
MT1E	0.875635	6.9494	4.63962	4.88367e-06	4.57892e-05	3.053
DCAF12L2	-0.427102	1.11767	-4.63701	4.94219e-06	4.6312e-05	3.04159
DNAAF3	-0.503798	2.33303	-4.63673	4.94847e-06	4.63449e-05	3.04038
MYL12A	0.265224	7.95014	4.63327	5.02735e-06	4.70574e-05	3.02523
ZNF334	-0.471432	2.25147	-4.63276	5.03893e-06	4.71395e-05	3.02303
XIRP1	0.217064	0.298259	4.63129	5.0728e-06	4.743e-05	3.01661
STARD5	0.160185	0.812308	4.62884	5.12988e-06	4.7937e-05	3.00589
S100B	0.543135	1.6605	4.6279	5.15177e-06	4.81148e-05	3.00181
APOA1	-1.02411	6.55364	-4.62771	5.15644e-06	4.81316e-05	3.00095
XCL1	0.506894	1.71957	4.62395	5.2454e-06	4.89347e-05	2.98457
MYEF2	-0.314868	2.88446	-4.62342	5.25815e-06	4.90264e-05	2.98224
LY6E	0.544357	10.132	4.62294	5.26948e-06	4.91048e-05	2.98018
CPPED1	0.333865	3.59923	4.62214	5.28887e-06	4.92581e-05	2.97666
PLCH1	-0.458598	1.36116	-4.62162	5.30146e-06	4.9348e-05	2.97438
CSGALNACT2	0.302941	3.9689	4.61976	5.34648e-06	4.97394e-05	2.96629
PBX4	-0.332368	2.11751	-4.61794	5.39091e-06	5.0125e-05	2.95836
RAPGEFL1	-0.395577	2.67267	-4.6176	5.39928e-06	5.01751e-05	2.95688
CCAR2	-0.314344	4.78573	-4.61542	5.45309e-06	5.0647e-05	2.94738
SERPING1	0.436871	8.69214	4.61463	5.47256e-06	5.07998e-05	2.94397
C15orf26	-0.411447	0.923414	-4.61372	5.4953e-06	5.09826e-05	2.94
KCNIP1	-0.603688	1.47242	-4.61264	5.5223e-06	5.12049e-05	2.9353
CASP3	0.307632	4.69477	4.61128	5.55659e-06	5.14943e-05	2.92938
GPR98	-0.212092	0.376289	-4.60876	5.62067e-06	5.20594e-05	2.9184
TGFBR2	0.431943	5.16382	4.60813	5.63659e-06	5.21781e-05	2.91569
SPAG8	-0.458593	2.00691	-4.6079	5.64264e-06	5.22053e-05	2.91467
CBX2	-0.597733	3.3839	-4.60687	5.66903e-06	5.24206e-05	2.9102
MYT1	-0.400854	0.854824	-4.60084	5.82629e-06	5.38451e-05	2.884
ANKRD31	-0.113657	0.321037	-4.60012	5.84539e-06	5.39919e-05	2.88087
DHX34	-0.308292	4.45882	-4.59896	5.87607e-06	5.42454e-05	2.87586
ZC3H8	-0.2629	2.63365	-4.59779	5.90752e-06	5.45057e-05	2.87075
TTC9	0.542557	3.4048	4.59744	5.91681e-06	5.45615e-05	2.86925
ACKR2	0.684676	2.13429	4.59703	5.92774e-06	5.46322e-05	2.86748
DUSP3	0.309934	4.70338	4.59631	5.94734e-06	5.47828e-05	2.86432
PARP10	0.490971	5.62097	4.5919	6.06722e-06	5.58563e-05	2.84522
MLK4	-0.394216	3.11787	-4.59075	6.0988e-06	5.61163e-05	2.84025
ZBTB39	-0.340315	3.14053	-4.5904	6.10861e-06	5.61758e-05	2.83871
AQP9	0.709849	2.7785	4.58954	6.13237e-06	5.63634e-05	2.83499
ALKBH2	-0.293512	4.5531	-4.58701	6.20308e-06	5.69821e-05	2.82402
IGSF9	-0.470699	5.12577	-4.58676	6.21003e-06	5.70148e-05	2.82295
AAED1	0.285634	3.74138	4.58583	6.23626e-06	5.72243e-05	2.81892
DNMT3A	-0.403679	3.93345	-4.58424	6.28115e-06	5.76046e-05	2.81205
L3MBTL1	-0.356614	1.99197	-4.58373	6.29577e-06	5.77072e-05	2.80983
TMEM51	0.325906	4.73876	4.58297	6.31749e-06	5.78747e-05	2.80653
PCNXL4	-0.249038	2.27772	-4.58211	6.34192e-06	5.80668e-05	2.80284
UGGT2	-0.263341	2.48157	-4.58187	6.34902e-06	5.81001e-05	2.80177
MLXIPL	-0.66606	3.10666	-4.58071	6.38234e-06	5.83732e-05	2.79676
GDF10	-0.540783	0.780936	-4.57858	6.44404e-06	5.89054e-05	2.78755
S100A11	0.414648	11.205	4.57808	6.45868e-06	5.90071e-05	2.78538
PI4K2B	0.291687	3.40031	4.57502	6.54844e-06	5.97817e-05	2.77217
ZNF891	-0.228937	1.02458	-4.57495	6.55059e-06	5.97817e-05	2.77186
QPCT	0.641865	3.32337	4.57466	6.55902e-06	5.97938e-05	2.77063
GPR1	0.41664	1.16384	4.57466	6.55904e-06	5.97938e-05	2.77062
TRAF3IP1	-0.323839	3.878	-4.5734	6.59635e-06	6.01013e-05	2.7652
PPM1E	-0.245153	0.530437	-4.57291	6.61122e-06	6.0204e-05	2.76304
PMP22	0.499764	4.74976	4.57275	6.61579e-06	6.0213e-05	2.76238
APOBEC3C	0.388434	5.57878	4.57191	6.64087e-06	6.04086e-05	2.75876
ENSG00000260220	-0.376384	0.815773	-4.57134	6.65822e-06	6.05335e-05	2.75627
KCNS3	0.508805	2.50654	4.57053	6.68246e-06	6.0721e-05	2.75279
BDP1	-0.294307	2.73409	-4.56977	6.7054e-06	6.08965e-05	2.74951
ZSCAN21	-0.248157	3.18419	-4.56957	6.71153e-06	6.09192e-05	2.74864
CNPY2	-0.243361	4.98646	-4.56669	6.79913e-06	6.1681e-05	2.73623
ATP2B3	-0.249802	0.433927	-4.56581	6.82621e-06	6.18931e-05	2.73243
CMPK1	0.271023	5.95414	4.56527	6.8429e-06	6.2011e-05	2.73009
PAMR1	0.405186	1.79275	4.56419	6.87621e-06	6.22793e-05	2.72544
HCCS	0.309429	4.76158	4.56279	6.91981e-06	6.26403e-05	2.7194
CARKD	-0.279274	4.80685	-4.55994	7.0091e-06	6.34144e-05	2.70713
LRRC71	-0.422834	0.751482	-4.55939	7.02651e-06	6.35376e-05	2.70476
BZRAP1	-0.417491	2.83764	-4.55909	7.03618e-06	6.35908e-05	2.70344
JAK3	0.446793	2.93727	4.55712	7.09882e-06	6.41225e-05	2.69496
PDE1B	0.326457	1.37327	4.55636	7.12309e-06	6.42776e-05	2.6917
TAS2R4	-0.212306	0.662427	-4.55634	7.12366e-06	6.42776e-05	2.69162
DRC1	-0.571023	1.39232	-4.55569	7.14466e-06	6.44324e-05	2.68881
C1GALT1C1	0.283183	5.4639	4.55495	7.16846e-06	6.46124e-05	2.68563
MGAT1	0.30139	6.07519	4.55399	7.19935e-06	6.4856e-05	2.68151
ZDHHC11B	-0.396792	1.06417	-4.55345	7.21679e-06	6.49782e-05	2.6792
MZF1	-0.354788	3.70475	-4.55296	7.23292e-06	6.50885e-05	2.67706
C10orf82	-0.475563	1.20289	-4.55147	7.28142e-06	6.54596e-05	2.67067
TUB	-0.473302	2.42423	-4.55145	7.28196e-06	6.54596e-05	2.6706
UBXN11	-0.362584	4.53638	-4.55101	7.29661e-06	6.55562e-05	2.66868
ZCCHC5	0.156022	0.265783	4.55028	7.32049e-06	6.57355e-05	2.66555
EDEM1	0.338166	3.66182	4.54944	7.34819e-06	6.5949e-05	2.66194
MDM1	-0.298883	2.64278	-4.54845	7.38081e-06	6.62064e-05	2.6577
ACTB	0.227081	12.0889	4.54806	7.39403e-06	6.62895e-05	2.65599
ASIC4	-0.0769767	0.113115	-4.54727	7.4203e-06	6.64895e-05	2.6526
ENPP2	0.431261	2.81979	4.54665	7.44087e-06	6.66383e-05	2.64995
HES6	-0.552245	4.12883	-4.54565	7.47441e-06	6.6903e-05	2.64565
MT1H	1.03283	3.74015	4.54446	7.51455e-06	6.72264e-05	2.64053
ZNF366	0.161127	0.561444	4.54409	7.52684e-06	6.73004e-05	2.63897
PTDSS2	-0.280191	3.96325	-4.54167	7.60898e-06	6.79987e-05	2.62859
RNF149	0.214068	4.67593	4.54135	7.61994e-06	6.80604e-05	2.62721
VWA5B2	-0.308344	0.590775	-4.54069	7.64258e-06	6.82263e-05	2.62437
RASSF2	0.431357	3.03163	4.54038	7.65314e-06	6.82843e-05	2.62305
ATXN7L2	-0.324221	2.67505	-4.53666	7.78219e-06	6.93987e-05	2.60706
SIDT1	0.281764	0.826698	4.53547	7.82354e-06	6.97305e-05	2.60199
SBK1	-0.558847	4.54823	-4.53526	7.8312e-06	6.97617e-05	2.60106
CCL24	0.39908	0.728671	4.53502	7.83946e-06	6.97803e-05	2.60005
RGS19	0.273687	5.4507	4.53496	7.8416e-06	6.97803e-05	2.59979
CYTH1	0.285959	3.5914	4.53445	7.85945e-06	6.9902e-05	2.59762
TIGD2	0.303865	2.4769	4.53261	7.92458e-06	7.0444e-05	2.58972
BST2	0.699988	9.5957	4.53049	8.00011e-06	7.10777e-05	2.58065
NFATC1	0.424307	2.39883	4.52958	8.03302e-06	7.13324e-05	2.57673
ANAPC10	0.230342	3.07249	4.52882	8.0602e-06	7.15359e-05	2.5735
TINAGL1	0.511896	3.90886	4.5283	8.07916e-06	7.16302e-05	2.57125
RASGRP1	0.375037	1.82683	4.52829	8.07936e-06	7.16302e-05	2.57123
SPECC1	0.40977	3.35707	4.5277	8.10076e-06	7.1782e-05	2.5687
EPHX2	-0.399412	3.36661	-4.52723	8.11806e-06	7.18973e-05	2.56666
RIMKLB	-0.313146	3.58684	-4.52672	8.13652e-06	7.20228e-05	2.56449
VGF	-0.408567	0.715676	-4.52623	8.15416e-06	7.21409e-05	2.56242
DDX51	-0.297818	3.47704	-4.52531	8.18783e-06	7.24006e-05	2.55848
C7orf61	-0.362102	1.4298	-4.52248	8.29228e-06	7.32855e-05	2.54636
MT1G	1.10182	6.41681	4.52114	8.34193e-06	7.36856e-05	2.54065
PIFO	-0.671179	2.91068	-4.52097	8.34829e-06	7.3703e-05	2.53992
TTC3	-0.315351	4.5863	-4.52011	8.38048e-06	7.39483e-05	2.53625
PPP5D1	-0.123925	0.595393	-4.5193	8.41117e-06	7.41801e-05	2.53275
ZNF496	-0.354803	4.17732	-4.51845	8.44285e-06	7.44203e-05	2.52916
PLRG1	0.263273	4.65655	4.5168	8.5057e-06	7.4935e-05	2.52207
CBR1	0.313621	5.42777	4.51619	8.52892e-06	7.51001e-05	2.51946
GYLTL1B	-0.501722	5.66085	-4.5149	8.57818e-06	7.54943e-05	2.51396
ATP6V0D2	0.2163	0.408762	4.51348	8.63272e-06	7.59344e-05	2.5079
ELK3	0.375482	4.38196	4.51168	8.70237e-06	7.6507e-05	2.50022
TOR1B	0.28327	4.41948	4.5113	8.71709e-06	7.65963e-05	2.4986
ZNF133	-0.275526	3.35664	-4.51011	8.76336e-06	7.69626e-05	2.49354
RPS2	-0.3085	11.2058	-4.50958	8.78414e-06	7.70963e-05	2.49128
LRP8	0.429587	2.91776	4.50949	8.78777e-06	7.70963e-05	2.49088
ISPD	-0.214404	1.10996	-4.5093	8.79511e-06	7.71203e-05	2.49009
CCDC108	-0.338099	0.536616	-4.50821	8.83787e-06	7.74548e-05	2.48545
SLC27A1	-0.395036	4.17127	-4.50538	8.95027e-06	7.83815e-05	2.47337
USP18	0.510667	4.68485	4.50531	8.95294e-06	7.83815e-05	2.47309
CTNNA2	-0.505687	1.46612	-4.50372	9.0168e-06	7.88993e-05	2.46629
TTC21A	-0.336153	1.76002	-4.50323	9.03669e-06	7.90322e-05	2.46419
TANGO2	0.274827	3.07878	4.50264	9.06013e-06	7.91959e-05	2.46171
ODC1	-0.405235	7.44908	-4.50163	9.10108e-06	7.95124e-05	2.4574
KCNRG	-0.32215	0.844206	-4.50111	9.12218e-06	7.96553e-05	2.45519
CLVS1	-0.276604	0.603368	-4.50084	9.13346e-06	7.97123e-05	2.45401
PCK2	0.333557	4.07746	4.50023	9.15796e-06	7.98847e-05	2.45145
GLI2	-0.523263	2.26376	-4.50009	9.16362e-06	7.98925e-05	2.45086
ZNF594	-0.315792	1.84123	-4.49875	9.21883e-06	8.03321e-05	2.44512
DCDC1	-0.150243	0.376567	-4.49852	9.22806e-06	8.03708e-05	2.44416
PSMA4	0.270013	5.31087	4.49535	9.35912e-06	8.147e-05	2.43069
CRISPLD2	0.653311	3.09544	4.49491	9.37771e-06	8.15895e-05	2.42879
ZNF385A	0.405739	5.12068	4.49376	9.42583e-06	8.19656e-05	2.4239
SGMS1	0.340066	3.88883	4.49264	9.47291e-06	8.23323e-05	2.41914
RMND5A	-0.265614	4.97201	-4.49224	9.48961e-06	8.24349e-05	2.41746
SLIT1	-0.325254	0.464797	-4.49061	9.55889e-06	8.29937e-05	2.41051
C5orf49	-0.643392	2.51273	-4.49034	9.57005e-06	8.30476e-05	2.40939
RNF224	-0.464856	1.35099	-4.48966	9.59904e-06	8.32561e-05	2.4065
VAV3	0.780182	2.94534	4.4881	9.66603e-06	8.37939e-05	2.39986
SUSD1	0.351443	2.47307	4.48619	9.74836e-06	8.4464e-05	2.39175
SLFN5	0.393432	3.92196	4.48595	9.75888e-06	8.45115e-05	2.39072
PAIP2B	-0.374638	2.89679	-4.48582	9.7644e-06	8.45157e-05	2.39018
AVPR1A	0.330261	1.30134	4.48376	9.85403e-06	8.52475e-05	2.38145
FAM186B	-0.156957	0.577177	-4.48322	9.87791e-06	8.53688e-05	2.37914
PTPN6	0.249814	4.88835	4.48321	9.87822e-06	8.53688e-05	2.37911
IFT88	-0.268379	2.36673	-4.48085	9.98223e-06	8.62232e-05	2.3691
CENPV	-0.556607	3.15974	-4.47838	1.00924e-05	8.71176e-05	2.35862
KREMEN2	-0.639837	3.18039	-4.4783	1.00962e-05	8.71176e-05	2.35826
SNRPA	-0.192506	6.78225	-4.47765	1.01252e-05	8.73232e-05	2.35552
HS3ST1	0.349191	1.87586	4.47739	1.01368e-05	8.73783e-05	2.35443
RAB20	0.332662	5.12321	4.47646	1.01785e-05	8.76932e-05	2.3505
C19orf45	-0.366729	1.43006	-4.47359	1.03092e-05	8.87052e-05	2.33832
DHX35	-0.284198	3.401	-4.47354	1.03114e-05	8.87052e-05	2.33812
COL20A1	-0.0697709	0.0732981	-4.47353	1.03119e-05	8.87052e-05	2.33807
IL1RL1	0.161087	0.231414	4.47309	1.0332e-05	8.88328e-05	2.33621
TNFSF14	0.501567	1.51809	4.471	1.04284e-05	8.96155e-05	2.32734
BICC1	0.496807	2.14201	4.47082	1.04367e-05	8.96411e-05	2.32658
FOXA2	-0.757556	2.48508	-4.47055	1.04488e-05	8.9699e-05	2.32547
CAPN10	-0.282788	2.70858	-4.46849	1.05449e-05	9.04778e-05	2.31673
MMP13	0.820943	1.29494	4.46834	1.05519e-05	9.04922e-05	2.31609
BEX1	-1.04653	3.02978	-4.46792	1.05715e-05	9.06135e-05	2.31432
SAMD1	-0.285719	7.1681	-4.46748	1.05919e-05	9.06963e-05	2.31248
PQLC2L	0.477255	1.20332	4.46748	1.05919e-05	9.06963e-05	2.31247
TRIM71	-0.45692	0.772259	-4.46623	1.06509e-05	9.11549e-05	2.30717
ERCC1	-0.260251	5.04964	-4.46608	1.0658e-05	9.11686e-05	2.30654
RDH12	-0.185799	0.564323	-4.46569	1.06762e-05	9.12777e-05	2.30491
LRIG2	-0.263	2.73851	-4.46532	1.06938e-05	9.13816e-05	2.30334
GDF11	-0.547404	3.5786	-4.4651	1.07042e-05	9.14244e-05	2.3024
SIX3	-0.848806	1.23501	-4.46326	1.07919e-05	9.21266e-05	2.29461
GRIK5	-0.786325	3.47407	-4.46076	1.09117e-05	9.31021e-05	2.28407
WNT2B	-0.406575	1.12991	-4.45984	1.09564e-05	9.34356e-05	2.28017
ENSG00000239665	-0.2631	1.2817	-4.45905	1.09947e-05	9.37143e-05	2.27684
CFAP45	-0.596289	2.34604	-4.45859	1.10167e-05	9.38549e-05	2.27492
SLC19A3	0.498344	1.72154	4.45768	1.10613e-05	9.41866e-05	2.27107
ING1	-0.258021	3.61759	-4.45732	1.10788e-05	9.4288e-05	2.26956
KDM4D	-0.277452	1.89412	-4.45584	1.11514e-05	9.48579e-05	2.26332
HEPH	0.454826	2.00582	4.45547	1.11699e-05	9.4967e-05	2.26174
MALL	0.403571	1.15069	4.45529	1.11787e-05	9.49935e-05	2.26099
RAB3IL1	0.308052	4.24372	4.45509	1.11887e-05	9.50308e-05	2.26013
BTG1	0.262627	5.57561	4.45309	1.12879e-05	9.58248e-05	2.2517
SCPEP1	0.479766	4.99173	4.45239	1.13229e-05	9.60058e-05	2.24875
ARHGEF4	-0.393731	2.02708	-4.45233	1.13261e-05	9.60058e-05	2.24847
UBE2W	0.234091	3.64509	4.45232	1.13264e-05	9.60058e-05	2.24845
MYO7A	0.316124	1.5734	4.45219	1.13331e-05	9.60139e-05	2.24789
ALS2CR12	-0.246389	0.566589	-4.45189	1.13478e-05	9.60901e-05	2.24665
KCNJ13	-0.282464	0.534798	-4.45111	1.13872e-05	9.63751e-05	2.24334
RND2	-0.467277	1.90079	-4.45045	1.14202e-05	9.66054e-05	2.24058
MASP2	-0.23029	0.747349	-4.44918	1.14843e-05	9.70991e-05	2.23523
DYSF	0.354317	2.47519	4.44881	1.15031e-05	9.71762e-05	2.23368
DGKD	-0.321961	2.59389	-4.44878	1.1505e-05	9.71762e-05	2.23351
TMA16	0.238511	3.75942	4.44847	1.15205e-05	9.72576e-05	2.23223
SMYD5	-0.228744	5.35471	-4.44805	1.15422e-05	9.73919e-05	2.23043
TMEM232	-0.200599	0.442371	-4.4473	1.15802e-05	9.76639e-05	2.22729
FBXO46	-0.311404	4.92161	-4.43862	1.2032e-05	0.000101423	2.19076
MITF	0.347479	1.80619	4.43751	1.20909e-05	0.000101868	2.1861
2019-03-01	-0.348321	2.50236	-4.43697	1.21199e-05	0.000102061	2.18381
DNAL1	-0.240018	2.48712	-4.4359	1.21769e-05	0.00010249	2.17933
KIAA0895L	-0.369709	2.97744	-4.43558	1.21941e-05	0.000102583	2.17799
BIVM	-0.30945	2.8398	-4.43269	1.23501e-05	0.000103843	2.16585
PRRG4	0.433643	3.70476	4.43201	1.23872e-05	0.000104103	2.16299
ZNF664	-0.335471	6.32276	-4.43094	1.24457e-05	0.000104542	2.15849
[truncated: 14,785 more rows]
