# Supplementary material for: Immune profiling reveals prognostic genes in high-grade serous ovarian cancer
Source: Aging (Albany NY). 2020 Jun 16;12(12):11398–415. doi: 10.18632/aging.103199 (PMC7343445; doi:10.18632/aging.103199)
Supplement: Supplementary Table 3 [file aging-12-103199-s002..xlsx]

## Sheet: Supplementary Table 3
Supplementary Table 3. A total of 48 DEGs were shown to predict overall survival.
GBP5	0.00850342
GPR171	0.0137565
CXCL9	0.00859744
HLA-F	0.0168278
RARRES3	0.0116297
CCL8	0.0333723
MZB1	0.0140652
UBD	0.022604
CCL19	0.00686215
CD48	0.0151507
SIRPG	0.043776
ETV7	0.000874139
GBP4	0.00665825
CTSW	0.0202181
GBP1	0.019414
IGF2	0.0228801
CD2	0.00256917
GNLY	0.0404233
CTSS	0.0156652
CD8A	0.0217654
PLA2G2D	0.0207347
IDO1	0.00990596
PDCD1LG2	0.0256987
FOXP3	0.00495983
CD38	0.000523658
CD79A	0.0118204
CD3E	0.031573
CCR1	0.0493971
BATF2	0.000402269
CXCL11	0.000941013
SLAMF7	0.00150017
ALOX5AP	0.00705218
CD3G	0.00162272
CD27	0.0247246
IL7R	0.0325728
FPR1	0.0333717
SLAMF6	0.0214113
APOL6	0.00602016
AIM2	0.00731459
CCL5	0.0244591
S1PR4	0.0253859
TAP1	0.007474
SELL	0.000320622
GZMB	0.00705444
TNFSF13B	0.0147887
IL2RG	0.00988866
CCL18	0.00833802
CXCL13	0.000272905
