# Supplementary material for: Immune profiling reveals prognostic genes in high-grade serous ovarian cancer
Source: Aging (Albany NY). 2020 Jun 16;12(12):11398–415. doi: 10.18632/aging.103199 (PMC7343445; doi:10.18632/aging.103199)
Supplement: Supplementary Table 4 [file aging-12-103199-s001..xlsx]

## Sheet: SupplementaryTable 4_PPInetwork
node1	node2
CD3G	CD3E
CCL19	CXCL13
CCL5	CCR1
CCL5	CXCL9
CXCL9	CCL19
CXCL9	CXCL13
CCL5	CXCL11
CXCL9	CXCL11
CCL19	CCR1
IL2RG	IL7R
CXCL11	CXCL13
CCL19	CXCL11
CCL5	CXCL13
CXCL9	CCR1
CXCL11	CCR1
CD3G	CD8A
CD8A	CD3E
CCR1	CXCL13
IL2RG	CD3E
CD3G	IL2RG
CD48	CD2
TAP1	HLA-F
GNLY	GZMB
CCL8	CCR1
CD8A	IL2RG
CCL5	FPR1
FPR1	S1PR4
CD3G	IL7R
FPR1	CCR1
CD8A	HLA-F
PDCD1LG2	CD3E
CXCL13	S1PR4
CCL5	S1PR4
FPR1	CCL19
CCL5	CCL19
CCL19	S1PR4
CCR1	S1PR4
FPR1	CXCL13
GBP1	HLA-F
FPR1	CXCL9
CD3E	HLA-F
CD2	CD3E
CD3G	PDCD1LG2
GBP5	HLA-F
GBP4	HLA-F
CXCL9	S1PR4
CD3G	HLA-F
Supplementary Table 4. The list of connected nodes for each gene intersection.
FPR1	CXCL11
CXCL11	S1PR4
CD8A	CD2
CD2	GZMB
CD27	CD38
FOXP3	IL7R
FOXP3	SELL
IL7R	SELL
CCL8	CXCL9
CCL18	CCR1
CD27	SELL
GBP1	GBP5
IL7R	CD27
CCL8	CXCL11
CD8A	GZMB
IDO1	FOXP3
CD2	CD27
CCL18	CCL19
FOXP3	GZMB
GBP5	CXCL9
CCL5	FOXP3
IDO1	CXCL9
CD27	GZMB
CD48	SLAMF6
CD48	SLAMF7
CD2	IL7R
CD3G	CD2
SELL	GZMB
CD2	CD79A
CCL18	CXCL9
IL7R	GZMB
CD2	CD38
FOXP3	CD27
TNFSF13B	CXCL13
CCL19	IL7R
CCL8	CCL19
CCL5	GZMB
IDO1	PDCD1LG2
FOXP3	CD3E
CD2	SELL
SELL	CD38
PDCD1LG2	FOXP3
CD38	CD79A
CD3E	SELL
CCL5	CD2
CD48	CD3E
IL7R	CD38
TNFSF13B	CD27
FOXP3	IL2RG
SLAMF7	CD38
S1PR4	SELL
CXCL9	GZMB
IL2RG	CTSS
UBD	HLA-F
CCL5	CD8A
CCL18	CXCL13
CCL19	SELL
GBP1	CXCL9
CD2	GNLY
CCL8	CXCL13
GBP5	AIM2
CCL5	SELL
CD3E	IL7R
CCL18	CXCL11
GBP1	CXCL11
IDO1	CXCL11
FOXP3	CXCL9
TNFSF13B	CD38
FOXP3	CD38
GBP5	CXCL11
TNFSF13B	CCL19
CCL5	GNLY
FOXP3	CD2
GBP4	GBP5
IL2RG	SELL
CD27	CD79A
IL2RG	CD2
IDO1	GZMB
CD2	SLAMF7
CD38	GZMB
CD3E	GZMB
CXCL9	SELL
GBP5	GZMB
CD48	S1PR4
CCL5	IDO1
CD48	SELL
IDO1	TNFSF13B
CD2	SIRPG
CD8A	SELL
CD2	S1PR4
CTSS	GNLY
CCR1	SELL
GBP5	CD2
CD3E	CD38
CD2	SLAMF6
CXCL13	SELL
FOXP3	TNFSF13B
CD8A	FOXP3
CD79A	GZMB
IL2RG	GZMB
FOXP3	CXCL13
FOXP3	CCL19
CTSW	GNLY
IDO1	GBP5
CD3E	CD27
UBD	CXCL9
CXCL13	CD27
TNFSF13B	CXCL9
CD48	CTSS
S1PR4	GZMB
CCL5	TNFSF13B
SLAMF7	CTSW
IL2RG	CD27
ALOX5AP	CTSS
FOXP3	CCR1
CCL5	IL7R
IDO1	GBP1
CCL18	IL7R
CD2	CXCL9
CD48	IL7R
CD8A	IL7R
TNFSF13B	SELL
TNFSF13B	CD79A
PDCD1LG2	GZMB
PDCD1LG2	CD27
FOXP3	CXCL11
CD48	IL2RG
CCL19	CD27
CD48	GZMB
PDCD1LG2	CXCL9
IL2RG	CD79A
PDCD1LG2	SELL
CXCL9	CD79A
CD27	GNLY
CCL5	GBP5
CD48	CD27
CCL5	CD27
CD8A	CD27
GBP4	CXCL11
GBP5	BATF2
CXCL11	GZMB
CD3E	CD79A
SLAMF6	SELL
CD2	CCL19
IDO1	SELL
CXCL9	CD27
CXCL13	GZMB
IDO1	CD38
GBP4	CXCL9
FOXP3	GNLY
SLAMF7	GZMB
IDO1	CD27
SLAMF7	CD27
CCL5	CD38
CD48	CD38
TNFSF13B	CXCL11
CD3G	CD79A
CCL18	IDO1
SELL	CD79A
CD8A	CTSS
PDCD1LG2	IL7R
IDO1	CCL8
CD3G	SLAMF6
FPR1	SELL
CCL5	GBP1
APOL6	RARRES3
CCR1	GZMB
PDCD1LG2	CD38
ALOX5AP	CCR1
GBP4	CTSS
CTSW	GZMB
ALOX5AP	FPR1
CCL18	CCL8
SLAMF6	IL7R
IL2RG	SLAMF6
