# Supplementary material for: Immune profiling reveals prognostic genes in high-grade serous ovarian cancer
Source: Aging (Albany NY). 2020 Jun 16;12(12):11398–415. doi: 10.18632/aging.103199 (PMC7343445; doi:10.18632/aging.103199)
Supplement: Supplementary Table 5 [file aging-12-103199-s009..xlsx]

## Sheet: SupplementaryTable5_ICGC_datEx
Supplementary Table 5. Gene expression data of a cohort of 81 HGSOC patients from the ICGC dataset.
A1BG	A1CF	A2M	A2ML1	A3GALT2	A4GALT	A4GNT	AAAS	AACS	AADAC	AADACL2	AADACL3	AADACL4	AADAT	AAED1	AAGAB	AAK1	AAMDC	AAMP	AANAT	AAR2	AARD	AARS	AARS2	AARSD1	AASDH	AASDHPPT	AASS	AATF	AATK	ABAT	ABCA1	ABCA10	ABCA12	ABCA13	ABCA2	ABCA3	ABCA4	ABCA5	ABCA6	ABCA7	ABCA8	ABCA9	ABCB1	ABCB10	ABCB11	ABCB4	ABCB5	ABCB6	ABCB7
DO46453	74.28	0	164.33	0.58	0.01	9.89	0.01	33.07	10.26	7.77	0.09	0	0.09	1.46	4.5	19.72	1.38	138.58	100.48	0.36	19.53	1.2	36.21	3.76	11.02	2.71	5.57	0.7	29.03	1.23	1.03	0.91	0.05	0.01	0.1	18.38	6.25	0.59	2.85	0.72	7.57	0.49	0.13	0.55	2.25	0	0.37	0.17	30.31
DO46380	3.31	0	83.29	0.03	0.06	10.64	0.03	17.36	9.21	7.57	0.06	0.12	0.01	0.63	3.62	29.55	0.98	52.71	127.27	0.16	8.2	1.21	33.29	5.69	5.69	7.41	10.92	0.37	19.3	0.36	1.17	2.29	0.6	0.02	0.05	8.38	1.57	1.06	4.25	0.51	1.3	0.25	0.19	0.29	2.64	0.01	0.39	0.05	30.14
DO46364	10.09	0	83.14	0.03	0.02	2.42	0.01	22.86	9.36	3.95	0.01	0.04	0.01	0.83	4	25.29	0.58	40.16	84.46	0.12	25.32	1.48	27.4	5.85	5.03	3.64	13.03	0.52	25.61	0.36	3.45	4.1	0.18	0.01	0.41	5.31	2.21	0.32	2.35	0.95	3.28	0.97	0.21	0.39	4.53	0.03	0.24	0.02	13.56
DO46402	38.5	0	43.3	0.63	0.03	9.08	0	34.38	7.08	2.43	0.01	0.01	0	1.26	4.63	14.94	0.94	17.55	108.05	0.09	25.05	0.65	64.62	5.45	5.45	3.36	7.32	3.65	24.1	0.77	1.64	3.7	0.31	0.03	0.09	15.6	7.56	0.52	1.1	0.8	2.49	0.61	0.27	0.37	5.16	0.01	0.26	0.11	13.31
DO46342	5.62	0	257.99	0.43	0	31.03	0	13.26	11.9	2.73	0	0.02	0	0.21	1.71	28.62	1.33	72.86	107.92	0.04	13.15	0.94	50.55	1.72	9.72	4.27	5.51	0.39	34.37	0.78	1.27	0.96	0.22	0	0.04	10.51	2.89	3.08	0.95	0.46	1.87	0.23	0.19	0.68	1.5	0	0.31	0.06	15.37
DO46362	8.96	0	45.66	0.32	0.05	3.15	0	36.65	15.2	0.58	0.01	0	0.01	4.24	6.81	28.97	2.79	19.77	89.5	0.19	18.05	0.21	43.51	8.99	6.76	6.18	15.79	1.56	28.87	2.02	6.18	6.16	0.55	0.01	0.15	15.49	8.41	3.76	2.8	1.21	2.72	2.04	0.76	0.2	5.73	0.02	0.06	0.11	15.73
DO46538	3.04	0	8.39	9.83	0.18	10.69	0.03	68.82	5.85	0.04	0	0	0	0.13	2.44	11.49	0.66	43.56	105.18	0.29	18.32	4.44	65.03	5.24	11.09	0.89	4.93	0.39	35.93	0.7	1.65	1.65	0.31	0.01	1.22	6.53	39.97	1.78	2.58	0.16	11.04	0.44	0.18	0.26	3.79	0.02	0.16	0.09	26.39
DO46356	16.69	0	188.14	0.56	0	4.47	0.02	26.7	7.43	0.89	0.05	0.01	0	1.11	1.59	14.09	1.18	63.03	82.79	0.15	22.33	0.4	26.99	2.24	17.95	1.08	13.14	1.04	50.91	5.2	1.73	0.99	0.25	0.01	0.13	8.57	20.22	2.51	0.31	0.47	1.02	0.42	0.29	0.45	2.76	0.01	1.06	0.46	52.85
DO46412	5.31	0.01	55.58	0.07	0	9.32	0.02	37.67	8.26	8.13	0	0	0	3.28	4.16	13.61	1.01	32.26	64.53	0.21	24.99	1.24	67.05	2.36	8.29	2.58	14.77	0.8	23.57	0.26	1.68	4.45	0.27	0.02	0.43	10.65	2.9	1.32	5.49	0.62	5.6	0.29	0.46	1.9	4.34	0	0.42	0.03	15.01
DO46400	15.17	0	56.27	1.65	0.01	8.41	0.03	26.47	9.59	6.44	0.04	0	0.03	0.52	4.74	9.77	4.36	36.13	91.7	0.06	20.52	5.02	53.72	7.86	6.43	2.23	17.58	0.56	28.47	1.86	3.73	3.5	0.16	0	0.05	6.21	6.92	1.62	5.41	0.29	8.16	0.36	0.25	1.88	6.01	0.02	0.39	0.12	6.53
DO46352	3.69	0	80.21	0.15	0.03	9.81	0	33.85	10.09	2.26	0	0	0	0.63	4.71	22.37	0.51	28.74	174.66	0.19	22.86	0.34	27.2	3.81	4.62	1.77	8.5	0.19	24.97	1.01	3.93	1.94	0.07	0.02	0.32	2.84	6.32	0.45	0.44	0.35	2.12	0.21	0.23	0.87	3.21	0.01	0.33	0.05	15.35
DO46571	14.57	0.01	93.53	0.09	0.14	4.31	0.12	21.76	8.55	0.68	0.14	0.01	0.01	4.14	3.69	31.09	4.64	30.12	95.12	0.13	22.7	2.61	26.23	18.89	14.32	6.49	13.29	1.69	24	0.82	1.47	8.12	0.75	0.04	0.09	12.37	3.46	0.38	4.83	2.58	6.94	2.9	1.3	1.48	5.25	0.03	0.37	0.11	11.4
DO46374	10.92	0	59.41	0.06	0.03	8.52	0.01	22.39	10.94	1.82	0	0.02	0	0.37	3.47	12.95	6.62	48.16	65.52	0.05	20.9	15.45	47.08	5.05	3.55	2.62	19.95	0.89	23.8	2.11	3.11	7.02	0.17	0.01	0.1	8.51	7.83	29.28	1.86	0.87	4.05	1.27	0.31	0.62	6.05	0.02	0.36	0.06	7.7
DO46327	6.37	0	64.82	0.17	0.01	6.35	0.03	17.67	9.81	0.12	0	0.04	0	0.76	2.94	20.52	3.78	26.34	48.12	0.08	12.87	0.62	33.91	4.77	3.04	3.24	20.97	1.53	10.92	0.43	1.53	13.74	0.2	0	1.13	7.41	2.72	1.05	2.93	0.68	6.37	0.63	0.38	0.68	8.63	0.01	0.4	0.12	4.58
DO46338	2.25	0	37.47	1.01	0.04	9.67	0.11	43.97	7.13	0.12	0	0	0	3.48	2.59	18.1	2.36	25.28	77.96	0.06	18.61	1.42	64.07	6.35	8.18	5.06	21.66	2.59	21.82	1.66	2.77	2.07	0.62	0.05	0.06	6.81	2.02	4.33	2.68	0.89	0.43	2.03	0.52	0.62	7.84	0.05	0.1	0.13	14.83
DO46328	5.06	0	69.43	0.42	0.07	6.63	0.02	40.84	15.04	7.97	0.01	0.01	0	0.53	4.9	30.81	1.34	112.32	108.53	0.07	26.77	1.59	48.45	6.17	8.59	7.63	20.54	2.61	21.65	0.34	2.36	4.36	0.24	0.37	0.17	3.56	2.35	0.15	3.55	0.87	4.43	1.21	0.56	0.78	11.39	0.14	0.11	0.07	20.5
DO46370	24.84	0	30.4	0.1	0.03	5.82	0.02	41.06	16.88	0.35	0	0.03	0.01	1.82	4.42	12.36	0.94	69.72	102.84	0.24	24.14	1.08	45.09	4.6	9.27	3.91	9.89	1.28	52.23	1.11	4.16	1.18	0.76	0.01	0.14	10.11	2.78	1.7	6.42	0.4	1.06	0.84	0.32	0.53	3.29	0.01	0.09	0.13	20.23
DO46581	7.53	0	42.82	0.13	0.03	4.44	0.01	41.06	16.87	8.48	0.01	0.07	0.03	1.17	5.29	25.22	6.16	81.89	145.84	0.08	19.26	1.8	40.6	5.53	17.87	2.78	8.19	2.4	41.1	0.45	2.31	7.51	0.31	0.03	0.15	0.88	7.81	1.74	4.4	0.1	4.14	0.19	0.17	0.42	2.44	0.01	0.46	0.05	25.8
DO46326	7.97	0	87.12	0.08	0	17.8	0.06	26.77	11.65	0.41	0.01	0	0	1.99	5.56	23.57	1.6	14.42	56.22	0.11	25.75	0.5	34.53	5.41	8.79	7.14	22.16	5.1	26.16	0.23	6.06	8.94	0.22	0.06	0.38	24.74	2.5	2.31	5.63	0.93	7.35	0.49	0.15	0.92	6.25	0	0.29	0.08	11.58
DO46382	34.18	0	69.27	0	0.09	11.57	0.02	26.08	14.53	0.59	0	0	0	1.82	3.55	16.99	3.68	34.56	122.76	0.07	22.02	2.35	35.21	7.89	5.45	3.34	24.69	1.87	22.03	0.22	1.92	2.9	0.15	0.02	0.08	11.35	5.45	1.12	2.89	0.87	4.81	1.26	0.26	0.68	5.34	0.01	0.22	0.07	12.8
DO46606	7.49	0	144.91	0.24	0.02	8.55	0.12	30.08	5.07	0.07	0	0	0	7.55	15.14	21.92	4.32	73.69	85.97	0.11	40.85	1.57	42.86	3.38	7.68	8.61	23.71	2.48	16.23	0.3	2.56	11.31	0.1	0.41	0.73	6.92	4.13	0.28	4.71	0.22	1.88	1.03	0.26	1.54	5.66	0.02	0.24	0.05	8.43
DO46329	4.65	0	77.49	30.7	0.04	41.83	0.02	27.18	19.6	6.17	0.01	0.19	0	1.31	1.73	14.88	0.6	83.36	146.4	0.01	19.48	0.31	31.46	6.76	5.65	2.08	22.6	0.83	23.49	1.58	1.55	0.73	0.34	0.03	0.18	6.94	2.2	5.39	5.1	0.89	3.71	1.56	0.54	0.56	5.73	0.04	0.12	0.26	52.69
DO46428	2.48	0	21.54	3.16	0.11	15.13	0.06	52.76	7.39	7.6	0	0.01	0.03	1.32	1.91	7.76	2	21.31	48.33	0.78	12.41	1.38	11.96	6.4	30.6	5	4.8	1.04	31.31	0.48	1.52	0.89	2.5	0.01	0.61	39.74	5.64	5.71	21.51	0.54	31.71	0.37	0.45	1.11	6.03	0.08	0.2	0.05	12.34
DO46388	10.44	0	109.26	0.25	0	9.75	0.01	12.38	6.06	6.86	0.15	0.03	0.01	0.67	4.68	20.95	1.95	32.7	92.29	0.05	21.95	0.19	27.95	5.41	7.39	2.73	14.11	0.73	26.63	0.65	2.53	12.98	0.22	0.01	0.11	4.93	6.72	2.16	1.45	1.67	2.17	1.56	0.83	0.99	10.48	0.14	0.38	0.09	19.88
DO46376	28.69	0	113.96	0.01	0.22	11.56	0.03	29.04	12.36	4.1	0	0.01	0	1.28	8.64	22.29	1.65	35.53	54.01	0.12	18.46	1.02	49.49	6.51	8.52	3.54	20.81	1.66	28.18	0.77	6.15	2.16	0.3	0.07	0.82	11.48	7.99	2.19	2.66	1.43	7.92	0.92	0.45	1.31	1.6	0.01	0.63	0.16	8.48
DO46348	15.01	0	96.52	0.75	0	6.17	0.03	23.05	10.43	0.14	0.26	0	0.02	1.51	4.7	22.73	2.5	21.29	58.47	0.12	26.94	1.46	91.8	6.09	11.07	3.6	15.78	1.07	39.63	0.79	1.61	11.81	0.1	0.05	0.34	8.46	8.19	1.3	2.06	0.74	1.78	1.42	0.3	0.4	4.01	0.02	0.39	0.2	17.78
DO46336	1.98	0	66.7	0.21	0.01	6.38	0.05	30.19	14.1	0.54	0	0	0.01	3.21	2.86	44.06	3.88	28.74	77.38	0.05	20.37	0.66	91.95	9.09	9.39	3.38	44.95	1.93	47.13	0.2	1.91	7.83	0.19	0.05	0.88	6.14	1.61	0.56	2.23	0.68	2.75	0.9	0.36	0.54	10.29	0.02	0.15	0.11	11.82
DO46597	3.4	0	22.66	0.1	0.09	15.09	0.07	40.53	11.43	1.67	0.07	0	0.29	1.43	2.52	11.56	1.91	25.29	67.95	0.1	21.12	2.51	59.93	6.79	10.3	3.64	14.38	2.18	19.21	0.4	3.14	2.1	0.27	0.02	0.23	27.57	5.39	1.44	12.77	1.08	7.75	1.39	0.48	0.22	6.58	0.02	0.27	0.15	6.31
DO46436	3.64	0.01	62.49	0.33	0.02	3.07	0.01	28.25	9.64	0.12	0	0	0	2.87	4.21	26.01	2.55	15.82	92.24	0.21	20.81	0.91	29.97	13.53	7.24	4.77	15.52	3.94	24.67	0.74	2.95	6.62	0.46	0.08	0.62	20.07	4.35	1.51	4.45	0.82	2.93	0.58	0.53	1.14	5.21	0	0.2	0.08	17.11
DO46344	9.69	0	153.91	0.05	0.01	22.31	0.17	45.95	13.02	2.96	0.01	0.14	0	4.06	2.96	23.12	3.15	31.07	100.91	0.08	19.7	3.68	31.24	10.3	8.14	5.89	14.29	1.54	21.68	1.11	5.63	9.13	0.17	0.03	0.14	17.85	7.72	1.29	1.97	1.43	5.76	2.28	0.59	0.85	3.28	0	0.16	0.05	4.71
DO46334	15.1	0	34.45	0.74	0	6.95	0.02	20.27	13.16	2.76	0.02	0	0	0.84	3.77	23.82	2.01	38.81	94.57	0.04	28.54	0.81	39.35	4.65	8.54	5.78	27.22	1.49	35.35	1.08	2.47	4.52	0.09	0.02	0.21	6.98	5.2	0.54	2.07	1.19	1.34	0.85	0.17	0.55	6.36	0.02	0.23	0.06	8.71
DO46392	14.39	0.03	36.11	0.42	0.01	3.14	0.06	28.5	8.78	5.13	0.02	0	0	1.39	5.33	15.23	1.61	39.08	45.92	0.08	21.05	24.5	33.51	8.42	8.77	13.56	17.67	2.67	29.04	2.8	5.14	3.43	0.29	0.03	0.11	7.71	1.11	1.85	3.45	1.19	2.94	1.85	0.37	0.85	3.88	0	0.73	0.16	6.93
DO46523	7.7	0	30.95	0.13	0.03	9.46	0.08	42.82	5.18	2.73	0.03	0.01	0.01	0.48	4.22	20.09	0.72	51.58	103.18	0.07	25.63	3.42	27.63	7.15	7.41	4.81	16.51	2.44	20.17	0.5	3.51	4.61	0.19	0.03	0.13	26.22	3.87	1.73	4.87	0.44	4.54	0.31	0.14	0.24	8.62	0.03	0.2	0.13	20.77
DO46394	10.29	0.01	77	0.09	0.04	3.59	0.02	26.27	7.99	2.37	0.01	0.02	0.01	1.61	7.34	16.43	0.83	55.17	127.95	0.09	22.25	0.85	57.95	6	7.82	3.11	20.81	0.93	35.07	0.2	3.79	7	0.43	0.03	0.16	2.91	6.39	0.86	2.44	0.48	2.19	0.23	0.15	0.52	12.29	0.01	0.39	0.09	8.4
DO46384	9.38	0	20.02	0.05	0	0.83	0.06	42.16	11.9	1.39	0	0	0	0.95	2.48	23.89	0.92	39.67	77.85	0	18.89	0.83	43.26	3.95	7.26	3	22.45	3.07	18.82	2.27	4.18	3.72	0.08	0.01	1.58	8.21	7.19	1.04	1.35	0.25	1.97	0.23	0.06	2.88	11.78	0.02	0.1	0.12	17.56
DO46396	2.82	0.01	25.3	6.37	0	3.02	0.01	38.83	14.96	20.32	0.21	0.02	0.04	0.95	4.36	14.62	2.16	32.54	77.14	0.16	29.61	1.49	70.33	11.82	7.16	6.17	12.28	0.43	63.34	2.02	1.92	6.78	0.35	0.14	0.08	6.38	7.35	7.24	2.08	0.31	4.6	0.63	0.34	0.73	8.24	0.04	0.19	0.04	13.24
DO46404	0.73	0	81.75	0.09	0.05	22.47	0.02	27.1	10.59	0.13	0	0.06	0	1.45	5.84	33.95	2.66	33.06	78.1	0.1	11.89	0.06	37.5	5.33	4.89	4.39	23.85	0.53	21.68	0.87	3.29	3.63	0.15	0.34	0.84	12.22	4.95	0.27	1.66	0.19	7.28	0.57	0.18	0.39	12.24	0.02	0.1	0.02	5.2
DO46333	6.04	0	181.69	5.94	0	3.36	0	23.13	6.73	1.15	0	0	0	0.15	3.56	20.57	1.39	192.29	85.07	0.18	11.91	0.45	21.76	3.58	18.89	1.49	2.42	1.61	34.83	0.08	0.28	0.2	0.35	0.01	0.03	9.62	8.71	1.29	1.49	0.5	16.63	0.52	0.23	0.14	1.25	0	0.08	0.27	29.44
DO46443	2.91	0	89.97	0.02	0.11	7.46	0.01	27.48	8.93	2.1	0	0.03	0	1.9	2.68	28.24	0.74	33.46	77.94	0.14	19.61	1.09	70.72	6	8.91	6.27	18.87	1.65	28.68	0.5	2.19	2.99	2.32	0.08	0.57	4.68	3.67	0.49	4.27	2.89	3.16	7.41	1.35	1.61	6	0.14	0.29	0.06	19.64
DO46378	2.97	0.01	74.34	0.15	0.01	2.66	0.01	50.39	8.45	7.93	0.04	0.01	0.03	2.62	3.28	18.55	3.27	48.51	61.05	0.02	18.42	1.86	64.3	6.92	5.53	3.1	15.8	5.02	27.87	0.33	10.91	3.5	0.25	0.09	0.47	2.31	3.15	4.79	2.64	0.4	1.41	0.4	0.27	1.15	6.9	0.02	0.19	0.04	6.81
DO46611	39.76	0	549.92	0.12	0	8.33	0	6.06	9.82	1.81	0	0	0	0.5	6.23	9.67	9.85	156.83	30.12	0	8.44	1.68	31.56	0.9	57.14	3.04	3.31	5.16	95.23	0.82	0.27	1.77	0.25	0	1.08	1.81	8.62	0.56	1.08	1.21	25.98	2.56	1.32	0.93	4.44	0.03	0.91	0.29	39.95
DO46354	5.19	0	80.38	0.17	0.01	24.62	0.02	19.75	14	6.32	0.06	0.33	0.02	0.37	6.22	18.42	3.04	27.77	81.27	0.02	20.65	24.15	80.46	3.77	5.46	4.3	22.64	0.68	19.17	2.06	1.05	16.8	0.12	0.02	0.2	9.78	1.71	12.56	2.37	0.36	2.02	0.22	0.11	0.88	17.29	0.01	0.34	0.04	10.47
DO46588	4.92	0	39.13	0.51	0	1.16	0.02	44.57	5.61	5.16	0.02	0	0	9.66	1.7	33.38	1.19	20.58	66.35	0.24	31.21	1.06	54.57	10.98	15.67	7.22	38.23	3.68	65.67	11.35	4.65	1.92	0.4	0.03	0.24	8.66	4.27	0.97	2.06	0.7	1.92	1.2	0.41	0.8	4.46	0.03	0.13	0.08	8.94
DO46438	4.55	0	44.05	0.26	0	13.95	0.22	42.42	9.39	0.27	0	0.01	0.01	1.47	1.92	14.12	0.75	23.97	82.38	0.12	19.89	7.88	32.52	3.92	6.78	4.3	10.99	0.41	23.58	8.73	0.97	3.43	1.26	0.01	0.09	10.57	6.11	0.59	13.25	0.3	4.97	0.2	0.26	0.32	5.97	0.01	0.17	0.06	12.78
DO46350	11.54	0	109.46	0.52	0.06	7.87	0	17.76	9.42	0.74	0.05	0.01	0	0.35	4.3	20.62	2.01	51.84	69.01	0.02	16.74	8.49	46.43	4.13	6.79	3.34	4.71	0.63	30.08	0.55	1.1	4.19	0.25	0	0.05	5.75	4.63	4.14	2.51	1.15	5.48	1.17	0.57	1.58	4.67	0.06	0.88	0.2	10.84
DO46463	14.4	0	12.82	0.24	0.12	3.34	0.04	61.78	11.75	2.51	0.01	0	0	3.73	3.05	17.1	0.69	57.42	129.98	0.24	28.45	1.23	43.46	6.95	14.69	3.44	12.29	7.11	34.63	0.87	7.54	0.88	0.46	0.01	0.32	30.21	3.07	3.72	1.68	0.33	0.87	0.35	0.18	0.24	3.26	0	0.2	0.48	34.63
DO46551	50.86	0.07	96.64	0.03	0.03	6.37	0.04	38.11	6.94	2.49	0.02	0.02	0.07	1.65	4.8	25.07	1.49	28.85	80.79	0.5	17.98	8.25	34.4	5.68	27.71	7.03	21.21	1.33	17.89	0.46	0.84	6.44	1.98	0.01	1.13	5.39	4	3.38	11.17	1.2	5.93	1.47	0.69	1.65	5.88	0.02	0.31	0.16	21.38
DO46366	12.3	0	683.71	0.14	0	3.73	0.01	21.34	5.43	0.99	0.02	0.01	0.01	0.1	2.08	16.65	10.34	135.49	36.86	0.15	10.9	0.61	9.85	2.81	50.68	2.15	1.95	0.75	77.91	0.27	0.37	1.21	0.63	0.01	0.17	2.23	5	0.19	4.66	0.84	12.58	0.82	0.25	0.77	0.69	0	0.77	0.13	32.83
DO46325	5.22	0	120.01	0.08	0	10.39	0.03	32.26	5.87	2.89	0.01	0	0.01	1.21	3.02	19.89	3.16	23.98	79.25	0.09	32.54	2.47	23.02	7.1	8.21	4.81	16.82	1.21	19.99	0.4	2.35	6.74	0.31	0.04	0.35	4.52	1.95	1.12	2.81	0.78	2.87	2.19	0.65	0.88	5.94	0.04	0.51	0.04	11.26
DO46448	20.58	0	378.7	2.41	0	14.25	0	29.01	11.52	3.1	0	0	0	1.06	7.94	17.99	3.3	54.05	80.46	0.24	17.84	4.54	90.46	6.22	5.12	4.47	25.05	1.6	25.25	0.46	0.88	8.39	0.49	0.04	0.36	5.29	3.34	2.76	3.76	1.24	7.96	1.97	0.74	0.63	8.67	0.18	0.54	0.06	9.48
DO46513	0.81	0.01	26.01	0.33	0.03	8.16	0.01	38.09	9.82	7.96	0.02	0.14	0.01	1.02	3.74	39.05	1.37	17.24	105.59	0.37	13.68	0.46	101.52	7.81	8.19	4.41	6.2	1.13	25.5	0.94	8.62	6.36	0.11	0.09	0.4	10.9	3.47	0.74	2.19	0.13	1.37	0.45	0.17	0.24	8.37	0.01	0.19	0.05	18.38
DO46330	13.74	0	43.14	0.5	0.02	8.84	0	28.7	13.11	7.01	0.02	0.03	0	1.47	4.19	23.05	1.81	19.31	78.65	0.05	23.79	2.63	56.21	4.47	4.03	2.79	10.52	0.83	20.72	0.75	1.27	2.53	0.54	0.04	0.32	4.76	4.15	1.73	5.18	0.52	1.9	0.86	0.35	0.69	8.43	0.02	0.12	0.07	19.94
DO46468	3.3	0	41.93	0.33	0.14	5.09	0.05	42.97	11.85	3.28	0	0.01	0.04	6.86	2.36	23.04	1.34	17.55	111.67	0.31	21.32	0.78	42.83	12.75	14.78	4.02	6.8	2.99	29.82	0.97	10.01	3.46	0.46	0.04	2.9	12.76	2.47	3.06	2.93	1.37	6.35	0.88	1.16	1.1	4.92	0.18	0.64	0.13	23.05
DO46528	13.05	0	56.78	0.4	0	3.65	0.01	26.09	15.81	0.97	0.01	0	0.01	1.89	3.74	19.4	1.45	32.99	150.07	0.09	18.38	2.66	56.15	4.71	8.98	2.54	9.24	1.68	19.12	0.7	1.41	2.45	0.17	0.11	0.16	5.53	2.2	10.39	2.16	0.84	7.53	1.45	0.28	0.81	2.55	0	0.66	0.06	29.37
DO46586	3.62	0	42.71	0.02	0.02	0.44	0	32.72	8.78	0.42	0	0	0.01	1.06	5.7	28.99	1.21	36.2	97.45	0.17	18.71	3.34	31.09	4.92	14.43	5.82	11.13	1.89	22.6	0.46	2.49	1.27	0.82	0.03	0.14	3.36	2.09	0.23	9.87	0.07	9.24	0.1	0.12	0.59	8.46	0.01	0.31	0.03	28.76
DO46566	6.51	0.01	27.83	0.06	0.02	6.69	0.01	30.38	10.76	3.12	0.01	0	0.01	2.48	2.12	33.11	5.47	61.72	71.1	0.05	23.77	1.29	42.2	8.6	7.23	7.47	20.2	2.81	20.62	0.71	4.63	9.5	0.08	0.04	0.16	8.43	3.52	2.4	2.04	0.36	1.12	0.08	0.29	0.45	5.2	0	0.34	0.07	15.37
DO46340	12.02	0	120.65	0.04	0.02	10.73	0	23.75	6.48	5.71	0.05	0.01	0	1.92	5.69	28.84	2.13	26.22	69.98	0	21.87	0.4	29.02	4.77	3.11	4.79	17.99	2.21	18.46	0.63	3.53	14.91	0.41	0.05	0.86	17.57	3.13	0.8	6.92	2.38	3.21	1.4	0.69	0.93	4.85	0.01	0.69	0.14	8.41
DO46332	6.74	0	123.46	0.2	0.21	3.93	0.08	29.52	6.88	1.04	0	0.04	0.02	2.41	4.82	36.63	1.98	21.15	60.83	0.2	19.46	1.24	35.9	7.76	10.21	4.17	21.39	3.53	16.32	0.37	5.38	8.94	0.27	0.01	0.28	9.34	4.02	0.42	2.48	1.62	4.07	1.73	0.81	0.8	3.94	0.01	0.38	0.39	7.84
DO46331	42.07	0	56.11	0.09	0.04	3.12	0	39.22	9.74	8.23	0.03	0.03	0.06	0.56	2.12	12.19	2.93	162.11	43.41	0.31	8.72	2.3	18.16	3.3	23.77	1.11	15.18	0.97	41.13	12.95	1.78	0.68	0.57	0.01	0.12	10.93	10.47	2.03	2.79	0.11	16.46	0.31	0.22	0.7	2.04	0	0.41	0.24	41.91
DO46561	13.98	0	13.34	0.11	0.05	5.16	0.03	41.2	10.28	1.45	0.05	0.01	0	4.3	5.09	20.31	1.85	24.39	77.08	0.15	17.05	1.42	29.71	8.04	12.02	7.08	14.77	1.45	18.36	1.47	18.48	12.86	0.79	0.1	0.21	53.26	7.47	2.18	7.58	0.48	2.72	0.75	0.37	0.17	2.82	0.01	0.02	0.14	20.8
DO46346	4	0	77.21	0.42	0.03	10.66	0.01	25.83	19.35	1.91	0.02	0.13	0	1.06	4.92	35.33	2.56	29.19	56.95	0.13	22.22	1.07	37.91	6.34	6.38	7.45	16.62	1.28	30.9	0.23	1.74	9.6	0.67	0.01	0.28	5.05	5.94	0.82	4.72	1.65	2.07	2.8	0.93	1.03	9.5	0.07	0.51	0.03	7.24
DO46602	4.1	0	46.06	0.4	0.07	3.62	0.05	17.42	12.39	0.26	0	0	0.03	0.64	5.6	33.72	0.5	61.14	76.06	0.11	17.72	2.72	15.23	10.45	10.87	2.53	21.47	4.5	15.43	0.57	1.27	5.19	1.86	0	0.11	10.21	2.54	0.02	5.61	1.69	11.48	1.64	1.16	1.65	6.52	0.01	0.15	0.11	10.32
DO46508	13.28	0	76.45	0.53	0.05	8.39	0	37.97	8.11	1.75	0.07	0.01	0.01	1.93	3.54	18.63	3.43	39.92	66.78	0.01	17.37	2.31	36.07	7.53	6.07	5.66	21.69	2.83	15.32	4.47	2.24	6.43	0.31	0.02	0.05	17.94	2.7	0.55	2.4	0.99	3.97	1.3	0.54	0.7	5.12	0.01	0.67	0.08	9.61
DO46358	16.36	0.01	72.64	0.26	0.01	4.25	0.01	38.6	11.42	3.78	0.02	0.01	0.01	2.15	3.02	19.75	2.32	19.39	63.66	0.12	29.23	2.12	27.38	5.45	12.58	5.96	13.08	2.91	28.84	0.21	8.79	9.1	0.4	0.02	1.38	3.95	5.28	1.11	3.09	0.98	2.62	2.01	0.71	0.6	4.23	0	0.19	0.07	8.7
DO46360	9.7	0	110.27	4.37	0.01	21.19	0.01	27.7	9.62	0.81	0.05	0.09	0.01	1.39	2.99	21.74	0.76	51.76	96.26	0.08	20.7	0.97	41.9	5.38	2.83	5.57	13.37	0.78	18.28	0.51	1.09	5.76	0.19	0.01	0.08	4.36	3.41	0.91	2.48	0.49	0.32	0.53	0.26	1.4	3.05	0	0.29	0.03	12.35
DO46386	8.44	0.01	92.65	0.05	0	3.49	0	28.25	7.37	2.11	0.02	0.05	0.03	1.38	5.16	22.06	1.45	37.07	89.41	0.1	21.14	2.72	24.75	7.26	6.97	7.36	21.58	2.02	22.3	0.24	7.24	7.2	0.21	0.01	0.35	8.94	3.45	1.13	3.1	1.29	3.48	1.82	0.22	0.93	7.38	0	0.31	0.03	7.18
DO46390	4.89	0.01	18.86	0.18	0.03	3.38	0.04	26.86	12	20.49	0.02	0.07	0.04	2.01	3.71	16.15	0.67	81.53	58.5	0.15	14.54	0.89	14.74	4.43	10.88	5.97	16.27	3.52	35.78	0.51	1.76	2.38	2.01	0.01	0.19	4.05	5.64	1.58	6.99	0.46	1.49	0.64	0.4	0.63	5.64	0	0.85	0.11	41.99
DO46518	0.92	0	25.42	0.11	0.06	0.64	0.01	39.31	6.28	7.55	0	0	0	0.19	3.42	28.84	4.24	31.61	80.69	0.36	12.26	3.04	35.02	7.13	4.91	4.71	18.43	0.69	9.66	5.1	6.62	3.11	0.17	0.03	0.13	3.67	9.03	0.24	3.26	0.15	3.05	0.24	0.09	0.84	4.43	0.02	0.11	0.05	20.51
DO46408	6.14	0	120.98	3.85	0.01	4.13	0.02	34.42	15.77	0.87	0.02	0	0.06	1.37	4.76	15.55	2.47	14	91.32	0.21	16.67	3.19	26.25	6.08	7.83	3.41	8.56	0.85	22.47	0.29	20.92	9.68	0.28	0.16	0.97	35.05	2.55	4.75	5.82	0.35	2.48	0.38	0.16	0.4	5.34	0.02	0.11	0.09	8.51
DO46372	3.08	0	85.57	0.03	0.06	5.6	0	40.67	7.56	1.78	0	0.02	0.01	0.71	4.95	21.26	1.04	31.85	85.6	0.17	16.49	0.51	45.54	11.67	9.98	4.18	9.01	0.54	29.89	0.4	1.61	1.61	0.78	0.01	0.18	7.14	5.74	0.47	2.95	0.51	6.94	0.72	0.42	1.7	2.83	0.05	0.31	0.07	26.98
DO46368	10.83	0.03	80.25	0.07	0.01	19.5	0.02	29.95	5.43	4.44	0.31	1.93	0.04	1.82	5.48	27.41	0.87	33.03	96.9	0.38	11.8	6.5	36.16	3.75	9.89	3.5	12.56	0.98	31.26	1.66	7.39	4.15	0.89	0.01	0.15	6.27	4.03	4.19	6.52	1.39	8.2	2.3	0.53	1.65	5.13	0.01	0.68	0.09	8.62
DO46493	13.71	0	149.16	0.09	0	10.81	0	19.95	8.6	1.67	0.01	0.01	0	0.19	6.52	21.65	0.69	38.67	108.95	0.08	29.72	1.65	23.57	9.63	6.5	4.21	20.97	0.54	30.13	0.72	2.71	4.41	0.21	0.02	0.82	23.45	2.53	0.29	5.13	0.38	0.69	0.61	0.25	0.77	3.42	0.06	0.26	0.02	13.81
DO46458	6.93	0.01	45.28	0.18	0.03	2.86	0.05	52.26	9.54	11.28	0.53	0.01	0.04	1.79	6.19	21.99	1.8	73.63	71.12	0.24	21.75	0.6	26.82	10.77	33.07	2.47	12.17	4.6	25.53	0.48	1.13	2.94	0.52	0.01	0.67	3.96	3.33	2.62	6.86	1.01	10.42	1.22	0.65	1.32	2.71	0.02	0.2	0.07	11.3
DO46546	1.18	0.06	139.58	1.43	0.16	5.64	0.04	50.81	8.36	4.63	0.02	0.08	0.02	0.16	4.14	13.39	2.74	27.94	79.73	0.4	11.3	0.31	26.35	6.43	26.81	4.52	11.83	1.44	21	0.85	5.12	9.05	1.92	0.06	2.18	13.7	5	1.83	7.54	0.2	10.18	0.52	0.72	0.55	6.07	0	0.19	0.24	52.17
DO46560	7.24	0	56.41	0.01	0.01	8.06	0.05	37.96	11.29	0.38	0	0.01	0	1.93	4.13	16.78	1.7	23.32	59.46	0.1	18.74	0.34	29.53	5.02	6.82	2.72	18.26	0.76	27.75	0.37	1.55	4.93	0.19	0	0.03	15.44	8.58	0.76	1.85	0.8	4.32	0.99	0.4	0.64	6.25	0.07	0.14	0.03	9.72
DO46533	3.12	0	20.05	38.68	0.01	16.77	0.01	50.25	20.21	0.21	0.54	0	0.02	3.43	2.37	23.82	0.95	46.97	68.42	0.07	20.43	1.27	55.58	4.33	6.91	3.82	19.33	2.7	20.33	0.28	6.36	4.39	1.96	0.51	1.22	25.39	5.48	2.97	4.05	0.64	9.08	1.78	0.59	0.45	8.16	0.03	0.16	0.08	15.09
DO46576	39.63	0	87.86	0.01	0	6.61	0.01	20.69	6.22	0.11	0	0	0.01	0.44	2.12	26.77	5.79	141.56	75.98	0.06	28.82	0.96	19.92	4.88	25.38	1.99	5.93	0.38	47.05	0.38	0.17	3.91	0.1	0	0.06	12.92	4.87	0.45	1.63	0.21	4.54	0.14	0.06	0.19	2.71	0	0.98	0.03	58
DO46432	18.69	0	41.23	0.08	0.03	1.67	0.08	20.09	9.7	4.45	0.03	0.02	0.02	1.21	4.85	20.3	0.98	38.82	40.07	0.13	24.21	0.81	27.97	3.5	4.5	2.64	18.31	1.21	25.45	0.24	1.38	4.38	0.53	0	0.86	3.35	2.54	3.04	5.08	1.66	3.2	0.79	0.58	1.18	12.14	0.02	0.42	0.13	6.16
DO46398	13.11	0	102.32	1.12	0	10.13	0.18	39.89	9.62	0.59	0	0.02	0.01	0.95	4.23	12.72	2.96	20.76	87.73	0.11	21.18	1.02	51.53	7.21	7.22	4.47	16.26	6.87	31.29	0.43	8.75	6.93	0.36	0.03	0.11	8.63	8.81	0.59	3.16	1.43	3.95	1.84	0.54	0.92	4.28	0.02	0.6	0.13	10.18
DO46568	6.21	0.01	16.02	0.01	0.04	3.7	0.02	28.32	15.61	0.43	0	0.03	0	1.68	2.88	22.3	2.13	56.28	61.84	0.11	20.83	0.84	19.42	3.32	12.05	4.03	17.56	1.88	17.84	0.48	1.87	7.12	0.35	0.01	0.48	4.81	3.2	2.58	4.3	0.47	2.26	0.26	0.22	0.3	10.92	0	0.14	0.06	7.53
DO46591	32.09	0	97.51	0.24	0	10.46	0	47.27	13.34	0.11	0.12	0.01	0.22	1.8	3.77	17.9	1.88	85.51	89.49	0.13	32.48	1.54	35.72	2.19	21.08	3.98	3.31	1.65	41	5.83	1.41	1.85	0.4	0.06	0.07	11.17	5.35	1.96	4.35	0.23	4.2	0.6	0.19	0.73	2.56	0	1.32	0.13	34.65
[truncated: 5,000 more columns]
