# Supplementary material for: Immune profiling reveals prognostic genes in high-grade serous ovarian cancer
Source: Aging (Albany NY). 2020 Jun 16;12(12):11398–415. doi: 10.18632/aging.103199 (PMC7343445; doi:10.18632/aging.103199)
Supplement: Supplementary Table 6 [file aging-12-103199-s003..xlsx]

## Sheet: Supplementary Table 6
Supplementary Table 6. The prognostic 48 DEGs were validated in ICGC dataset.
logrankp
AIM2	0.11176
ALOX5AP	0.37523
APOL6	0.809697
BATF2	0.0662103
CCL18	0.499144
CCL19	0.202185
CCL5	0.106131
CCL8	0.130924
CCR1	0.427275
CD2	0.243294
CD27	0.0614624
CD38	0.108712
CD3E	0.218734
CD3G	0.155284
CD48	0.530694
CD79A	0.157376
CD8A	0.10198
CTSS	0.83422
CTSW	0.0603427
CXCL11	0.136694
CXCL13	0.0164154
CXCL9	0.100249
ETV7	0.0146715
FOXP3	0.376667
FPR1	0.861558
GBP1	0.000940856
GBP4	0.226633
GBP5	0.0392308
GNLY	0.589744
GPR171	0.581932
GZMB	0.0889492
IDO1	0.537036
IGF2	0.143075
IL2RG	0.487574
IL7R	0.95759
MZB1	0.294345
PDCD1LG2	0.82004
PLA2G2D	0.0467558
RARRES3	0.0528739
S1PR4	0.18881
SELL	0.161728
SIRPG	0.0776803
SLAMF6	0.237321
SLAMF7	0.220393
TAP1	0.0283569
TNFSF13B	0.955953
UBD	0.0199631
